# Supplementary material for: Does enzymatic catalysis lead to more sustainable chemicals production? A life cycle sustainability assessment of isopropyl palmitate
Source: Royal Society of Chemistry journal article supplement (doi:10.1039/d4gc04514a), 2024-01-01
Supplement: d4gc04514a2.xlsx [file d4gc04514a2.xlsx]

## Sheet: Chemical
No	Substance	Compartment	Subcompartment	Unit	Total
1	1-Butanol	Air	high. pop.	µg	1.94942
2	1-Butanol	Water	river	µg	10.2942
3	1-Pentanol	Air	high. pop.	ng	5.49448
4	1-Pentanol	Water	river	ng	13.1869
5	1-Pentene	Air	high. pop.	ng	4.28366
6	1-Pentene	Water	river	ng	9.96516
7	1-Propanol	Air	high. pop.	ng	57.8475
8	1-Propanol	Air	low. pop.	pg	0.315484
9	1-Propanol	Water	river	ng	24.1891
10	1,3-Dioxolan-2-one	Water		µg	5.30471
11	1,4-Butanediol	Air	high. pop.	µg	4.1106
12	1,4-Butanediol	Water	river	µg	9.45439
13	2-Aminopropanol	Air	high. pop.	ng	5.73103
14	2-Aminopropanol	Water	river	ng	13.7583
15	2-Butene, 2-methyl-	Air	high. pop.	pg	1.16904
16	2-Butene, 2-methyl-	Water	river	pg	2.80573
17	2-Methyl-1-propanol	Air	high. pop.	µg	1.6713
18	2-Methyl-1-propanol	Water	river	µg	4.01118
19	2-Methyl-4-chlorophenoxyacetic acid	Air	low. pop.	pg	2.42184e-05
20	2-Methyl-4-chlorophenoxyacetic acid	Water	groundwater	pg	5.60168e-05
21	2-Methyl-4-chlorophenoxyacetic acid	Water	river	pg	1.08653e-05
22	2-Methyl-4-chlorophenoxyacetic acid	Soil	agricultural	ng	1.30011
23	2-Nitrobenzoic acid	Air	high. pop.	ng	13.7932
24	2-Propanol	Air		µg	23.9502
25	2-Propanol	Air	high. pop.	ng	59.8748
26	2-Propanol	Air	low. pop.	ng	4.99919
27	2-Propanol	Water		ng	405.276
28	2-Propanol	Water	river	ng	93.5015
29	2,4-D	Air	low. pop.	µg	1.43112
30	2,4-D	Water		ng	2.91938
31	2,4-D	Water	groundwater	ng	278.086
32	2,4-D	Soil	agricultural	mg	24.9048
33	2,4-D	Soil	forestry	ng	49.0501
34	2,4-D ester	Air	low. pop.	pg	1.70449e-06
35	2,4-D ester	Water	groundwater	pg	8.73549e-06
36	2,4-D ester	Water	river	pg	3.58686e-08
37	2,4-D ester	Soil	agricultural	pg	0.00028146
38	2,4-D, dimethylamine salt	Air	low. pop.	pg	1.76782e-06
39	2,4-D, dimethylamine salt	Water	groundwater	pg	9.23403e-06
40	2,4-D, dimethylamine salt	Water	river	pg	3.79316e-08
41	2,4-D, dimethylamine salt	Soil	agricultural	pg	0.000296931
42	4-Methyl-2-pentanol	Water	river	ng	6.44121
43	4-Methyl-2-pentanone	Air	high. pop.	ng	182.049
44	4-Methyl-2-pentanone	Air	low. pop.	pg	109.254
45	4-Methyl-2-pentanone	Water		pg	2.62494
46	4-Methyl-2-pentanone	Water	river	µg	1.24891
47	Abamectin	Air	low. pop.	ng	2.9399
48	Abamectin	Water		pg	5.4743
49	Abamectin	Water	groundwater	pg	223.027
50	Abamectin	Soil	agricultural	ng	34.9724
51	Abamectin	Soil	forestry	pg	95.2934
52	Acenaphthene	Air		ng	297.484
53	Acenaphthene	Air	low. pop.	ng	3.2766
54	Acenaphthene	Water	ocean	ng	108.796
55	Acenaphthene	Water	river	ng	439.061
56	Acenaphthylene	Air		ng	10.2611
57	Acenaphthylene	Water	ocean	ng	53.8867
58	Acenaphthylene	Water	river	ng	105.008
59	Acephate	Air	low. pop.	µg	2.29711
60	Acephate	Water		ng	2.93432
61	Acephate	Water	groundwater	ng	32.1906
62	Acephate	Soil	agricultural	µg	8.89384
63	Acephate	Soil	forestry	ng	111.549
64	Acetaldehyde	Air		µg	349.685
65	Acetaldehyde	Air	high. pop.	mg	1.11475
66	Acetaldehyde	Air	low. pop.	mg	96.8452
67	Acetaldehyde	Water	river	µg	629.358
68	Acetamide	Air	low. pop.	ng	4.64005
69	Acetamide	Soil	agricultural	ng	15.5307
70	Acetamiprid	Air	low. pop.	ng	56.1464
71	Acetamiprid	Water		pg	23.0357
72	Acetamiprid	Water	groundwater	pg	30.1817
73	Acetamiprid	Soil	agricultural	ng	104.733
74	Acetamiprid	Soil	forestry	ng	5.13519
75	Acetic acid	Air		µg	249.609
76	Acetic acid	Air	high. pop.	mg	1.06659
77	Acetic acid	Air	low. pop.	mg	312.41
78	Acetic acid	Water	river	mg	1.34896
79	Acetochlor	Soil	agricultural	µg	3.02424
80	Acetone	Air		µg	1.89901
81	Acetone	Air	high. pop.	µg	96.8127
82	Acetone	Air	low. pop.	mg	92.2613
83	Acetone	Water		pg	6.25644
84	Acetone	Water	river	µg	7.73956
85	Acetonitrile	Air	low. pop.	mg	26.7639
86	Acetonitrile	Water	river	ng	4.75625
87	Acetyl chloride	Water	river	ng	10.3592
88	Acidity, unspecified	Water		pg	131.642
89	Acidity, unspecified	Water	river	µg	272.814
90	Acifluorfen	Air	low. pop.	ng	2.58752
91	Acifluorfen	Soil	agricultural	pg	110.915
92	Aclonifen	Soil	agricultural	pg	15.5514
93	Acrinathrin	Soil	agricultural	pg	4.88744e-12
94	Acrolein	Air		µg	117.588
95	Acrolein	Air	high. pop.	µg	12.4312
96	Acrolein	Air	low. pop.	µg	11.2316
97	Acrylate	Water	river	pg	884.072
98	Acrylic acid	Air	high. pop.	pg	373.538
99	Actinides, radioactive, unspecified	Air	low. pop.	mBq	8.99083
100	Actinides, radioactive, unspecified	Water	ocean	mBq	3.41484
101	Aerosols, radioactive, unspecified	Air	low. pop.	µBq	488.06
102	Alachlor	Air	low. pop.	ng	18.3114
103	Alachlor	Soil	agricultural	ng	64.8287
104	Aldehydes, unspecified	Air		ng	177.102
105	Aldehydes, unspecified	Air	high. pop.	ng	84.1012
106	Aldehydes, unspecified	Air	low. pop.	µg	6.80152
107	Aldicarb	Soil	agricultural	ng	66.2991
108	Aldrin	Soil	agricultural	ng	771.675
109	Alkylbenzene (C10-C15)	Air	low. pop.	ng	85.6993
110	Alkylbenzene (C10-C15)	Soil	agricultural	ng	653.369
111	Alkylbenzene (C10-C15)	Soil	forestry	ng	1.82239
112	Allyl chloride	Water		ng	113
113	Alpha-cypermethrin	Air	low. pop.	ng	9.76791
114	Alpha-cypermethrin	Water		pg	14.9589
115	Alpha-cypermethrin	Soil	agricultural	ng	73.8311
116	Alpha-cypermethrin	Soil	forestry	pg	277.409
117	Aluminium	Raw	in ground	mg	107.575
118	Aluminium (III)	Air		mg	9.26649
119	Aluminium (III)	Air	high. pop.	mg	3.41298
120	Aluminium (III)	Air	low. pop.	mg	2.83154
121	Aluminium (III)	Water		µg	4.44692
122	Aluminium (III)	Water	groundwater	µg	578.372
123	Aluminium (III)	Water	ocean	µg	20.2328
124	Aluminium (III)	Water	river	mg	3.75146
125	Aluminium (III)	Soil		mg	3.0818
126	Aluminium (III)	Soil	agricultural	mg	67.6719
127	Aluminium (III)	Soil	industrial	µg	503.305
128	Aluminium hydroxide	Water		pg	548.163
129	Ametryn	Soil	agricultural	pg	868.846
130	Amidosulfuron	Soil	agricultural	pg	56.5518
131	Ammonia	Air		mg	22.8261
132	Ammonia	Air	high. pop.	mg	45.6384
133	Ammonia	Air	low. pop.	g	2.8186
134	Ammonia	Soil	industrial	µg	1.63446
135	Ammonium carbonate	Air	high. pop.	µg	20.8779
136	Ammonium sulfate	Water		ng	39.3198
137	Ammonium, ion	Water		mg	69.8792
138	Ammonium, ion	Water	groundwater	µg	238.172
139	Ammonium, ion	Water	ocean	mg	7.45504
140	Ammonium, ion	Water	river	mg	19.5543
141	Anhydrite	Raw	in ground	mg	1.27764
142	Aniline	Air	high. pop.	µg	45.6484
143	Aniline	Water		µg	14.8247
144	Aniline	Water	river	µg	109.564
145	Anthracene	Air		pg	51.8989
146	Anthracene	Water	river	ng	48.5988
147	Anthranilic acid	Air	high. pop.	ng	10.7467
148	Anthraquinone	Soil	agricultural	pg	3.07945
149	Antimony	Raw	in ground	µg	13.5658
150	Antimony-122	Water	river	µBq	170.243
151	Antimony-124	Air	low. pop.	nBq	106.715
152	Antimony-124	Water	river	mBq	54.8081
153	Antimony-125	Air	low. pop.	µBq	4.40673
154	Antimony-125	Water	river	mBq	8.17259
155	Antimony, ion	Air		mg	2.61204
156	Antimony, ion	Air	high. pop.	µg	1.8083
157	Antimony, ion	Air	low. pop.	µg	7.73107
158	Antimony, ion	Water		pg	11.3944
159	Antimony, ion	Water	groundwater	µg	11.8997
160	Antimony, ion	Water	river	µg	378.705
161	Antimony, ion	Soil		ng	424.454
162	Antimony, ion	Soil	agricultural	ng	469.662
163	Antimony, ion	Soil	industrial	µg	1.35453
164	AOX, Adsorbable Organic Halogen	Water		µg	8.69116
165	AOX, Adsorbable Organic Halogen	Water	ocean	ng	57.9952
166	AOX, Adsorbable Organic Halogen	Water	river	µg	13.0035
167	Argon-40/kg	Raw	in air	mg	100.78
168	Argon-41	Air	low. pop.	mBq	112.205
169	Arsenic	Raw	in ground	µg	9.50341
170	Arsenic, ion	Air		µg	15.8471
171	Arsenic, ion	Air	high. pop.	µg	27.1976
172	Arsenic, ion	Air	low. pop.	µg	74.2093
173	Arsenic, ion	Water		ng	141.52
174	Arsenic, ion	Water	groundwater	µg	132.455
175	Arsenic, ion	Water	ocean	µg	2.22964
176	Arsenic, ion	Water	river	µg	597.578
177	Arsenic, ion	Soil		ng	987.105
178	Arsenic, ion	Soil	agricultural	µg	22.0283
179	Arsenic, ion	Soil	industrial	ng	158.688
180	Arsine	Air	high. pop.	pg	0.00435443
181	Asulam	Soil	agricultural	pg	4.85393e-06
182	Atrazine	Air	low. pop.	ng	15.8131
183	Atrazine	Water		pg	2.63469
184	Atrazine	Water	groundwater	pg	92.0762
185	Atrazine	Water	river	pg	0.234462
186	Atrazine	Soil	agricultural	µg	4.67861
187	Atrazine	Soil	forestry	pg	59.2016
188	Azadirachtin	Soil	agricultural	ng	626.884
189	Azinphos-methyl	Soil	agricultural	pg	788.19
190	Azoxystrobin	Air	low. pop.	ng	237.603
191	Azoxystrobin	Water		pg	331.641
192	Azoxystrobin	Water	groundwater	ng	1.25007
193	Azoxystrobin	Soil	agricultural	µg	1.59596
194	Azoxystrobin	Soil	forestry	ng	10.7859
195	Barite	Water	ocean	µg	460.003
196	Barium	Raw	in ground	mg	88.5457
197	Barium-140	Air	low. pop.	µBq	14.9248
198	Barium-140	Water	river	µBq	38.6812
199	Barium (II)	Air		mg	1.01055
200	Barium (II)	Air	high. pop.	µg	41.9937
201	Barium (II)	Air	low. pop.	µg	36.5536
202	Barium (II)	Water		µg	56.7213
203	Barium (II)	Water	groundwater	µg	26.5617
204	Barium (II)	Water	ocean	mg	5.9481
205	Barium (II)	Water	river	mg	11.6645
206	Barium (II)	Soil		µg	32.5922
207	Barium (II)	Soil	agricultural	µg	40.3554
208	Barium (II)	Soil	industrial	µg	24.93
209	Basalt	Raw	in ground	µg	220.682
210	Benomyl	Soil	agricultural	µg	158.659
211	Bensulfuron methyl ester	Soil	agricultural	pg	4.21423
212	Bentazone	Air	low. pop.	ng	7.93871
213	Bentazone	Water	groundwater	pg	165.483
214	Bentazone	Water	river	pg	0.102553
215	Bentazone	Soil	agricultural	ng	6.444
216	Benzal chloride	Air	high. pop.	ng	66.1507
217	Benzal chloride	Water	river	ng	158.759
218	Benzaldehyde	Air		µg	90.5921
219	Benzaldehyde	Air	high. pop.	µg	6.48543
220	Benzaldehyde	Air	low. pop.	µg	103.756
221	Benzene	Air		µg	555.712
222	Benzene	Air	high. pop.	mg	16.0427
223	Benzene	Air	low. pop.	mg	60.8071
224	Benzene	Water		ng	41.8737
225	Benzene	Water	ocean	µg	171.466
226	Benzene	Water	river	µg	531.035
227	Benzene, 1-methyl-2-nitro-	Air	high. pop.	ng	11.9107
228	Benzene, 1,2-dichloro-	Air	high. pop.	ng	129.154
229	Benzene, 1,2-dichloro-	Water	river	µg	2.88781
230	Benzene, chloro-	Water	river	µg	14.2825
231	Benzene, ethyl-	Air		ng	581.84
232	Benzene, ethyl-	Air	high. pop.	µg	481.236
233	Benzene, ethyl-	Air	low. pop.	mg	3.60075
234	Benzene, ethyl-	Water		pg	59.0118
235	Benzene, ethyl-	Water	ocean	µg	61.8402
236	Benzene, ethyl-	Water	river	µg	119.784
237	Benzene, hexachloro-	Air		pg	125.848
238	Benzene, hexachloro-	Air	high. pop.	pg	819.528
239	Benzene, hexachloro-	Air	low. pop.	pg	4.60224e-05
240	Benzene, hexachloro-	Water		pg	0.936765
241	Benzene, pentachloro-	Air		pg	6.00058e-05
242	Benzene, pentachloro-	Air	high. pop.	ng	1.79673
243	Benzene, pentachloro-	Water		pg	1.53715
244	Benzene, pentachloronitro-	Soil	agricultural	ng	8.12451
245	Benzo(a)anthracene	Air		pg	88.0624
246	Benzo(a)anthracene	Water	river	pg	183.392
247	Benzo(a)pyrene	Air		ng	130.893
248	Benzo(a)pyrene	Air	high. pop.	µg	7.61008
249	Benzo(a)pyrene	Air	low. pop.	µg	7.46547
250	Benzo(a)pyrene	Water	river	pg	22.2821
251	Benzo(b)fluoranthene	Air		pg	61.9425
252	Benzo(b)fluoranthene	Water	river	pg	21.7319
253	Benzo(g,h,i)perylene	Air		pg	23.1047
254	Benzo(g,h,i)perylene	Water	river	pg	3.05806
255	Benzo(k)fluoranthene	Air		pg	44.2696
256	Benzo(k)fluoranthene	Water	river	pg	10.2241
257	Benzovindiflupyr	Water		pg	61.8327
258	Benzovindiflupyr	Soil	forestry	ng	1.75363
259	Benzyl alcohol	Water	river	pg	2.42913
260	Beryllium (II)	Air		ng	151.674
261	Beryllium (II)	Air	high. pop.	ng	405.897
262	Beryllium (II)	Air	low. pop.	ng	108.142
263	Beryllium (II)	Water		pg	10.3141
264	Beryllium (II)	Water	groundwater	ng	491.927
265	Beryllium (II)	Water	river	ng	322.82
266	Beryllium (II)	Soil		ng	180.716
267	Beryllium (II)	Soil	agricultural	ng	25.4796
268	Beryllium (II)	Soil	industrial	ng	35.5297
269	Beta-cyfluthrin	Air	low. pop.	ng	8.76128
270	Beta-cyfluthrin	Water		pg	18.3918
271	Beta-cyfluthrin	Water	groundwater	pg	0.161517
272	Beta-cyfluthrin	Soil	agricultural	ng	27.6009
273	Beta-cyfluthrin	Soil	forestry	pg	287.894
274	Bicarbonate, ion	Water	ocean	mg	50.2805
275	Bifenox	Soil	agricultural	pg	2.02552
276	Bifenthrin	Air	low. pop.	ng	20.1588
277	Bifenthrin	Water		pg	61.485
278	Bifenthrin	Water	groundwater	pg	0.0909692
279	Bifenthrin	Soil	agricultural	ng	40.8936
280	Bifenthrin	Soil	forestry	pg	601.517
281	Bitertanol	Soil	agricultural	pg	0.0522461
282	BOD5 (Biological Oxygen Demand)	Water		g	3.68827
283	BOD5 (Biological Oxygen Demand)	Water	groundwater	µg	136.236
284	BOD5 (Biological Oxygen Demand)	Water	ocean	mg	267.346
285	BOD5 (Biological Oxygen Demand)	Water	river	g	1.69671
286	Borate	Water		pg	68.464
287	Borate	Water	river	µg	1.7763
288	Borax	Raw	in ground	ng	256.336
289	Boric acid	Air	high. pop.	pg	0.000685622
290	Boron	Raw	in ground	mg	2.33724
291	Boron	Air		µg	1.93811
292	Boron	Air	high. pop.	µg	300.578
293	Boron	Air	low. pop.	µg	666.691
294	Boron	Water		µg	16.3315
295	Boron	Water	groundwater	µg	17.3846
296	Boron	Water	ocean	mg	2.13713
297	Boron	Water	river	mg	1.53172
298	Boron	Soil		µg	4.90906
299	Boron	Soil	agricultural	µg	3.77361
300	Boron	Soil	industrial	ng	438.199
301	Boron trifluoride	Air	high. pop.	pg	4.59424
302	Boscalid	Soil	agricultural	pg	1.39194e-10
303	Bromate	Water	river	mg	5.23873
304	Bromide	Water	river	mg	27.0033
305	Bromine	Raw	in water	mg	23.9471
306	Bromine	Air		µg	3.67133
307	Bromine	Air	high. pop.	µg	975.839
308	Bromine	Air	low. pop.	µg	189.255
309	Bromine	Water		ng	134.208
310	Bromine	Water	groundwater	µg	18.6846
311	Bromine	Water	ocean	mg	1.61282
312	Bromine	Water	river	mg	161.782
313	Bromine	Soil		µg	2.99387
314	Bromine	Soil	industrial	µg	1.35243
315	Bromoxynil	Air	low. pop.	pg	2.98427e-05
316	Bromoxynil	Water	groundwater	pg	8.11954e-06
317	Bromoxynil	Water	river	pg	1.26401e-09
318	Bromoxynil	Soil	agricultural	ng	271.408
319	Bromuconazole	Soil	agricultural	pg	0.135702
320	Buprofezin	Soil	agricultural	pg	0.285763
321	Butadiene	Air		ng	334.99
322	Butadiene	Air	high. pop.	ng	3.47511
323	Butane	Air		µg	9.9718
324	Butane	Air	high. pop.	mg	3.73936
325	Butane	Air	low. pop.	mg	21.8591
326	Butene	Air		ng	26.9315
327	Butene	Air	high. pop.	µg	18.3939
328	Butene	Water	river	µg	6.87183
329	Butyl acetate	Water	river	µg	7.46964
330	Butyric acid, 4-(2,4-dichlorophenoxy)-	Air	low. pop.	pg	7.0698e-06
331	Butyric acid, 4-(2,4-dichlorophenoxy)-	Water	groundwater	pg	4.98826e-05
332	Butyric acid, 4-(2,4-dichlorophenoxy)-	Water	river	pg	2.04516e-07
333	Butyric acid, 4-(2,4-dichlorophenoxy)-	Soil	agricultural	pg	0.00160547
334	Butyrolactone	Water		pg	1.92647
335	Cadmium	Raw	in ground	µg	210.943
336	Cadmium (II)	Air		µg	20.5222
337	Cadmium (II)	Air	high. pop.	µg	12.2323
338	Cadmium (II)	Air	low. pop.	µg	20.9753
339	Cadmium (II)	Air	stratosphere + troposphere	pg	0.000297346
340	Cadmium (II)	Water		ng	89.6159
341	Cadmium (II)	Water	groundwater	µg	2.14054
342	Cadmium (II)	Water	ocean	µg	1.3501
343	Cadmium (II)	Water	river	µg	10.7084
344	Cadmium (II)	Soil		ng	719.227
345	Cadmium (II)	Soil	agricultural	µg	60.6646
346	Cadmium (II)	Soil	forestry	ng	274.548
347	Cadmium (II)	Soil	industrial	µg	3.12998
348	Calcite	Raw	in ground	g	34.6301
349	Calcium	Raw	in ground	mg	223.512
350	Calcium	Air		µg	248.575
351	Calcium	Air	high. pop.	mg	91.64
352	Calcium	Air	low. pop.	mg	1.99302
353	Calcium	Water		µg	122.3
354	Calcium	Water	groundwater	mg	29.2352
355	Calcium	Water	ocean	mg	621.294
356	Calcium	Water	river	g	1.20251
357	Calcium	Soil		µg	687.766
358	Calcium	Soil	agricultural	mg	920.87
359	Calcium	Soil	industrial	µg	685.382
360	Captan	Soil	agricultural	pg	1.06671
361	Carbamic acid, [(dibutylamino)thio]methyl-, 2,3-dihydro-2,2-dimethyl-7-benzofuranyl ester	Soil	agricultural	pg	15.8414
362	Carbaryl	Air	low. pop.	ng	2.16208
363	Carbaryl	Water	groundwater	pg	0.00704821
364	Carbaryl	Water	river	pg	8.7771e-05
365	Carbaryl	Soil	agricultural	pg	220.573
366	Carbendazim	Air	low. pop.	ng	674.298
367	Carbendazim	Water		ng	1.25207
368	Carbendazim	Water	groundwater	ng	10.2242
369	Carbendazim	Soil	agricultural	µg	4.8345
370	Carbendazim	Soil	forestry	ng	34.9961
371	Carbetamide	Soil	agricultural	ng	6.1002
372	Carbofuran	Soil	agricultural	mg	86.9827
373	Carbon	Air	high. pop.	ng	8.84799
374	Carbon	Water	groundwater	ng	30.2771
375	Carbon	Soil		µg	309.566
376	Carbon	Soil	agricultural	g	1.79079
377	Carbon	Soil	industrial	mg	19.704
378	Carbon-14	Air	low. pop.	Bq	4.74432
379	Carbon-14	Water	river	mBq	5.20192
380	Carbon dioxide, biogenic	Air		mg	478.967
381	Carbon dioxide, biogenic	Air	high. pop.	kg	2.00774
382	Carbon dioxide, biogenic	Air	low. pop.	g	14.1326
383	Carbon dioxide, fossil	Air		g	144.22
384	Carbon dioxide, fossil	Air	high. pop.	kg	1.12122
385	Carbon dioxide, fossil	Air	low. pop.	g	337.572
386	Carbon dioxide, fossil	Air	stratosphere + troposphere	ng	92.6075
387	Carbon dioxide, in air	Raw	in air	kg	5.06209
388	Carbon dioxide, land transformation	Air		kg	2.30665
389	Carbon dioxide, land transformation	Air	low. pop.	kg	1.22249
390	Carbon dioxide, non-fossil, resource correction	Raw	in air	g	8.68589
391	Carbon dioxide, to soil or biomass stock	Soil		g	12.7553
392	Carbon dioxide, to soil or biomass stock	Soil	agricultural	mg	9.88128
393	Carbon disulfide	Air		pg	282.534
394	Carbon disulfide	Air	high. pop.	ng	52.6788
395	Carbon disulfide	Air	low. pop.	µg	926.621
396	Carbon disulfide	Water	river	ng	79.0407
397	Carbon monoxide, biogenic	Air		µg	485.816
398	Carbon monoxide, biogenic	Air	high. pop.	mg	137.263
399	Carbon monoxide, biogenic	Air	low. pop.	mg	178.635
400	Carbon monoxide, fossil	Air		mg	205.695
401	Carbon monoxide, fossil	Air	high. pop.	mg	608.827
402	Carbon monoxide, fossil	Air	low. pop.	mg	723.318
403	Carbon monoxide, fossil	Air	stratosphere + troposphere	pg	65.6009
404	Carbon monoxide, land transformation	Air	low. pop.	g	15.4636
405	Carbon, organic, in soil or biomass stock	Raw	in ground	g	347.558
406	Carbonate	Water		µg	120.843
407	Carbonate	Water	ocean	mg	13.2864
408	Carbonate	Water	river	mg	41.0622
409	Carbonyl sulfide	Air		µg	68.1307
410	Carboxylic acids, unspecified	Water		pg	0.100387
411	Carboxylic acids, unspecified	Water	ocean	mg	8.48366
412	Carboxylic acids, unspecified	Water	river	mg	16.4235
413	Carfentrazone-ethyl	Air	low. pop.	ng	5.47075
414	Carfentrazone-ethyl	Water		pg	7.99661
415	Carfentrazone-ethyl	Soil	agricultural	ng	60.2461
416	Carfentrazone-ethyl	Soil	forestry	pg	148.188
417	Carnallite	Raw	in water	mg	4.30083
418	Cerium	Raw	in ground	µg	679.202
419	Cerium-141	Air	low. pop.	µBq	3.60438
420	Cerium-141	Water	river	µBq	46.8908
421	Cerium-144	Water	river	µBq	90.771
422	Cesium-134	Air	low. pop.	nBq	172.627
423	Cesium-134	Water	river	mBq	1.32746
424	Cesium-136	Water	river	µBq	52.9184
425	Cesium-137	Air	low. pop.	µBq	4.35998
426	Cesium-137	Water	ocean	mBq	391.309
427	Cesium-137	Water	river	mBq	23.2568
428	Cesium (I)	Water	ocean	µg	2.30403
429	Cesium (I)	Water	river	µg	4.4629
430	Chloramine	Air	high. pop.	ng	35.9535
431	Chloramine	Water	river	ng	320.863
432	Chlorantraniliprole	Air	low. pop.	pg	5.59626
433	Chlorantraniliprole	Water		pg	0.00541774
434	Chlorantraniliprole	Water	groundwater	pg	0.0883851
435	Chlorantraniliprole	Soil	agricultural	pg	36.5195
436	Chlorantraniliprole	Soil	forestry	pg	0.395169
437	Chlorate	Water	river	mg	40.2221
438	Chloridazon	Soil	agricultural	pg	12.1106
439	Chloride	Water		mg	36.973
440	Chloride	Water	groundwater	mg	524.821
441	Chloride	Water	ocean	g	10.7337
442	Chloride	Water	river	g	75.8012
443	Chloride	Soil		µg	18.235
444	Chloride	Soil	agricultural	mg	10.2979
445	Chloride	Soil	industrial	µg	327.589
446	Chlorides, unspecified	Water		mg	4.66857
447	Chlorimuron-ethyl	Air	low. pop.	ng	37.5986
448	Chlorimuron-ethyl	Water		pg	47.2433
449	Chlorimuron-ethyl	Water	groundwater	ng	8.32824
450	Chlorimuron-ethyl	Soil	agricultural	ng	287.179
451	Chlorimuron-ethyl	Soil	forestry	ng	1.72084
452	Chlorinated solvents, unspecified	Air	low. pop.	ng	4.82888
453	Chlorinated solvents, unspecified	Water	river	µg	611.598
454	Chlorine	Air		µg	98.8132
455	Chlorine	Air	high. pop.	mg	4.39088
456	Chlorine	Air	low. pop.	ng	834.33
457	Chlorine	Water		µg	8.48286
458	Chlorine	Water	groundwater	µg	77.9149
459	Chlorine	Water	river	mg	65.8353
460	Chlorine	Soil		µg	77.9149
461	Chlormequat	Soil	agricultural	ng	32.6605
462	Chloroacetic acid	Air	high. pop.	µg	38.676
463	Chloroacetic acid	Water	river	µg	98.6226
464	Chloroacetyl chloride	Water	river	ng	18.3487
465	Chloroethylene	Air		ng	177.743
466	Chloroethylene	Air	high. pop.	µg	1.20406
467	Chloroethylene	Water		pg	46.0218
468	Chloroethylene	Water	river	µg	4.97253
469	Chloroform	Air		ng	22.0345
470	Chloroform	Air	high. pop.	ng	502.066
471	Chloroform	Air	low. pop.	ng	424.96
472	Chloroform	Water		pg	120.533
473	Chloroform	Water	river	ng	17.0968
474	Chloropicrin	Soil	agricultural	pg	5.21327e-08
475	Chlorosilane, trimethyl-	Air	high. pop.	pg	216.87
476	Chlorosulfonic acid	Air		pg	0.0238161
477	Chlorosulfonic acid	Air	high. pop.	ng	6.9358
478	Chlorosulfonic acid	Water	river	ng	17.2955
479	Chlorothalonil	Soil	agricultural	ng	241.819
480	Chlorpyrifos	Air	low. pop.	µg	26.5612
481	Chlorpyrifos	Water		ng	37.3135
482	Chlorpyrifos	Water	groundwater	ng	45.5494
483	Chlorpyrifos	Soil	agricultural	µg	235.242
484	Chlorpyrifos	Soil	forestry	ng	728.038
485	Chlorpyrifos methyl	Soil	agricultural	µg	3.8492
486	Chlorsulfuron	Soil	agricultural	pg	0.187074
487	Chlortoluron	Soil	agricultural	ng	1.84866
488	Choline chloride	Soil	agricultural	pg	25.7904
489	Chromium	Raw	in ground	mg	6.62733
490	Chromium-51	Air	low. pop.	nBq	230.968
491	Chromium-51	Water	river	mBq	4.28713
492	Chromium (III)	Air		µg	50.0994
493	Chromium (III)	Air	high. pop.	µg	71.1442
494	Chromium (III)	Air	low. pop.	µg	34.5476
495	Chromium (III)	Air	stratosphere + troposphere	pg	0.00148659
496	Chromium (III)	Water		µg	12.6268
497	Chromium (III)	Water	groundwater	µg	3.8022
498	Chromium (III)	Water	ocean	µg	4.01539
499	Chromium (III)	Water	river	µg	20.7621
500	Chromium (III)	Soil		µg	5.59629
501	Chromium (III)	Soil	agricultural	µg	882.539
502	Chromium (III)	Soil	forestry	µg	3.13761
503	Chromium (III)	Soil	industrial	µg	9.55782
504	Chromium (VI)	Air		ng	39.4079
505	Chromium (VI)	Air	high. pop.	µg	1.53351
506	Chromium (VI)	Air	low. pop.	µg	1.38424
507	Chromium (VI)	Water		ng	103.727
508	Chromium (VI)	Water	groundwater	µg	19.7833
509	Chromium (VI)	Water	river	mg	1.912
510	Chromium (VI)	Soil		pg	0.0341183
511	Chrysene	Air		pg	229.587
512	Chrysene	Water	river	pg	118.288
513	Chrysotile	Raw	in ground	µg	754.516
514	Cinidon-ethyl	Soil	agricultural	pg	68.5482
515	Clay, bentonite	Raw	in ground	mg	28.5914
516	Clay, unspecified	Raw	in ground	g	5.36007
517	Clethodim	Air	low. pop.	µg	13.2884
518	Clethodim	Water		ng	18.81
519	Clethodim	Soil	agricultural	µg	118.721
520	Clethodim	Soil	forestry	ng	363.117
521	Clodinafop-propargyl	Soil	agricultural	pg	2.87814
522	Clomazone	Soil	agricultural	pg	70.1236
523	Clopyralid	Soil	agricultural	pg	1.98303
524	Cloquintocet-mexyl	Soil	agricultural	pg	0.668727
525	Cloransulam-methyl	Air	low. pop.	ng	2.25086
526	Cloransulam-methyl	Soil	agricultural	ng	5.80759
527	Clothianidin	Soil	agricultural	ng	15.6583
528	Coal, brown	Raw	in ground	g	23.9158
529	Coal, hard	Raw	in ground	g	65.2862
530	Cobalt	Raw	in ground	mg	1.60603
531	Cobalt-57	Water	river	mBq	1.67983
532	Cobalt-58	Air	low. pop.	µBq	3.24991
533	Cobalt-58	Water	river	mBq	217.526
534	Cobalt-60	Air	low. pop.	µBq	16.3578
535	Cobalt-60	Water	river	mBq	83.1903
536	Cobalt (II)	Air		µg	12.7895
537	Cobalt (II)	Air	high. pop.	µg	17.8146
538	Cobalt (II)	Air	low. pop.	µg	29.3289
539	Cobalt (II)	Water		ng	41.5049
540	Cobalt (II)	Water	groundwater	µg	11.9428
541	Cobalt (II)	Water	ocean	ng	30.7246
542	Cobalt (II)	Water	river	mg	12.5095
543	Cobalt (II)	Soil		µg	2.60968
544	Cobalt (II)	Soil	agricultural	µg	58.9431
545	Cobalt (II)	Soil	industrial	ng	550.566
546	COD (Chemical Oxygen Demand)	Water		g	3.6908
547	COD (Chemical Oxygen Demand)	Water	groundwater	µg	561.401
548	COD (Chemical Oxygen Demand)	Water	ocean	mg	244.806
549	COD (Chemical Oxygen Demand)	Water	river	g	4.43376
550	Copper	Raw	in ground	mg	148.246
551	Copper oxychloride	Air	low. pop.	ng	5.30718
552	Copper oxychloride	Water		pg	21.8921
553	Copper oxychloride	Soil	agricultural	ng	12.2903
554	Copper oxychloride	Soil	forestry	pg	61.1024
555	Copper, ion	Air		mg	1.55718
556	Copper, ion	Air	high. pop.	µg	509.563
557	Copper, ion	Air	low. pop.	µg	753.218
558	Copper, ion	Air	stratosphere + troposphere	pg	0.0501334
559	Copper, ion	Water		µg	87.1153
560	Copper, ion	Water	groundwater	µg	42.1131
561	Copper, ion	Water	ocean	µg	4.65857
562	Copper, ion	Water	river	mg	2.08449
563	Copper, ion	Soil		µg	29.0332
564	Copper, ion	Soil	agricultural	mg	-15.7626
565	Copper, ion	Soil	forestry	µg	-4.08065
566	Copper, ion	Soil	industrial	µg	31.3541
567	Cu-HDO	Water		pg	0.00020914
568	Cumene	Air		pg	192.438
569	Cumene	Air	low. pop.	ng	23.614
570	Cumene	Water		µg	121.242
571	Cyanide	Air		ng	20.1927
572	Cyanide	Air	high. pop.	mg	1.7185
573	Cyanide	Air	low. pop.	mg	505.554
574	Cyanide	Water		ng	692.497
575	Cyanide	Water	ocean	ng	289.847
576	Cyanide	Water	river	µg	51.847
577	Cyanoacetic acid	Air	high. pop.	ng	5.68003
578	Cyclohexane	Air	high. pop.	pg	542.152
579	Cyhalothrin, gamma-	Air	low. pop.	ng	5.17797
580	Cyhalothrin, gamma-	Soil	agricultural	pg	221.976
581	Cymoxanil	Soil	agricultural	pg	363.774
582	Cypermethrin	Air	low. pop.	ng	5.07518
583	Cypermethrin	Water		pg	2.19164
584	Cypermethrin	Water	groundwater	pg	0.38488
585	Cypermethrin	Soil	agricultural	mg	12.2828
586	Cypermethrin	Soil	forestry	pg	421.154
587	Cyproconazole	Air	low. pop.	ng	74.0082
588	Cyproconazole	Water		pg	107.293
589	Cyproconazole	Water	groundwater	pg	406.864
590	Cyproconazole	Soil	agricultural	ng	84.0486
591	Cyproconazole	Soil	forestry	ng	4.284
592	Cyprodinil	Soil	agricultural	ng	1.80743
593	Deltamethrin	Soil	agricultural	pg	8.71826
594	Desmedipham	Soil	agricultural	ng	56.7997
595	Diafenthiuron	Soil	agricultural	pg	450.663
596	Diatomite	Raw	in ground	ng	2.64629
597	Diazinon	Soil	agricultural	ng	2.98813
598	Dibenz(a,h)anthracene	Air		pg	1.70538
599	Dibenz(a,h)anthracene	Water	river	pg	2.1411
600	Dibutyltin	Water	ocean	pg	9.1686e-19
601	Dicamba	Air	low. pop.	ng	1.47719
602	Dicamba	Water	groundwater	pg	6.42426
603	Dicamba	Water	river	pg	0.0256973
604	Dicamba	Soil	agricultural	ng	38.7352
605	Dichlorprop	Air	low. pop.	pg	1.70268e-06
606	Dichlorprop	Water	groundwater	pg	8.73551e-06
607	Dichlorprop	Water	river	pg	3.58688e-08
608	Dichlorprop	Soil	agricultural	pg	0.000281461
609	Dichlorprop-P	Soil	agricultural	ng	204.26
610	Dichlorvos	Soil	agricultural	pg	0.8147
611	Dichromate	Water		pg	64.6868
612	Dichromate	Water	river	ng	650.749
613	Diclofop	Soil	agricultural	pg	4.19755
614	Diclofop-methyl	Soil	agricultural	pg	4.73656
615	Diethanolamine	Water		pg	728.003
616	Diethyl ether	Air	high. pop.	pg	0.0572329
617	Diethylamine	Air	high. pop.	µg	20.2452
618	Diethylamine	Water	river	µg	48.5893
619	Diethylene glycol	Air	high. pop.	pg	0.0484935
620	Difenoconazole	Air	low. pop.	ng	10.0528
621	Difenoconazole	Water		pg	38.5031
622	Difenoconazole	Water	groundwater	pg	46.5865
623	Difenoconazole	Soil	agricultural	ng	241.985
624	Difenoconazole	Soil	forestry	pg	445.467
625	Diflubenzuron	Air	low. pop.	ng	6.98845
626	Diflubenzuron	Water		pg	15.3321
627	Diflubenzuron	Water	groundwater	pg	1.25289
628	Diflubenzuron	Soil	agricultural	µg	2.93924
629	Diflubenzuron	Soil	forestry	pg	288.708
630	Diflufenican	Soil	agricultural	ng	2.49793
631	Diflufenzopyr-sodium	Soil	agricultural	ng	2.93515
632	Diisobutyl ketone	Water	river	ng	417.322
633	Dimethachlor	Soil	agricultural	pg	15.2567
634	Dimethenamid	Air	low. pop.	pg	1.75837
635	Dimethenamid	Water	groundwater	pg	0.620596
636	Dimethenamid	Water	river	pg	0.00775745
637	Dimethenamid	Soil	agricultural	ng	76.888
638	Dimethoate	Soil	agricultural	ng	7.94748
639	Dimethomorph	Soil	agricultural	pg	77.9533
640	Dimethyl carbonate	Air		ng	515.483
641	Dimethyl ether	Air		ng	7.34119
642	Dimethyl malonate	Air	high. pop.	ng	7.1229
643	Dimethylamine	Air	high. pop.	pg	0.324539
644	Dimethylamine	Water	river	µg	19.9743
645	Dinitrogen monoxide	Air		mg	9.54481
646	Dinitrogen monoxide	Air	high. pop.	mg	55.4411
647	Dinitrogen monoxide	Air	low. pop.	mg	847.124
648	Dioxin, 2,3,7,8 Tetrachlorodibenzo-p-	Air		pg	15.5521
649	Dioxin, 2,3,7,8 Tetrachlorodibenzo-p-	Air	high. pop.	ng	1.22686
650	Dioxin, 2,3,7,8 Tetrachlorodibenzo-p-	Air	low. pop.	pg	41.3662
651	Dioxin, 2,3,7,8 Tetrachlorodibenzo-p-	Water		pg	0.000334943
652	Dioxin, 2,3,7,8 Tetrachlorodibenzo-p-	Soil		pg	0.163897
653	Dioxin, 2,3,7,8 Tetrachlorodibenzo-p-	Soil	industrial	pg	2.52579
654	Diphenyltin	Water	ocean	pg	5.80678e-17
655	Dipropylamine	Air	high. pop.	µg	12.9352
656	Dipropylamine	Water	river	µg	31.0447
657	Dipropylthiocarbamic acid S-ethyl ester	Soil	agricultural	ng	32.2994
658	Diquat	Soil	agricultural	ng	39.1873
659	Diquat dibromide	Air	low. pop.	µg	1.04213
660	Diquat dibromide	Water		ng	1.98094
661	Diquat dibromide	Water	groundwater	pg	11.8679
662	Diquat dibromide	Soil	agricultural	µg	7.63156
663	Diquat dibromide	Soil	forestry	ng	43.6802
664	Discarded fish, demersal	Water	ocean	pg	1.64914e-18
665	Discarded fish, pelagic	Water	ocean	pg	5.40136e-09
666	Dithianone	Soil	agricultural	pg	565.518
667	Diuron	Air	low. pop.	ng	28.3751
668	Diuron	Water		pg	15.0221
669	Diuron	Soil	agricultural	ng	541.782
670	Diuron	Soil	forestry	pg	717.724
671	DOC, Dissolved Organic Carbon	Water		mg	961.102
672	DOC, Dissolved Organic Carbon	Water	groundwater	µg	555.423
673	DOC, Dissolved Organic Carbon	Water	ocean	mg	80.4969
674	DOC, Dissolved Organic Carbon	Water	river	mg	816.69
675	Dodecanoic acid	Water		ng	1.61722
676	Dolomite	Raw	in ground	g	14.4695
677	Dysprosium	Raw	in ground	µg	1.83232
678	EDTA	Water		ng	16.0315
679	Emamectin benzoate	Water		pg	57.5793
680	Emamectin benzoate	Water	groundwater	pg	1.46235
681	Emamectin benzoate	Soil	agricultural	ng	402.5
682	Emamectin benzoate	Soil	forestry	ng	4.25619
683	Endosulfan	Soil	agricultural	µg	1.22942
684	Endothall	Soil	agricultural	pg	25.0583
685	Energy, geothermal, converted	Raw	in ground	kJ	6.17588
686	Energy, gross calorific value, in biomass	Raw	biotic	MJ	78.8648
687	Energy, gross calorific value, in biomass, primary forest	Raw	biotic	MJ	3.53781
688	Energy, kinetic (in wind), converted	Raw	in air	kJ	266.548
689	Energy, potential (in hydropower reservoir), converted	Raw	in water	kJ	222.138
690	Energy, solar, converted	Raw	in air	kJ	4.74649
691	Epoxiconazole	Air	low. pop.	ng	1.61043
692	Epoxiconazole	Water		pg	4.24208
693	Epoxiconazole	Water	groundwater	pg	9.16889
694	Epoxiconazole	Soil	agricultural	ng	50.2347
695	Epoxiconazole	Soil	forestry	pg	166.535
696	Esfenvalerate	Air	low. pop.	ng	2.6984
697	Esfenvalerate	Soil	agricultural	pg	568.077
698	Ethalfluralin	Soil	agricultural	pg	5.08646
699	Ethane	Air		µg	2.29707
700	Ethane	Air	high. pop.	µg	554.673
701	Ethane	Air	low. pop.	mg	230.058
702	Ethane, 1,1-difluoro-, HFC-152a	Air	high. pop.	µg	7.28045
703	Ethane, 1,1-difluoro-, HFC-152a	Air	low. pop.	ng	11.6132
704	Ethane, 1,1,1-trichloro-, HCFC-140	Air		pg	13.0333
705	Ethane, 1,1,1-trichloro-, HCFC-140	Air	low. pop.	ng	86.7711
706	Ethane, 1,1,1-trichloro-, HCFC-140	Water	river	pg	1.14604e-05
707	Ethane, 1,1,1-trifluoro-, HFC-143a	Air	low. pop.	pg	2.08948e-24
708	Ethane, 1,1,1,2-tetrafluoro-, HFC-134a	Air		ng	315.281
709	Ethane, 1,1,1,2-tetrafluoro-, HFC-134a	Air	high. pop.	ng	11.7357
710	Ethane, 1,1,1,2-tetrafluoro-, HFC-134a	Air	low. pop.	µg	1.38314
711	Ethane, 1,1,2-trichloro-1,2,2-trifluoro-, CFC-113	Air		ng	5.30327
712	Ethane, 1,1,2-trichloro-1,2,2-trifluoro-, CFC-113	Air	high. pop.	pg	17.7294
713	Ethane, 1,2-dichloro-	Air		µg	67.493
714	Ethane, 1,2-dichloro-	Air	high. pop.	µg	2.37287
715	Ethane, 1,2-dichloro-	Air	low. pop.	ng	173.056
716	Ethane, 1,2-dichloro-	Water		ng	1.00401
717	Ethane, 1,2-dichloro-	Water	river	ng	75.5258
718	Ethane, 2-chloro-1,1,1,2-tetrafluoro-, HCFC-124	Air		ng	5.30327
719	Ethane, chloro-	Air		ng	18.1515
720	Ethane, hexafluoro-, HFC-116	Air		ng	33.6884
721	Ethane, hexafluoro-, HFC-116	Air	high. pop.	ng	1.22971
722	Ethane, pentafluoro-, HFC-125	Air	low. pop.	pg	2.71285e-23
723	Ethanol	Air		pg	109.811
724	Ethanol	Air	high. pop.	µg	163.026
725	Ethanol	Air	low. pop.	mg	2.69835
726	Ethanol	Water		pg	263.634
727	Ethanol	Water	river	µg	325.346
728	Ethephon	Air	low. pop.	pg	9.93313e-07
729	Ethephon	Water	groundwater	pg	6.55573e-08
730	Ethephon	Water	river	pg	3.97291e-10
731	Ethephon	Soil	agricultural	ng	26.9978
732	Ethofumesate	Soil	agricultural	ng	262.402
733	Ethoprop	Soil	agricultural	ng	7.48346
734	Ethyl acetate	Air	high. pop.	µg	21.9349
735	Ethyl acetate	Water	river	µg	51.806
736	Ethyl cellulose	Air	high. pop.	pg	418.709
737	Ethylamine	Air	high. pop.	ng	25.7853
738	Ethylamine	Water	river	ng	61.8853
739	Ethylene	Air		µg	116.592
740	Ethylene	Air	high. pop.	mg	1.84192
741	Ethylene	Air	low. pop.	mg	292.119
742	Ethylene	Water	river	µg	50.519
743	Ethylene diamine	Air	high. pop.	ng	16.0566
744	Ethylene diamine	Water	river	ng	38.6098
745	Ethylene oxide	Air		ng	37.3843
746	Ethylene oxide	Air	high. pop.	µg	20.8982
747	Ethylene oxide	Water		pg	5.95842
748	Ethylene oxide	Water	groundwater	ng	94.248
749	Ethylene oxide	Water	river	µg	47.3668
750	Ethyne	Air		µg	8.11993
751	Ethyne	Air	high. pop.	µg	175.759
752	Ethyne	Air	low. pop.	mg	5.94764
753	Europium	Raw	in ground	µg	3.29411
754	Feldspar	Raw	in ground	ng	173.59
755	Fenbuconazole	Soil	agricultural	pg	147.803
756	Fenoxaprop	Air	low. pop.	ng	3.532
757	Fenoxaprop	Soil	agricultural	ng	11.5516
758	Fenoxaprop-P ethyl ester	Soil	agricultural	ng	19.0437
759	Fenoxaprop ethyl ester	Soil	agricultural	pg	0.349794
760	Fenpiclonil	Soil	agricultural	ng	5.09965
761	Fenpropidin	Soil	agricultural	ng	116.623
762	Fenpropimorph	Soil	agricultural	ng	98.411
763	Fentin hydroxide	Soil	agricultural	ng	1.2949
764	Fipronil	Air	low. pop.	ng	90.3242
765	Fipronil	Water		pg	145.631
766	Fipronil	Water	groundwater	ng	1.62224
767	Fipronil	Soil	agricultural	µg	2.37387
768	Fipronil	Soil	forestry	ng	4.88903
769	Fish, demersal, in ocean	Raw	biotic	pg	1.31932e-17
770	Fish, pelagic, in ocean	Raw	biotic	pg	1.43357e-07
771	Florasulam	Soil	agricultural	pg	0.0145607
772	Fluazifop-p-butyl	Air	low. pop.	ng	5.06819
773	Fluazifop-P-butyl	Soil	agricultural	ng	4.02843
774	Fluazinam	Air	low. pop.	ng	80.9446
775	Fluazinam	Water		pg	455.313
776	Fluazinam	Water	groundwater	ng	3.18532
777	Fluazinam	Soil	agricultural	ng	71.7634
778	Fluazinam	Soil	forestry	ng	3.05416
779	Flucarbazone sodium salt	Soil	agricultural	pg	0.011692
780	Fludioxonil	Air	low. pop.	pg	320.049
781	Fludioxonil	Water		pg	0.452197
782	Fludioxonil	Water	groundwater	pg	0.00686931
783	Fludioxonil	Soil	agricultural	ng	2.99073
784	Fludioxonil	Soil	forestry	pg	22.0242
785	Flufenacet	Air	low. pop.	ng	1.9003
786	Flufenacet	Soil	agricultural	pg	82.7092
787	Flumetsulam	Air	low. pop.	pg	444.611
788	Flumetsulam	Soil	agricultural	ng	5.15572
789	Flumiclorac-pentyl	Air	low. pop.	pg	760.778
790	Flumiclorac-pentyl	Soil	agricultural	pg	32.5975
791	Flumioxazin	Air	low. pop.	ng	18.6312
792	Flumioxazin	Water		pg	12.5985
793	Flumioxazin	Water	groundwater	pg	238.248
794	Flumioxazin	Soil	agricultural	ng	303.248
795	Flumioxazin	Soil	forestry	pg	577.339
796	Fluoranthene	Air		ng	2.07404
797	Fluoranthene	Water	river	ng	962.807
798	Fluorene	Air		ng	12.0897
799	Fluorene	Water	river	ng	354.863
800	Fluoride	Water		mg	1.29997
801	Fluoride	Water	groundwater	µg	251.682
802	Fluoride	Water	ocean	mg	5.50648
803	Fluoride	Water	river	mg	615.822
804	Fluoride	Soil		µg	1.10319
805	Fluoride	Soil	industrial	µg	7.14327
806	Fluorine	Raw	in ground	mg	156.904
807	Fluorine	Air		µg	7.15322
808	Fluorine	Air	high. pop.	µg	821.581
809	Fluorine	Air	low. pop.	µg	4.1429
810	Fluorine	Water	river	µg	71.7833
811	Fluorspar	Raw	in ground	mg	110.713
812	Fluosilicic acid	Air	high. pop.	ng	218.521
813	Fluosilicic acid	Water		ng	25.9988
814	Fluosilicic acid	Water	river	ng	393.337
815	Flupyrsulfuron-methyl	Soil	agricultural	pg	0.0181516
816	Fluquinconazole	Soil	agricultural	pg	128.526
817	Flurochloridone	Soil	agricultural	pg	1.00677e-22
818	Fluroxypyr	Soil	agricultural	pg	177.561
819	Flurtamone	Soil	agricultural	ng	1.50082
820	Flusilazole	Soil	agricultural	pg	516.176
821	Flutolanil	Soil	agricultural	ng	1.47245
822	Fluxapyroxad	Water		pg	0.000205555
823	Fluxapyroxad	Water	groundwater	pg	0.149169
824	Fluxapyroxad	Soil	agricultural	pg	0.846622
825	Fluxapyroxad	Soil	forestry	pg	0.025661
826	Fomesafen	Air	low. pop.	ng	28.6124
827	Fomesafen	Soil	agricultural	ng	44.8996
828	Foramsulfuron	Soil	agricultural	pg	550.348
829	Formaldehyde	Air		µg	814.008
830	Formaldehyde	Air	high. pop.	mg	3.15409
831	Formaldehyde	Air	low. pop.	mg	216.189
832	Formaldehyde	Water		µg	13.4418
833	Formaldehyde	Water	river	µg	168.118
834	Formamide	Air	high. pop.	ng	10.0488
835	Formamide	Water	river	ng	24.1175
836	Formate	Water	river	µg	3.34097
837	Formic acid	Air	high. pop.	ng	3.17642
838	Formic acid	Air	low. pop.	mg	163.557
839	Formic acid	Water	river	ng	7.00105
840	Fungicides, unspecified	Water	ocean	ng	197.885
841	Fungicides, unspecified	Soil	agricultural	ng	8.03853
842	Furan	Air	low. pop.	mg	713.704
843	Gadolinium	Raw	in ground	µg	8.84199
844	Gallium	Raw	in ground	µg	30.1814
845	Gangue	Raw	in ground	g	211.593
846	Gas, mine, off-gas, process, coal mining/m3	Raw	in ground	cm3	501.117
847	Gas, natural/m3	Raw	in ground	l	329.925
848	Gibberellic acid	Air	low. pop.	pg	1.58168
849	Gibberellic acid	Water		pg	0.00652923
850	Gibberellic acid	Soil	agricultural	pg	10.9984
851	Gibberellic acid	Soil	forestry	pg	0.0182609
852	Glufosinate	Soil	agricultural	ng	19.0045
853	Glutaraldehyde	Water	ocean	ng	56.7905
854	Glyphosate	Air	low. pop.	µg	17.531
855	Glyphosate	Water		ng	34.7667
856	Glyphosate	Water	groundwater	ng	12.0143
857	Glyphosate	Water	river	pg	26.438
858	Glyphosate	Soil	agricultural	mg	172.604
859	Glyphosate	Soil	forestry	ng	586.568
860	Glyphosate	Soil	industrial	ng	14.9913
861	Gold	Raw	in ground	µg	4.29142
862	Granite	Raw	in ground	mg	23.7866
863	Graphite	Raw	in ground	µg	25.9258
864	Gravel	Raw	in ground	g	3.08156
865	Gypsum	Raw	in ground	mg	618.696
866	Hafnium	Raw	in ground	µg	108.79
867	Halosulfuron-methyl	Soil	agricultural	pg	1.1977
868	Haloxyfop-ethoxyethyl	Air	low. pop.	ng	12.559
869	Haloxyfop-ethoxyethyl	Water		pg	16.5917
870	Haloxyfop-ethoxyethyl	Water	groundwater	pg	56.7305
871	Heat, waste	Air		kJ	62.8517
872	Heat, waste	Air	high. pop.	kJ	412.57
873	Heat, waste	Air	low. pop.	kJ	15.3944
874	Heat, waste	Water		kJ	13.4139
875	Heat, waste	Water	river	kJ	49.4574
876	Heat, waste	Soil	agricultural	kJ	75.8079
877	Heat, waste	Soil	industrial	kJ	6.40629
878	Helium	Air		µg	31.6093
879	Helium	Air	low. pop.	mg	3.37698
880	Heptane	Air		µg	19.8377
881	Heptane	Air	high. pop.	mg	4.13258
882	Herbicides, unspecified	Soil	agricultural	ng	12.2917
883	Hexane	Air		ng	288.397
884	Hexane	Air	high. pop.	g	2.87605
885	Hexane	Air	low. pop.	mg	1.20634
886	Hydrocarbons, aliphatic, alkanes, cyclic	Air	high. pop.	mg	21.0803
887	Hydrocarbons, aliphatic, alkanes, cyclic	Air	low. pop.	µg	2.50904
888	Hydrocarbons, aliphatic, alkanes, unspecified	Air		µg	170.997
889	Hydrocarbons, aliphatic, alkanes, unspecified	Air	high. pop.	mg	14.8394
890	Hydrocarbons, aliphatic, alkanes, unspecified	Air	low. pop.	µg	142.058
891	Hydrocarbons, aliphatic, alkanes, unspecified	Water	ocean	µg	299.524
892	Hydrocarbons, aliphatic, alkanes, unspecified	Water	river	µg	580.177
893	Hydrocarbons, aliphatic, unsaturated	Air		µg	3.07803
894	Hydrocarbons, aliphatic, unsaturated	Air	high. pop.	mg	46.8636
895	Hydrocarbons, aliphatic, unsaturated	Air	low. pop.	µg	135.764
896	Hydrocarbons, aliphatic, unsaturated	Water		pg	8.56686e-08
897	Hydrocarbons, aliphatic, unsaturated	Water	ocean	µg	27.6484
898	Hydrocarbons, aliphatic, unsaturated	Water	river	µg	64.2098
899	Hydrocarbons, aromatic	Air		µg	2.45844
900	Hydrocarbons, aromatic	Air	high. pop.	mg	9.10076
901	Hydrocarbons, aromatic	Air	low. pop.	ng	466.903
902	Hydrocarbons, aromatic	Water	ocean	mg	1.19875
903	Hydrocarbons, aromatic	Water	river	mg	2.32109
904	Hydrocarbons, chlorinated	Air		ng	50.3725
905	Hydrocarbons, chlorinated	Air	high. pop.	µg	517.546
906	Hydrocarbons, chlorinated	Air	low. pop.	ng	878.531
907	Hydrocarbons, unspecified	Air	low. pop.	µg	17.3425
908	Hydrocarbons, unspecified	Water		µg	61.8988
909	Hydrocarbons, unspecified	Water	ocean	µg	535.76
910	Hydrocarbons, unspecified	Water	river	mg	6.86972
911	Hydrocarbons, unspecified	Soil		µg	2.4694
912	Hydrochloric acid	Air		µg	216.864
913	Hydrochloric acid	Air	high. pop.	mg	24.7938
914	Hydrochloric acid	Air	low. pop.	mg	17.2876
915	Hydrochloric acid	Water		µg	455.47
916	Hydrogen	Air		mg	2.63252
917	Hydrogen	Air	high. pop.	mg	19.8236
918	Hydrogen	Water	river	mg	234.668
919	Hydrogen-3, Tritium	Air	low. pop.	Bq	13.4216
920	Hydrogen-3, Tritium	Water	ocean	Bq	813
921	Hydrogen-3, Tritium	Water	river	Bq	661.59
922	Hydrogen fluoride	Air		µg	63.3658
923	Hydrogen fluoride	Air	high. pop.	µg	791.066
924	Hydrogen fluoride	Air	low. pop.	mg	2.3849
925	Hydrogen peroxide	Air	high. pop.	pg	136.969
926	Hydrogen peroxide	Water	river	µg	23.4769
927	Hydrogen sulfide	Air		µg	405.408
928	Hydrogen sulfide	Air	high. pop.	mg	1.68309
929	Hydrogen sulfide	Air	low. pop.	mg	2.03895
930	Hydrogen sulfide	Water	groundwater	mg	15.5422
931	Hydrogen sulfide	Water	river	µg	2.84235
932	Hydroxide	Water		µg	1.1244
933	Hydroxide	Water	river	ng	303.449
934	Hypochlorite	Water	ocean	µg	23.6258
935	Hypochlorite	Water	river	µg	24.4326
936	Imazamox	Air	low. pop.	ng	1.13806
937	Imazamox	Soil	agricultural	ng	57.8226
938	Imazapyr	Soil	agricultural	pg	73.3803
939	Imazaquin	Air	low. pop.	ng	3.62824
940	Imazaquin	Soil	agricultural	pg	155.486
941	Imazethapyr	Air	low. pop.	ng	11.4469
942	Imazethapyr	Water		pg	93.2831
943	Imazethapyr	Soil	agricultural	ng	180.161
944	Imazethapyr	Soil	forestry	pg	754.175
945	Imidacloprid	Air	low. pop.	ng	275.659
946	Imidacloprid	Water		pg	461.377
947	Imidacloprid	Water	groundwater	ng	16.3489
948	Imidacloprid	Soil	agricultural	µg	1.3341
949	Imidacloprid	Soil	forestry	ng	14.9997
950	Indeno(1,2,3-cd)pyrene	Air		pg	10.0678
951	Indeno(1,2,3-cd)pyrene	Water	river	pg	33.6065
952	Indoxacarb	Air	low. pop.	pg	224.841
953	Indoxacarb	Soil	agricultural	ng	4.64087
954	Indoxacarb	Soil	forestry	pg	4.87974
955	Insecticides, unspecified	Soil	agricultural	pg	0.0952245
956	Iodide	Water	groundwater	µg	1.88761
957	Iodide	Water	ocean	mg	2.6842
958	Iodide	Water	river	mg	12.5136
959	Iodide	Soil	industrial	pg	182.548
960	Iodine	Raw	in water	mg	10.0226
961	Iodine	Air		ng	808.639
962	Iodine	Air	high. pop.	µg	8.15937
963	Iodine	Air	low. pop.	µg	99.0666
964	Iodine-129	Air	low. pop.	mBq	2.10238
965	Iodine-131	Air	low. pop.	mBq	28.5708
966	Iodine-131	Water	river	mBq	10.7181
967	Iodine-133	Air	low. pop.	µBq	342.745
968	Iodine-133	Water	river	µBq	98.5615
969	Iodosulfuron	Soil	agricultural	pg	8.56843
970	Iodosulfuron-methyl-sodium	Soil	agricultural	pg	0.0113266
971	Ioxynil	Soil	agricultural	ng	3.31187
972	Iprodione	Soil	agricultural	ng	8.52582
973	Iron	Raw	in ground	mg	368.925
974	Iron-59	Water	river	mBq	42.5043
975	Iron, ion	Air		mg	5.54874
976	Iron, ion	Air	high. pop.	mg	1.54925
977	Iron, ion	Air	low. pop.	µg	5.18592
978	Iron, ion	Water		µg	609.343
979	Iron, ion	Water	groundwater	mg	39.5675
980	Iron, ion	Water	ocean	µg	549.484
981	Iron, ion	Water	river	mg	514.198
982	Iron, ion	Soil		mg	10.5081
983	Iron, ion	Soil	agricultural	mg	140.653
984	Iron, ion	Soil	industrial	µg	682.932
985	Isocyanic acid	Air	high. pop.	ng	448.386
986	Isoprene	Air	low. pop.	mg	2.37901
987	Isopropylamine	Air	high. pop.	ng	13.3974
988	Isopropylamine	Water	river	ng	32.1538
989	Isoproturon	Soil	agricultural	ng	30.2536
990	Isoxaflutole	Soil	agricultural	ng	99.5083
991	Kaolinite	Raw	in ground	mg	1.84629
992	Kieserite	Raw	in ground	pg	13.6438
993	Kresoxim-methyl	Soil	agricultural	ng	38.9662
994	Krypton	Raw	in air	pg	0.0297774
995	Krypton-85	Air	low. pop.	mBq	356.489
996	Krypton-85m	Air	low. pop.	Bq	1.9803
997	Krypton-87	Air	low. pop.	mBq	50.2791
998	Krypton-88	Air	low. pop.	mBq	65.3705
999	Krypton-89	Air	low. pop.	mBq	26.9911
1000	Lactic acid	Air	high. pop.	µg	10.1327
1001	Lactic acid	Water	river	µg	24.3186
1002	Lactofen	Air	low. pop.	ng	3.65386
1003	Lactofen	Soil	agricultural	pg	156.583
1004	Lambda-cyhalothrin	Air	low. pop.	ng	58.7263
1005	Lambda-cyhalothrin	Water		pg	86.1158
1006	Lambda-cyhalothrin	Water	groundwater	pg	1.0681
1007	Lambda-cyhalothrin	Water	river	pg	3.98149e-14
1008	Lambda-cyhalothrin	Soil	agricultural	ng	123.208
1009	Lambda-cyhalothrin	Soil	forestry	ng	3.66145
1010	Lanthanum	Raw	in ground	µg	453.459
1011	Lanthanum-140	Air	low. pop.	µBq	1.27072
1012	Lanthanum-140	Water	river	µBq	129.583
1013	Laterite	Raw	in ground	mg	3.47885
1014	Lead	Raw	in ground	mg	389.334
1015	Lead-210	Air		µBq	335.759
1016	Lead-210	Air	high. pop.	mBq	16.18
1017	Lead-210	Air	low. pop.	mBq	54.7412
1018	Lead-210	Water		nBq	181.18
1019	Lead-210	Water	groundwater	µBq	921.316
1020	Lead-210	Water	ocean	Bq	2.20871
1021	Lead-210	Water	river	Bq	4.24376
1022	Lead (II)	Air		µg	376.385
1023	Lead (II)	Air	high. pop.	µg	440.478
1024	Lead (II)	Air	low. pop.	µg	283.222
1025	Lead (II)	Air	stratosphere + troposphere	pg	0.594362
1026	Lead (II)	Water		µg	12.6097
1027	Lead (II)	Water	groundwater	µg	29.4719
1028	Lead (II)	Water	ocean	µg	3.81836
1029	Lead (II)	Water	river	µg	98.5303
1030	Lead (II)	Soil		µg	27.7249
1031	Lead (II)	Soil	agricultural	µg	543.523
1032	Lead (II)	Soil	forestry	ng	233.829
1033	Lead (II)	Soil	industrial	µg	25.2718
1034	Lenacil	Soil	agricultural	ng	30.8508
1035	Linuron	Soil	agricultural	ng	170.447
1036	Lithium	Raw	in ground	ng	357.981
1037	Lithium (I)	Air	high. pop.	pg	1.5113
1038	Lithium (I)	Water		ng	673.011
1039	Lithium (I)	Water	groundwater	ng	195.252
1040	Lithium (I)	Water	ocean	µg	610.568
1041	Lithium (I)	Water	river	mg	1.18322
1042	Lithium (I)	Soil		ng	195.252
1043	Lufenuron	Soil	agricultural	ng	12.9498
1044	Lufenuron	Soil	forestry	pg	183.268
1045	m-Xylene	Air		µg	64.9045
1046	m-Xylene	Air	high. pop.	mg	1.80563
1047	m-Xylene	Air	low. pop.	ng	1.57252
1048	m-Xylene	Water		pg	18.9667
1049	m-Xylene	Water	river	ng	20.3188
1050	Magnesite	Raw	in ground	mg	7.03059
1051	Magnesium	Raw	in ground	mg	185.353
1052	Magnesium	Air		ng	289.872
1053	Magnesium	Air	high. pop.	mg	6.834
1054	Magnesium	Air	low. pop.	mg	1.74761
1055	Magnesium	Water		ng	392.754
1056	Magnesium	Water	groundwater	mg	12.0161
1057	Magnesium	Water	ocean	mg	565.537
1058	Magnesium	Water	river	mg	820.377
1059	Magnesium	Soil		µg	143.229
1060	Magnesium	Soil	agricultural	mg	103.848
1061	Magnesium	Soil	industrial	µg	148.943
1062	Malathion	Soil	agricultural	ng	209.822
1063	Maleic hydrazide	Soil	agricultural	ng	8.18521
1064	Mancozeb	Air	low. pop.	µg	1.57948
1065	Mancozeb	Water		ng	2.7691
1066	Mancozeb	Water	groundwater	ng	9.20188
1067	Mancozeb	Soil	agricultural	µg	2.43161
1068	Mancozeb	Soil	forestry	ng	61.3663
1069	Mandipropamid	Soil	agricultural	pg	17.6748
1070	Maneb	Soil	agricultural	pg	190.552
1071	Manganese	Raw	in ground	mg	8.53631
1072	Manganese-54	Air	low. pop.	nBq	118.281
1073	Manganese-54	Water	river	mBq	3.17541
1074	Manganese (II)	Air		µg	84.7947
1075	Manganese (II)	Air	high. pop.	mg	2.67268
1076	Manganese (II)	Air	low. pop.	µg	40.9929
1077	Manganese (II)	Water		µg	10.0408
1078	Manganese (II)	Water	groundwater	µg	648.598
1079	Manganese (II)	Water	ocean	µg	174.493
1080	Manganese (II)	Water	river	mg	2.55975
1081	Manganese (II)	Soil		µg	15.2565
1082	Manganese (II)	Soil	agricultural	mg	64.5035
1083	Manganese (II)	Soil	industrial	µg	15.5372
1084	MCPB	Air	low. pop.	pg	5.00209e-06
1085	MCPB	Water	groundwater	pg	4.90172e-08
1086	MCPB	Water	river	pg	1.06067e-05
1087	MCPB	Soil	agricultural	pg	0.000758183
1088	Mecoprop	Soil	agricultural	pg	10.6804
1089	Mecoprop-P	Soil	agricultural	ng	1.76186
1090	Mefenpyr	Soil	agricultural	pg	26.4049
1091	Mefenpyr-diethyl	Soil	agricultural	pg	0.010272
1092	Mepiquat chloride	Soil	agricultural	pg	289.946
1093	Mercury	Raw	in ground	µg	6.74464
1094	Mercury (II)	Air		µg	1.05215
1095	Mercury (II)	Air	high. pop.	µg	8.89977
1096	Mercury (II)	Air	low. pop.	µg	6.05962
1097	Mercury (II)	Air	stratosphere + troposphere	pg	2.07725e-06
1098	Mercury (II)	Water		ng	22.1252
1099	Mercury (II)	Water	groundwater	ng	83.3641
1100	Mercury (II)	Water	ocean	ng	142.372
1101	Mercury (II)	Water	river	µg	2.55009
1102	Mercury (II)	Soil		ng	6.53819
1103	Mercury (II)	Soil	agricultural	ng	368.628
1104	Mercury (II)	Soil	industrial	ng	44.5123
1105	Mesosulfuron-methyl (prop)	Soil	agricultural	pg	0.0624809
1106	Mesotrione	Air	low. pop.	pg	5.9419
1107	Mesotrione	Water		pg	0.00513628
1108	Mesotrione	Soil	agricultural	ng	157.584
1109	Mesotrione	Soil	forestry	pg	0.201844
1110	Metalaxil	Soil	agricultural	ng	221.852
1111	Metalaxyl-M	Air	low. pop.	pg	128.142
1112	Metalaxyl-M	Water		pg	0.182366
1113	Metalaxyl-M	Water	groundwater	pg	5.65794
1114	Metalaxyl-M	Soil	agricultural	ng	1.12682
1115	Metalaxyl-M	Soil	forestry	pg	8.98115
1116	Metaldehyde (tetramer)	Soil	agricultural	ng	28.5486
1117	Metam-sodium dihydrate	Soil	agricultural	µg	1.39939
1118	Metamitron	Soil	agricultural	µg	1.60078
1119	Metazachlor	Soil	agricultural	pg	35.9993
1120	Metconazole	Soil	agricultural	pg	233.015
1121	Methane, biogenic	Air		µg	22.5586
1122	Methane, biogenic	Air	high. pop.	mg	23.0748
1123	Methane, biogenic	Air	low. pop.	mg	351.389
1124	Methane, bromo-, Halon 1001	Air		ng	11.5049
1125	Methane, bromo-, Halon 1001	Air	high. pop.	pg	6.88064e-13
1126	Methane, bromochlorodifluoro-, Halon 1211	Air	low. pop.	ng	595.339
1127	Methane, bromotrifluoro-, Halon 1301	Air	high. pop.	pg	0.125829
1128	Methane, bromotrifluoro-, Halon 1301	Air	low. pop.	µg	1.48313
1129	Methane, chlorodifluoro-, HCFC-22	Air		pg	3.32673e-12
1130	Methane, chlorodifluoro-, HCFC-22	Air	high. pop.	ng	76.8821
1131	Methane, chlorodifluoro-, HCFC-22	Air	low. pop.	µg	3.4969
1132	Methane, dichloro-, HCC-30	Air		ng	24.3847
1133	Methane, dichloro-, HCC-30	Air	high. pop.	ng	65.2715
1134	Methane, dichloro-, HCC-30	Air	low. pop.	µg	1.25709
1135	Methane, dichloro-, HCC-30	Water	river	ng	294.535
1136	Methane, dichlorodifluoro-, CFC-12	Air	high. pop.	ng	20.0541
1137	Methane, dichlorofluoro-, HCFC-21	Air	high. pop.	pg	196.222
1138	Methane, fossil	Air		mg	3.75392
1139	Methane, fossil	Air	high. pop.	g	2.67627
1140	Methane, fossil	Air	low. pop.	g	2.88474
1141	Methane, land transformation	Air	low. pop.	g	1.01108
1142	Methane, monochloro-, R-40	Air		pg	17.1445
1143	Methane, monochloro-, R-40	Air	low. pop.	µg	2.29812
1144	Methane, tetrachloro-, CFC-10	Air		ng	11.5456
1145	Methane, tetrachloro-, CFC-10	Air	high. pop.	µg	42.9104
1146	Methane, tetrachloro-, CFC-10	Water		pg	73.8535
1147	Methane, tetrafluoro-, CFC-14	Air		ng	589.348
1148	Methane, tetrafluoro-, CFC-14	Air	high. pop.	pg	16.3934
1149	Methane, trichlorofluoro-, CFC-11	Air	high. pop.	pg	216.449
1150	Methane, trifluoro-, HFC-23	Air	high. pop.	ng	62.4342
1151	Methane, trifluoro-, HFC-23	Air	low. pop.	µg	23.2258
1152	Methanesulfonic acid	Air	high. pop.	ng	5.73984
1153	Methanol	Air		µg	208.078
1154	Methanol	Air	high. pop.	µg	193.23
1155	Methanol	Air	low. pop.	mg	297.454
1156	Methanol	Water		µg	6.16233
1157	Methanol	Water	river	mg	1.31854
1158	Methomyl	Air	low. pop.	ng	121.878
1159	Methomyl	Water		pg	103.054
1160	Methomyl	Water	groundwater	ng	7.62744
1161	Methomyl	Water	river	pg	5.87613e-10
1162	Methomyl	Soil	agricultural	ng	636.99
1163	Methomyl	Soil	forestry	ng	7.19425
1164	Methoxyfenozide	Air	low. pop.	ng	3.34519
1165	Methoxyfenozide	Water		pg	6.02929
1166	Methoxyfenozide	Water	groundwater	pg	37.8538
1167	Methoxyfenozide	Soil	agricultural	ng	14.8367
1168	Methoxyfenozide	Soil	forestry	pg	167.666
1169	Methyl acetate	Air		ng	6.16251
1170	Methyl acetate	Air	high. pop.	ng	3.19379
1171	Methyl acetate	Water	river	ng	7.66511
1172	Methyl acrylate	Air	high. pop.	pg	423.847
1173	Methyl acrylate	Water	river	ng	8.27998
1174	Methyl borate	Air	high. pop.	ng	22.0083
1175	Methyl ethyl ketone	Air	high. pop.	ng	208.077
1176	Methyl ethyl ketone	Air	low. pop.	ng	1.30927
1177	Methyl formate	Air		pg	47.9522
1178	Methyl formate	Air	high. pop.	ng	3.40162
1179	Methyl formate	Water	river	ng	1.35807
1180	Methyl lactate	Air	high. pop.	µg	11.124
1181	Methylamine	Air		pg	1.38996
1182	Methylamine	Air	high. pop.	µg	7.39642
1183	Methylamine	Water	river	µg	17.7507
1184	Metolachlor	Air	low. pop.	ng	59.882
1185	Metolachlor	Water		pg	0.0126052
1186	Metolachlor	Water	groundwater	pg	26.5245
1187	Metolachlor	Water	river	pg	0.354327
1188	Metolachlor	Soil	agricultural	µg	5.80163
1189	Metolachlor	Soil	forestry	pg	0.298681
1190	Metosulam	Soil	agricultural	pg	0.0357887
1191	Metribuzin	Air	low. pop.	ng	23.6979
1192	Metribuzin	Soil	agricultural	ng	193.203
1193	Metsulfuron-methyl	Air	low. pop.	pg	912.384
1194	Metsulfuron-methyl	Water		pg	1.72339
1195	Metsulfuron-methyl	Water	groundwater	pg	141.926
1196	Metsulfuron-methyl	Soil	agricultural	ng	88.4546
1197	Metsulfuron-methyl	Soil	forestry	pg	48.6605
1198	Mineral oil	Soil	agricultural	µg	2.74905
1199	Molinate	Soil	agricultural	pg	358.906
1200	Molybdenum	Raw	in ground	mg	1.9007
1201	Molybdenum-99	Water	river	µBq	15.2757
1202	Molybdenum (VI)	Air		µg	261.029
1203	Molybdenum (VI)	Air	high. pop.	µg	3.47388
1204	Molybdenum (VI)	Air	low. pop.	µg	1.03928
1205	Molybdenum (VI)	Water		ng	408.252
1206	Molybdenum (VI)	Water	groundwater	µg	95.2861
1207	Molybdenum (VI)	Water	ocean	ng	28.8004
1208	Molybdenum (VI)	Water	river	µg	141.153
1209	Molybdenum (VI)	Soil		ng	626.151
1210	Molybdenum (VI)	Soil	agricultural	µg	12.9617
1211	Molybdenum (VI)	Soil	industrial	ng	78.0671
1212	Monobutyltin (III)	Water	ocean	pg	1.57904e-16
1213	Monocrotophos	Soil	agricultural	ng	356.124
1214	Monoethanolamine	Air	high. pop.	µg	255.245
1215	Monoethanolamine	Water		pg	0.752903
1216	Monophenyltin	Water	ocean	pg	1.73185e-19
1217	Myclobutanil	Soil	agricultural	ng	1.20211
1218	Naphthalene	Air		ng	233.41
1219	Naphthalene	Water	river	ng	71.156
1220	Napropamide	Soil	agricultural	ng	4.02705
1221	Neodymium	Raw	in ground	µg	217.304
1222	Nickel	Raw	in ground	mg	165.896
1223	Nickel (II)	Air		µg	209.791
1224	Nickel (II)	Air	high. pop.	µg	214.12
1225	Nickel (II)	Air	low. pop.	mg	1.47123
1226	Nickel (II)	Air	stratosphere + troposphere	pg	0.00207725
1227	Nickel (II)	Water		µg	13.0225
1228	Nickel (II)	Water	groundwater	µg	67.2896
1229	Nickel (II)	Water	ocean	µg	7.63403
1230	Nickel (II)	Water	river	mg	4.45927
1231	Nickel (II)	Soil		µg	5.71799
1232	Nickel (II)	Soil	agricultural	µg	540.826
1233	Nickel (II)	Soil	forestry	µg	1.88132
1234	Nickel (II)	Soil	industrial	µg	4.47648
1235	Nicosulfuron	Air	low. pop.	pg	8.92993
1236	Nicosulfuron	Water		pg	0.0138082
1237	Nicosulfuron	Water	groundwater	pg	2.31446
1238	Nicosulfuron	Soil	agricultural	ng	4.10163
1239	Nicosulfuron	Soil	forestry	pg	0.317828
1240	Niobium	Raw	in ground	µg	29.1174
1241	Niobium-95	Air	low. pop.	mBq	52.0192
1242	Niobium-95	Water	river	µBq	599.2
1243	Nitrate	Air		µg	114.932
1244	Nitrate	Air	high. pop.	pg	121.481
1245	Nitrate	Air	low. pop.	µg	14.964
1246	Nitrate	Water		µg	212.995
1247	Nitrate	Water	groundwater	g	98.7299
1248	Nitrate	Water	ocean	µg	256.823
1249	Nitrate	Water	river	mg	189.84
1250	Nitrate	Soil		µg	225.005
1251	Nitric acid	Air		pg	1.31092
1252	Nitric acid	Air	high. pop.	µg	10.0843
1253	Nitric acid	Soil	industrial	ng	132.207
1254	Nitrite	Water		µg	2.76728
1255	Nitrite	Water	groundwater	µg	8.48794
1256	Nitrite	Water	ocean	µg	5.29848
1257	Nitrite	Water	river	µg	4.81052
1258	Nitrobenzene	Air	high. pop.	µg	76.8719
1259	Nitrobenzene	Water		pg	724.092
1260	Nitrobenzene	Water	river	µg	308.064
1261	Nitrogen dioxide	Water	river	ng	91.7511
1262	Nitrogen fluoride	Air	high. pop.	pg	0.0134178
1263	Nitrogen monoxide	Air		ng	828.794
1264	Nitrogen oxides	Air		mg	494.863
1265	Nitrogen oxides	Air	high. pop.	g	2.25201
1266	Nitrogen oxides	Air	low. pop.	g	3.24149
1267	Nitrogen oxides	Air	stratosphere + troposphere	ng	560.613
1268	Nitrogen, atmospheric	Raw	in air	g	5.43493
1269	Nitrogen, atmospheric	Air		g	6.03731
1270	Nitrogen, atmospheric	Water		µg	229.194
1271	Nitrogen, atmospheric	Water	ocean	µg	46.0543
1272	Nitrogen, atmospheric	Water	river	mg	71.7284
1273	Nitrogen, atmospheric	Soil		µg	9.65948
1274	Nitrogen, atmospheric	Soil	industrial	µg	82.1015
1275	Nitrogen, organic bound	Water		µg	1.28028
1276	Nitrogen, organic bound	Water	groundwater	µg	254.89
1277	Nitrogen, organic bound	Water	river	µg	116.638
1278	NMVOC, non-methane volatile organic compounds	Air		mg	62.1269
1279	NMVOC, non-methane volatile organic compounds	Air	high. pop.	mg	515.339
1280	NMVOC, non-methane volatile organic compounds	Air	low. pop.	g	1.09647
1281	NMVOC, non-methane volatile organic compounds	Air	stratosphere + troposphere	pg	5.54127
1282	Noble gases, radioactive, unspecified	Air	low. pop.	kBq	20.2496
1283	Novaluron	Soil	agricultural	ng	1.61742
1284	o-Xylene	Air		µg	26.4525
1285	o-Xylene	Air	high. pop.	pg	782.792
1286	o-Xylene	Water		pg	13.8155
1287	Occupation, annual crop	Raw	land	mm2a	182.823
1288	Occupation, annual crop, irrigated	Raw	land	mm2a	34.7359
1289	Occupation, annual crop, irrigated, intensive	Raw	land	mm2a	0.00408423
1290	Occupation, annual crop, non-irrigated	Raw	land	mm2a	0.770663
1291	Occupation, annual crop, non-irrigated, extensive	Raw	land	mm2a	2.30017
1292	Occupation, annual crop, non-irrigated, intensive	Raw	land	mm2a	76.4514
1293	Occupation, construction site	Raw	land	mm2a	553.749
1294	Occupation, dump site	Raw	land	cm2a	18.6668
1295	Occupation, forest, extensive	Raw	land	cm2a	51.2454
1296	Occupation, forest, intensive	Raw	land	cm2a	199.683
1297	Occupation, grassland, natural (non-use)	Raw	land	mm2a	0.0138569
1298	Occupation, grassland, natural, for livestock grazing	Raw	land	mm2a	9.2835e-10
1299	Occupation, industrial area	Raw		mm2a	75.2449
1300	Occupation, industrial area	Raw	land	mm2a	124.319
1301	Occupation, inland waterbody, unspecified	Raw	land	mm2a	0.00684742
1302	Occupation, mineral extraction site	Raw	land	mm2a	357.198
1303	Occupation, pasture, man made	Raw	land	mm2a	1.69092e-09
1304	Occupation, pasture, man made, extensive	Raw	land	mm2a	1.89474e-09
1305	Occupation, pasture, man made, intensive	Raw	land	mm2a	0.0352412
1306	Occupation, permanent crop	Raw	land	m2a	1.70604
1307	Occupation, permanent crop, irrigated	Raw	land	mm2a	8.79052
1308	Occupation, permanent crop, irrigated, intensive	Raw	land	mm2a	0.00603365
1309	Occupation, permanent crop, non-irrigated	Raw	land	mm2a	17.7356
1310	Occupation, seabed, drilling and mining	Raw	land	mm2a	0.738276
1311	Occupation, seabed, infrastructure	Raw	land	mm2a	0.0367597
1312	Occupation, shrub land, sclerophyllous	Raw	land	mm2a	122.286
1313	Occupation, traffic area, rail network	Raw	land	mm2a	0.246286
1314	Occupation, traffic area, rail/road embankment	Raw	land	mm2a	277.218
1315	Occupation, traffic area, road network	Raw	land	mm2a	9.76761
1316	Occupation, unspecified	Raw	land	mm2a	0.190577
1317	Occupation, unspecified, natural (non-use)	Raw	land	mm2a	0.00425649
1318	Occupation, urban, discontinuously built	Raw	land	mm2a	0.111885
1319	Occupation, urban/industrial fallow (non-use)	Raw	land	mm2a	1.69414
1320	Occupation, water bodies, artificial	Raw	land	cm2a	11.1285
1321	Oil, crude	Raw	in ground	g	348.557
1322	Oils, biogenic	Water	ocean	pg	4.5893e-10
1323	Oils, biogenic	Water	river	µg	12.1843
1324	Oils, biogenic	Soil		ng	161.264
1325	Oils, biogenic	Soil	forestry	mg	12.1954
1326	Oils, biogenic	Soil	industrial	ng	9.99636
1327	Oils, unspecified	Water		µg	317.892
1328	Oils, unspecified	Water	ocean	mg	77.2786
1329	Oils, unspecified	Water	river	mg	2.50125
1330	Oils, unspecified	Soil		mg	3.31817
1331	Oils, unspecified	Soil	industrial	mg	21.1447
1332	Olivine	Raw	in ground	µg	444.572
1333	Orbencarb	Soil	agricultural	ng	29.4802
1334	Organic carbon	Air	high. pop.	ng	22.0064
1335	Organic carbon	Water	groundwater	ng	71.6078
1336	Organic carbon	Soil		ng	71.6078
1337	Organic carbon, placed in landfill	Waste		mg	487.294
1338	Oxamyl	Soil	agricultural	ng	40.6779
1339	Oxydemeton methyl	Soil	agricultural	pg	599.449
1340	Oxyfluorfen	Soil	agricultural	ng	7.49896
1341	Oxygen	Raw	in air	g	15.8544
1342	Oxygen	Air		ng	936.794
1343	Oxygen	Water	river	mg	189.579
1344	Ozone	Air		mg	2.9025
1345	Ozone	Air	high. pop.	ng	18.9387
1346	PAH, polycyclic aromatic hydrocarbons	Air		µg	16.2833
1347	PAH, polycyclic aromatic hydrocarbons	Air	high. pop.	µg	241.307
1348	PAH, polycyclic aromatic hydrocarbons	Air	low. pop.	mg	3.86906
1349	PAH, polycyclic aromatic hydrocarbons	Water		ng	32.0914
1350	PAH, polycyclic aromatic hydrocarbons	Water	groundwater	ng	585.756
1351	PAH, polycyclic aromatic hydrocarbons	Water	ocean	µg	50.2509
1352	PAH, polycyclic aromatic hydrocarbons	Water	river	µg	97.4579
1353	PAH, polycyclic aromatic hydrocarbons	Soil		ng	585.756
1354	Palladium	Raw	in ground	µg	4.54109
1355	Palladium (II)	Air		ng	42.8014
1356	Paraffins	Air	low. pop.	ng	48.2062
1357	Paraquat	Air	low. pop.	ng	15.2448
1358	Paraquat	Soil	agricultural	ng	37.9667
1359	Parathion	Soil	agricultural	pg	486.724
1360	Parathion, methyl	Air	low. pop.	ng	2.92565
1361	Parathion, methyl	Soil	agricultural	pg	125.406
1362	Particulates, < 2.5 um	Air		mg	45.7573
1363	Particulates, < 2.5 um	Air	high. pop.	mg	724.076
1364	Particulates, < 2.5 um	Air	low. pop.	g	1.54166
1365	Particulates, < 2.5 um	Air	stratosphere + troposphere	pg	4.77248
1366	Particulates, > 10 um	Air		mg	76.7415
1367	Particulates, > 10 um	Air	high. pop.	mg	40.8145
1368	Particulates, > 10 um	Air	low. pop.	mg	278.009
1369	Particulates, > 2.5 um, and < 10um	Air		mg	25.8378
1370	Particulates, > 2.5 um, and < 10um	Air	high. pop.	mg	64.203
1371	Particulates, > 2.5 um, and < 10um	Air	low. pop.	g	1.32986
1372	Peat	Raw	biotic	mg	340.099
1373	Pendimethalin	Air	low. pop.	ng	160.618
1374	Pendimethalin	Water	groundwater	pg	0.854065
1375	Pendimethalin	Water	river	pg	0.00143179
1376	Pendimethalin	Soil	agricultural	ng	624.229
1377	Pentane	Air		mg	11.8406
1378	Pentane	Air	high. pop.	mg	6.1213
1379	Pentane	Air	low. pop.	mg	9.33748
1380	Pentane, 2-methyl-	Air	high. pop.	ng	7.26884
1381	Pentane, 2-methyl-	Water	river	ng	77.1249
1382	Pentane, 2,2,4-trimethyl-	Air		ng	129.42
1383	Perlite	Raw	in ground	µg	52.5439
1384	Permethrin	Air	low. pop.	ng	2.38663
1385	Permethrin	Soil	agricultural	ng	2.01311
1386	Pesticides, unspecified	Water		pg	865.873
1387	Pesticides, unspecified	Water	groundwater	ng	3.49179
1388	Pesticides, unspecified	Soil		pg	0.0184092
1389	Pesticides, unspecified	Soil	agricultural	µg	1.55556
1390	Pesticides, unspecified	Soil	forestry	ng	18.2318
1391	Phenanthrene	Air		ng	31.6914
1392	Phenanthrene	Water	river	ng	798.671
1393	Phenmedipham	Soil	agricultural	ng	191.397
1394	Phenol	Air		ng	4.05257
1395	Phenol	Air	high. pop.	µg	57.6995
1396	Phenol	Air	low. pop.	µg	893.672
1397	Phenol	Water		µg	5.45098
1398	Phenol	Water	ocean	µg	184.323
1399	Phenol	Water	river	µg	794.774
1400	Phenol, 2,4-dichloro-	Air		pg	0.116398
1401	Phenol, 2,4-dichloro-	Air	high. pop.	µg	7.14159
1402	Phenol, pentachloro-	Air		pg	8.22026
1403	Phenol, pentachloro-	Air	high. pop.	ng	122.029
1404	Phenol, pentachloro-	Air	low. pop.	µg	3.15039
1405	Phenol, pentachloro-	Soil		pg	0.0580012
1406	Phorate	Soil	agricultural	ng	13.5294
1407	Phosgene	Air		µg	22.3398
1408	Phosmet	Soil	agricultural	ng	1.48979
1409	Phosphate	Water		ng	47.9839
1410	Phosphate	Water	groundwater	mg	38.1578
1411	Phosphate	Water	ocean	mg	3.03507
1412	Phosphate	Water	river	mg	321.764
1413	Phosphine	Air	high. pop.	pg	31.6512
1414	Phosphoric acid	Air	high. pop.	pg	0.0242717
1415	Phosphoric acid	Air	low. pop.	pg	7.53485
1416	Phosphorus	Raw	in ground	g	2.48346
1417	Phosphorus	Air		ng	222.342
1418	Phosphorus	Air	high. pop.	mg	5.06599
1419	Phosphorus	Air	low. pop.	ng	491.642
1420	Phosphorus	Water		µg	26.9091
1421	Phosphorus	Water	groundwater	mg	11.9434
1422	Phosphorus	Water	ocean	ng	101.595
1423	Phosphorus	Water	river	mg	61.1978
1424	Phosphorus	Soil		µg	24.1478
1425	Phosphorus	Soil	agricultural	mg	31.5372
1426	Phosphorus	Soil	industrial	µg	27.5851
1427	Phosphorus oxychloride	Water		pg	0.74907
1428	Phosphorus trichloride	Air		ng	9.12136
1429	Phosphorus trichloride	Air	high. pop.	pg	4.29982
1430	Picloram	Soil	agricultural	pg	0.023384
1431	Picoxystrobin	Soil	agricultural	ng	164.101
1432	Picoxystrobin	Soil	forestry	pg	746.423
1433	Piperonyl butoxide	Soil	agricultural	pg	44.3901
1434	Pirimicarb	Soil	agricultural	pg	914.946
1435	Platinum	Raw	in ground	µg	2.09167
1436	Platinum	Air		ng	41.2806
1437	Platinum	Air	high. pop.	pg	97.6965
1438	Platinum	Air	low. pop.	ng	23.3141
1439	Plutonium-238	Air	low. pop.	nBq	0.286798
1440	Plutonium-alpha	Air	low. pop.	nBq	0.657448
1441	Polonium-210	Air		µBq	613.501
1442	Polonium-210	Air	high. pop.	mBq	29.5855
1443	Polonium-210	Air	low. pop.	mBq	86.0917
1444	Polonium-210	Water	groundwater	mBq	1.40186
1445	Polonium-210	Water	ocean	mBq	274.614
1446	Polonium-210	Water	river	mBq	7.27617
1447	Polychlorinated biphenyls	Air		pg	134.952
1448	Polychlorinated biphenyls	Air	high. pop.	ng	8.34971
1449	Polychlorinated biphenyls	Air	low. pop.	ng	10.8724
1450	Polychlorinated biphenyls	Water		pg	0.465915
1451	Potassium	Raw	in ground	g	10.1651
1452	Potassium-40	Air		µBq	82.5829
1453	Potassium-40	Air	high. pop.	mBq	4.63886
1454	Potassium-40	Air	low. pop.	mBq	12.3584
1455	Potassium-40	Water	groundwater	µBq	111.353
1456	Potassium-40	Water	ocean	mBq	21.7498
1457	Potassium-40	Water	river	mBq	8.95253
1458	Potassium (I)	Air		µg	47.7131
1459	Potassium (I)	Air	high. pop.	mg	364.843
1460	Potassium (I)	Air	low. pop.	µg	5.83742
1461	Potassium (I)	Water		pg	0.0126653
1462	Potassium (I)	Water	groundwater	mg	4.67052
1463	Potassium (I)	Water	ocean	mg	195.051
1464	Potassium (I)	Water	river	mg	802.961
1465	Potassium (I)	Soil		µg	268.355
1466	Potassium (I)	Soil	agricultural	mg	175.941
1467	Potassium (I)	Soil	industrial	µg	78.8274
1468	Potassium chloride	Raw	in ground	g	79.9462
1469	Praseodymium	Raw	in ground	µg	70.907
1470	Primisulfuron	Soil	agricultural	ng	1.83455
1471	Prochloraz	Soil	agricultural	ng	1.38905
1472	Procymidone	Soil	agricultural	pg	2.43715
1473	Profenofos	Soil	agricultural	µg	1.03271
1474	Prohexadione-calcium	Soil	agricultural	pg	0.01409
1475	Propamocarb HCl	Soil	agricultural	pg	64.9611
1476	Propanal	Air		µg	2.12359
1477	Propanal	Air	high. pop.	µg	22.1578
1478	Propanal	Air	low. pop.	µg	27.9096
1479	Propanal	Water	river	ng	18.9068
1480	Propane	Air		µg	6.71065
1481	Propane	Air	high. pop.	mg	1.43046
1482	Propane	Air	low. pop.	mg	40.4979
1483	Propanil	Soil	agricultural	pg	929.564
1484	Propargite	Soil	agricultural	ng	4.33949
1485	Propene	Air		ng	132.797
1486	Propene	Air	high. pop.	mg	466.765
1487	Propene	Air	low. pop.	mg	81.7888
1488	Propene	Water	river	g	1.12318
1489	Propiconazole	Air	low. pop.	ng	12.8558
1490	Propiconazole	Water		pg	38.3731
1491	Propiconazole	Water	groundwater	pg	34.0572
1492	Propiconazole	Water	river	pg	4.63786e-10
1493	Propiconazole	Soil	agricultural	ng	65.7469
1494	Propiconazole	Soil	forestry	pg	445.472
1495	Propionic acid	Air		pg	14.0271
1496	Propionic acid	Air	high. pop.	µg	105.627
1497	Propionic acid	Air	low. pop.	µg	21.5373
1498	Propionic acid	Water	river	µg	17.0987
1499	Propoxycarbazone-sodium (prop)	Soil	agricultural	pg	0.0781152
1500	Propylamine	Air	high. pop.	ng	3.12298
1501	Propylamine	Water	river	ng	7.49527
1502	Propylene oxide	Air	high. pop.	ng	30.8951
1503	Propylene oxide	Water	river	ng	68.3282
1504	Prosulfuron	Soil	agricultural	pg	330.24
1505	Protactinium-234	Air	low. pop.	mBq	1.81807
1506	Protactinium-234	Water	river	mBq	23.6332
1507	Prothioconazole	Air	low. pop.	ng	182.193
1508	Prothioconazole	Water		pg	327.45
1509	Prothioconazole	Water	groundwater	pg	59.801
1510	Prothioconazole	Water	river	pg	1.39524e-10
1511	Prothioconazole	Soil	agricultural	ng	161.895
1512	Prothioconazole	Soil	forestry	ng	10.0591
1513	Pymetrozine	Soil	agricultural	pg	415.759
1514	Pyraclostrobin	Air	low. pop.	ng	169.22
1515	Pyraclostrobin	Water		pg	199.471
1516	Pyraclostrobin	Water	groundwater	pg	105.723
1517	Pyraclostrobin	Water	river	pg	3.92874e-05
1518	Pyraclostrobin	Soil	agricultural	ng	305.834
1519	Pyraclostrobin	Soil	forestry	ng	7.85025
1520	Pyraflufen-ethyl	Soil	agricultural	ng	929.774
1521	Pyrene	Air		pg	366.23
1522	Pyrene	Water	river	ng	725.315
1523	Pyriproxyfen	Air	low. pop.	ng	19.609
1524	Pyriproxyfen	Water		pg	16.5507
1525	Pyriproxyfen	Water	groundwater	pg	3.27675
1526	Pyriproxyfen	Soil	agricultural	ng	49.722
1527	Pyriproxyfen	Soil	forestry	ng	1.44622
1528	Quinclorac	Soil	agricultural	pg	15.5255
1529	Quinmerac	Soil	agricultural	pg	5.06514e-24
1530	Quinoxyfen	Soil	agricultural	pg	0.683113
1531	Quizalofop-P	Soil	agricultural	pg	0.350587
1532	Quizalofop-P-ethyl	Air	low. pop.	ng	4.90169
1533	Quizalofop-P-ethyl	Water		pg	7.49053
1534	Quizalofop-p-ethyl	Soil	agricultural	ng	43.9867
1535	Quizalofop-p-ethyl	Soil	forestry	pg	139.189
1536	Radioactive species, alpha emitters	Water	river	mBq	15.1125
1537	Radioactive species, Nuclides, unspecified	Water	ocean	Bq	2.04161
1538	Radioactive species, Nuclides, unspecified	Water	river	mBq	7.91353
1539	Radioactive species, other beta emitters	Air		nBq	5.7488e-06
1540	Radioactive species, other beta emitters	Air	high. pop.	mBq	4.24445
1541	Radioactive species, other beta emitters	Air	low. pop.	µBq	19.82
1542	Radium-224	Water	ocean	mBq	581.307
1543	Radium-224	Water	river	Bq	1.12599
1544	Radium-226	Air		µBq	86.6555
1545	Radium-226	Air	high. pop.	mBq	4.17741
1546	Radium-226	Air	low. pop.	mBq	70.4254
1547	Radium-226	Water		µBq	2.77221
1548	Radium-226	Water	groundwater	mBq	1.03337
1549	Radium-226	Water	ocean	Bq	14.1973
1550	Radium-226	Water	river	Bq	34.9138
1551	Radium-228	Air		µBq	25.7035
1552	Radium-228	Air	high. pop.	mBq	20.8188
1553	Radium-228	Air	low. pop.	mBq	3.29638
1554	Radium-228	Water		µBq	1.16642
1555	Radium-228	Water	ocean	Bq	2.30541
1556	Radium-228	Water	river	Bq	4.46558
1557	Radon-220	Air		mBq	1.80212
1558	Radon-220	Air	high. pop.	mBq	7.56092
1559	Radon-220	Air	low. pop.	mBq	313.728
1560	Radon-222	Air		mBq	1.01215
1561	Radon-222	Air	high. pop.	mBq	4.397
1562	Radon-222	Air	low. pop.	kBq	2.98392
1563	Rhenium	Raw	in ground	ng	198.422
1564	Rhodium	Raw	in ground	ng	502.552
1565	Rhodium (III)	Air		ng	41.2806
1566	Rimsulfuron	Soil	agricultural	ng	2.03377
1567	Rubidium	Water	ocean	µg	23.0403
1568	Rubidium	Water	river	µg	44.629
1569	Ruthenium-103	Air	low. pop.	nBq	3.0849
1570	Ruthenium-103	Water	river	µBq	53.885
1571	Samarium	Raw	in ground	µg	16.9632
1572	Sand	Raw	in ground	mg	496.208
1573	Scandium	Raw	in ground	ng	223.785
1574	Scandium	Air		pg	0.575297
1575	Scandium	Air	high. pop.	ng	401.812
1576	Scandium	Air	low. pop.	ng	19.3037
1577	Scandium	Water	groundwater	µg	4.14187
1578	Scandium	Water	river	µg	22.8474
1579	Scandium	Soil		ng	508.617
1580	Scandium	Soil	agricultural	ng	680.805
1581	Selenium	Raw	in ground	µg	150.807
1582	Selenium (IV)	Air		µg	6.20265
1583	Selenium (IV)	Air	high. pop.	µg	5.48027
1584	Selenium (IV)	Air	low. pop.	µg	28.2845
1585	Selenium (IV)	Air	stratosphere + troposphere	pg	0.000297346
1586	Selenium (IV)	Water		µg	1.63307
1587	Selenium (IV)	Water	groundwater	µg	12.4016
1588	Selenium (IV)	Water	river	µg	28.6104
1589	Selenium (IV)	Soil		µg	3.42094
1590	Selenium (IV)	Soil	agricultural	ng	446.027
1591	Selenium (IV)	Soil	industrial	ng	109.732
1592	Sethoxydim	Air	low. pop.	ng	1.90689
1593	Sethoxydim	Soil	agricultural	pg	256.523
1594	Shale	Raw	in ground	g	21.5291
1595	Silicon	Raw	in ground	mg	25.5966
1596	Silicon	Air		mg	1.85798
1597	Silicon	Air	high. pop.	mg	40.6576
1598	Silicon	Air	low. pop.	µg	4.64529
1599	Silicon	Water	groundwater	mg	4.28162
1600	Silicon	Water	ocean	ng	31.7921
1601	Silicon	Water	river	mg	44.3264
1602	Silicon	Soil		mg	5.03359
1603	Silicon	Soil	agricultural	mg	266.268
1604	Silicon	Soil	industrial	mg	1.43696
1605	Silicon tetrafluoride	Air	low. pop.	µg	2.88326
1606	Silthiofam	Soil	agricultural	pg	1.04981
1607	Silver	Raw	in ground	µg	960.193
1608	Silver-110	Air	low. pop.	nBq	589.447
1609	Silver-110	Water	river	mBq	12.7987
1610	Silver (I)	Air		ng	6.13601
1611	Silver (I)	Air	high. pop.	pg	174.809
1612	Silver (I)	Air	low. pop.	ng	242.238
1613	Silver (I)	Water		ng	1.31325
1614	Silver (I)	Water	groundwater	ng	335.936
1615	Silver (I)	Water	ocean	µg	1.38242
1616	Silver (I)	Water	river	µg	6.71085
1617	Silver (I)	Soil		ng	88.3379
1618	Silver (I)	Soil	agricultural	µg	1.49478
1619	Silver (I)	Soil	industrial	ng	24.098
1620	Simazine	Air	low. pop.	pg	39.8455
1621	Simazine	Water		pg	0.0758412
1622	Simazine	Water	groundwater	pg	0.858507
1623	Simazine	Soil	agricultural	ng	37.3244
1624	Simazine	Soil	forestry	pg	1.16072
1625	Sodium	Raw	in ground	µg	245.283
1626	Sodium	Air		µg	235.168
1627	Sodium	Air	high. pop.	mg	20.6112
1628	Sodium	Air	low. pop.	µg	6.8013
1629	Sodium	Water		mg	17.7405
1630	Sodium	Water	groundwater	mg	13.2124
1631	Sodium	Water	ocean	g	5.74371
1632	Sodium	Water	river	g	40.3593
1633	Sodium	Soil		µg	173.161
1634	Sodium	Soil	agricultural	µg	439.563
1635	Sodium	Soil	industrial	µg	289.032
1636	Sodium-24	Water	river	mBq	1.88944
1637	Sodium chlorate	Air	high. pop.	µg	6.68326
1638	Sodium chloride	Raw	in ground	g	35.6813
1639	Sodium dichromate	Air	high. pop.	ng	245.307
1640	Sodium formate	Air	high. pop.	ng	6.11606
1641	Sodium formate	Water	river	ng	14.6935
1642	Sodium hydroxide	Air	high. pop.	pg	413.835
1643	Sodium nitrate	Raw	in ground	µg	1.21196
1644	Sodium sulfate	Raw	in ground	mg	9.21063
1645	Sodium tetrahydroborate	Air	high. pop.	pg	8.90814
1646	Solids, inorganic	Water		µg	1.26832
1647	Solids, inorganic	Water	groundwater	mg	86.2667
1648	Solids, inorganic	Water	ocean	pg	1.33392e-11
1649	Solids, inorganic	Water	river	mg	129.315
1650	Spinosad	Soil	agricultural	pg	8.66148
1651	Spiroxamine	Soil	agricultural	ng	4.24866
1652	Spodumene	Raw	in ground	µg	111.511
1653	Steatite	Raw	in ground	pg	166.742
1654	Strontium	Raw	in ground	µg	700.426
1655	Strontium-89	Water	river	µBq	891.513
1656	Strontium-90	Water	ocean	mBq	43.5058
1657	Strontium-90	Water	river	mBq	747.519
1658	Strontium (II)	Air		µg	14.56
1659	Strontium (II)	Air	high. pop.	µg	61.4112
1660	Strontium (II)	Air	low. pop.	µg	34.3322
1661	Strontium (II)	Water		ng	34.144
1662	Strontium (II)	Water	groundwater	µg	481.625
1663	Strontium (II)	Water	ocean	mg	20.7673
1664	Strontium (II)	Water	river	mg	31.5927
1665	Strontium (II)	Soil		µg	20.7322
1666	Strontium (II)	Soil	agricultural	µg	44.5364
1667	Strontium (II)	Soil	industrial	µg	5.80668
1668	Styrene	Air		µg	37.1381
1669	Styrene	Air	high. pop.	µg	39.3803
1670	Styrene	Air	low. pop.	µg	51.4047
1671	Sulfadiazine	Water		pg	163.318
1672	Sulfate	Air		µg	994.025
1673	Sulfate	Air	high. pop.	mg	576.331
1674	Sulfate	Air	low. pop.	µg	62.6525
1675	Sulfate	Water		mg	33.888
1676	Sulfate	Water	groundwater	mg	471.847
1677	Sulfate	Water	ocean	g	1.19441
1678	Sulfate	Water	river	g	78.2303
1679	Sulfate	Soil		µg	375.67
1680	Sulfentrazone	Air	low. pop.	ng	106.016
1681	Sulfentrazone	Water		pg	53.2924
1682	Sulfentrazone	Water	groundwater	ng	2.14488
1683	Sulfentrazone	Soil	agricultural	ng	912.975
1684	Sulfentrazone	Soil	forestry	ng	3.21913
1685	Sulfide	Water		µg	19.7017
1686	Sulfide	Water	ocean	ng	441.135
1687	Sulfide	Water	river	mg	18.2078
1688	Sulfite	Water		pg	777.47
1689	Sulfite	Water	river	µg	152.279
1690	Sulfosate	Soil	agricultural	ng	282.197
1691	Sulfosulfuron	Soil	agricultural	pg	0.297751
1692	Sulfur	Raw	in ground	mg	99.4229
1693	Sulfur	Water		µg	49.887
1694	Sulfur	Water	groundwater	µg	329.139
1695	Sulfur	Water	ocean	µg	15.0783
1696	Sulfur	Water	river	mg	708.27
1697	Sulfur	Soil		mg	1.09677
1698	Sulfur	Soil	agricultural	mg	30.2484
1699	Sulfur	Soil	industrial	mg	43.0652
1700	Sulfur dioxide	Air		mg	438.653
1701	Sulfur dioxide	Air	high. pop.	g	1.28449
1702	Sulfur dioxide	Air	low. pop.	g	1.92374
1703	Sulfur dioxide	Air	stratosphere + troposphere	pg	24.9694
1704	Sulfur hexafluoride	Air		µg	70.1657
1705	Sulfur hexafluoride	Air	high. pop.	pg	0.0536628
1706	Sulfur oxides	Air		µg	318.121
1707	Sulfur trioxide	Air		µg	28.6526
1708	Sulfur trioxide	Air	high. pop.	mg	17.8568
1709	Sulfuric acid	Air		µg	85.6581
1710	Sulfuric acid	Air	high. pop.	pg	771.313
1711	Sulfuric acid	Air	low. pop.	ng	418.696
1712	Sulfuric acid	Water	river	mg	190.905
1713	Sulfuric acid	Soil	agricultural	µg	4.62368
1714	Suspended solids, unspecified	Water		mg	104.149
1715	Suspended solids, unspecified	Water	groundwater	mg	6.88446
1716	Suspended solids, unspecified	Water	ocean	mg	4.12448
1717	Suspended solids, unspecified	Water	river	mg	55.6046
1718	t-Butyl methyl ether	Air	high. pop.	µg	9.54029
1719	t-Butyl methyl ether	Water		ng	816.475
1720	t-Butyl methyl ether	Water	river	ng	5.90342
1721	t-Butylamine	Air	high. pop.	ng	10.8397
1722	t-Butylamine	Water	river	ng	26.0152
1723	Talc	Raw	in ground	µg	131.174
1724	Tantalum	Raw	in ground	ng	30.8185
1725	Tau-fluvalinate	Soil	agricultural	pg	8.07428e-26
1726	Tebuconazole	Air	low. pop.	ng	52.8733
1727	Tebuconazole	Water		pg	107.381
1728	Tebuconazole	Water	groundwater	pg	309.082
1729	Tebuconazole	Water	river	pg	1.71788e-10
1730	Tebuconazole	Soil	agricultural	ng	114.196
1731	Tebuconazole	Soil	forestry	ng	3.59172
1732	Tebupirimphos	Soil	agricultural	ng	15.4106
1733	Tebutam	Soil	agricultural	ng	16.9895
1734	Tebuthiuron	Air	low. pop.	ng	32.0572
1735	Tebuthiuron	Water		pg	18.7952
1736	Tebuthiuron	Water	groundwater	ng	1.18643
1737	Tebuthiuron	Soil	agricultural	ng	285.98
1738	Tebuthiuron	Soil	forestry	ng	1.07961
1739	Technetium-99m	Water	river	µBq	828.17
1740	Teflubenzuron	Air	low. pop.	ng	55.9399
1741	Teflubenzuron	Water		pg	131.651
1742	Teflubenzuron	Soil	agricultural	ng	187.834
1743	Teflubenzuron	Soil	forestry	ng	3.0293
1744	Tefluthrin	Air	low. pop.	pg	0.450514
1745	Tefluthrin	Water	groundwater	pg	2.20657e-06
1746	Tefluthrin	Water	river	pg	3.67752e-08
1747	Tefluthrin	Soil	agricultural	ng	12.1091
1748	Tellurium	Raw	in ground	µg	11.9469
1749	Tellurium	Air		ng	59.7852
1750	Tellurium-123m	Water	river	µBq	341.758
1751	Tellurium-132	Water	river	µBq	15.8567
1752	Tembotrione	Soil	agricultural	pg	179.007
1753	Tembotrione	Soil	forestry	pg	1.54149
1754	Terbium	Raw	in ground	µg	1.09939
1755	Terbufos	Soil	agricultural	ng	41.0927
1756	Terbuthylazin	Soil	agricultural	µg	1.94166
1757	Terpenes	Air	low. pop.	mg	22.3032
1758	Tetrachloroethylene	Air		pg	166.197
1759	Tetrachloroethylene	Air	high. pop.	ng	4.8526
1760	Tetrachloroethylene	Air	low. pop.	ng	186.197
1761	Tetramethyl ammonium hydroxide	Air	high. pop.	pg	321.796
1762	Thallium (I)	Air		µg	1.43345
1763	Thallium (I)	Air	high. pop.	ng	503.789
1764	Thallium (I)	Air	low. pop.	ng	1.58928
1765	Thallium (I)	Water		pg	1.48812
1766	Thallium (I)	Water	groundwater	ng	56.7337
1767	Thallium (I)	Water	ocean	ng	74.6299
1768	Thallium (I)	Water	river	ng	388.812
1769	Thallium (I)	Soil		ng	31.2898
1770	Thallium (I)	Soil	agricultural	ng	32.2423
1771	Thallium (I)	Soil	industrial	ng	33.2776
1772	Thiabendazole	Air	low. pop.	pg	3.90357
1773	Thiabendazole	Water		pg	0.00501188
1774	Thiabendazole	Water	groundwater	pg	0.09733
1775	Thiabendazole	Soil	agricultural	pg	34.6252
1776	Thiabendazole	Soil	forestry	pg	0.286258
1777	Thiamethoxam	Air	low. pop.	ng	166.618
1778	Thiamethoxam	Water		pg	176.493
1779	Thiamethoxam	Water	groundwater	ng	16.2925
1780	Thiamethoxam	Soil	agricultural	µg	1.49102
1781	Thiamethoxam	Soil	forestry	ng	9.61949
1782	Thiazole, 2-(thiocyanatemethylthio)benzo-	Soil	agricultural	ng	126.147
1783	Thifensulfuron	Air	low. pop.	pg	259.887
1784	Thifensulfuron-methyl	Soil	agricultural	pg	24.2842
1785	Thiobencarb	Soil	agricultural	pg	198.948
1786	Thiocyanate, ion	Water	ocean	ng	32.9808
1787	Thiodicarb	Air	low. pop.	ng	5.4326
1788	Thiodicarb	Water		pg	7.88505
1789	Thiodicarb	Water	groundwater	pg	112.66
1790	Thiodicarb	Soil	agricultural	ng	38.9579
1791	Thiodicarb	Soil	forestry	pg	123.359
1792	Thiophanate-methyl	Air	low. pop.	ng	60.955
1793	Thiophanate-methyl	Water		pg	106.309
1794	Thiophanate-methyl	Water	groundwater	pg	250.255
1795	Thiophanate-methyl	Soil	agricultural	ng	492.238
1796	Thiophanate-methyl	Soil	forestry	ng	2.99741
1797	Thiram	Air	low. pop.	ng	7.92139
1798	Thiram	Water		pg	11.1314
1799	Thiram	Water	groundwater	pg	78.6704
1800	Thiram	Soil	agricultural	µg	281.66
1801	Thiram	Soil	forestry	ng	1.78921
1802	Thorium	Air		pg	0.690984
1803	Thorium	Air	high. pop.	ng	602.481
1804	Thorium	Air	low. pop.	ng	73.7225
1805	Thorium-228	Air		µBq	13.8271
1806	Thorium-228	Air	high. pop.	mBq	1.81003
1807	Thorium-228	Air	low. pop.	mBq	1.84226
1808	Thorium-228	Water	groundwater	µBq	11.2948
1809	Thorium-228	Water	ocean	mBq	461.071
1810	Thorium-228	Water	river	mBq	892.58
1811	Thorium-230	Air	low. pop.	mBq	29.0272
1812	Thorium-230	Water	river	Bq	2.00091
1813	Thorium-232	Air		µBq	21.7258
1814	Thorium-232	Air	high. pop.	mBq	1.20393
1815	Thorium-232	Air	low. pop.	mBq	3.33589
1816	Thorium-232	Water		µBq	24.512
1817	Thorium-232	Water	ocean	µBq	14.9186
1818	Thorium-232	Water	river	mBq	1.69801
1819	Thorium-234	Air	low. pop.	mBq	1.8196
1820	Thorium-234	Water	river	mBq	23.6495
1821	Tin	Raw	in ground	ng	818.524
1822	Tin, ion	Air		µg	187.561
1823	Tin, ion	Air	high. pop.	ng	202.17
1824	Tin, ion	Air	low. pop.	µg	7.89658
1825	Tin, ion	Water		ng	408.307
1826	Tin, ion	Water	groundwater	µg	1.14296
1827	Tin, ion	Water	ocean	pg	3.97306e-16
1828	Tin, ion	Water	river	µg	9.14566
1829	Tin, ion	Soil		ng	357.761
1830	Tin, ion	Soil	agricultural	µg	3.18475
1831	Tin, ion	Soil	industrial	µg	2.95898
1832	Titanium	Raw	in ground	mg	43.9029
1833	Titanium, ion	Air		µg	112.29
1834	Titanium, ion	Air	high. pop.	µg	122.163
1835	Titanium, ion	Air	low. pop.	µg	1.93053
1836	Titanium, ion	Water		µg	62.4894
1837	Titanium, ion	Water	groundwater	µg	59.6846
1838	Titanium, ion	Water	ocean	ng	5.27472
1839	Titanium, ion	Water	river	µg	88.8577
1840	Titanium, ion	Soil		µg	227.114
1841	Titanium, ion	Soil	agricultural	mg	4.46072
1842	Titanium, ion	Soil	industrial	µg	61.5095
1843	TOC, Total Organic Carbon	Water		mg	961.113
1844	TOC, Total Organic Carbon	Water	groundwater	µg	555.423
1845	TOC, Total Organic Carbon	Water	ocean	mg	207.219
1846	TOC, Total Organic Carbon	Water	river	g	1.44333
1847	Toluene	Air		µg	132.55
1848	Toluene	Air	high. pop.	mg	5.63527
1849	Toluene	Air	low. pop.	mg	44.7577
1850	Toluene	Water		ng	11.654
1851	Toluene	Water	ocean	µg	269.443
1852	Toluene	Water	river	µg	581.959
1853	Toluene, 2-chloro-	Air	high. pop.	µg	17.9979
1854	Toluene, 2-chloro-	Water	river	µg	37.6578
1855	Tralkoxydim	Soil	agricultural	pg	0.25725
1856	Transformation, from annual crop	Raw	land	cm2	15.2927
1857	Transformation, from annual crop, irrigated	Raw	land	mm2	36.7597
1858	Transformation, from annual crop, irrigated, intensive	Raw	land	mm2	0.000538946
1859	Transformation, from annual crop, non-irrigated	Raw	land	mm2	50.6633
1860	Transformation, from annual crop, non-irrigated, extensive	Raw	land	mm2	3.64111
1861	Transformation, from annual crop, non-irrigated, intensive	Raw	land	mm2	5.80946
1862	Transformation, from cropland fallow (non-use)	Raw	land	mm2	0.0194807
1863	Transformation, from dump site, inert material landfill	Raw	land	mm2	0.0746673
1864	Transformation, from dump site, residual material landfill	Raw	land	mm2	23.8259
1865	Transformation, from dump site, sanitary landfill	Raw	land	mm2	0.417722
1866	Transformation, from dump site, slag compartment	Raw	land	mm2	0.100841
1867	Transformation, from forest, extensive	Raw	land	mm2	40.9663
1868	Transformation, from forest, intensive	Raw	land	mm2	262.937
1869	Transformation, from forest, primary (non-use)	Raw	land	cm2	52.2501
1870	Transformation, from forest, secondary (non-use)	Raw	land	cm2	202.744
1871	Transformation, from forest, unspecified	Raw	land	mm2	5.97103
1872	Transformation, from grassland, natural (non-use)	Raw	land	mm2	1.01251
1873	Transformation, from grassland, natural, for livestock grazing	Raw	land	mm2	0.473174
1874	Transformation, from heterogeneous, agricultural	Raw	land	mm2	0.000695556
1875	Transformation, from industrial area	Raw	land	mm2	0.688105
1876	Transformation, from mineral extraction site	Raw	land	mm2	9.8707
1877	Transformation, from pasture, man made	Raw	land	mm2	38.2477
1878	Transformation, from pasture, man made, extensive	Raw	land	mm2	3.78953e-11
1879	Transformation, from pasture, man made, intensive	Raw	land	mm2	0.47351
1880	Transformation, from permanent crop	Raw	land	dm2	10.6868
1881	Transformation, from permanent crop, irrigated	Raw	land	mm2	1.02582
1882	Transformation, from permanent crop, irrigated, intensive	Raw	land	mm2	0.000258844
1883	Transformation, from permanent crop, non-irrigated	Raw	land	mm2	0.888081
1884	Transformation, from river, natural (non-use)	Raw	land	mm2	0.00322676
1885	Transformation, from seabed, infrastructure	Raw	land	mm2	0.000350198
1886	Transformation, from seabed, unspecified	Raw	land	mm2	0.739129
1887	Transformation, from shrub land, sclerophyllous	Raw	land	mm2	25.2906
1888	Transformation, from traffic area, rail/road embankment	Raw	land	mm2	2.41814
1889	Transformation, from traffic area, road network	Raw	land	mm2	3.31958e-19
1890	Transformation, from unspecified	Raw	land	mm2	19.1013
1891	Transformation, from unspecified, natural (non-use)	Raw	land	mm2	0.160753
1892	Transformation, from wetland, inland (non-use)	Raw	land	mm2	0.0392505
1893	Transformation, to annual crop	Raw	land	mm2	347.522
1894	Transformation, to annual crop, fallow	Raw	land	mm2	0.0505216
1895	Transformation, to annual crop, irrigated	Raw	land	mm2	36.7597
1896	Transformation, to annual crop, irrigated, intensive	Raw	land	mm2	0.00418101
1897	Transformation, to annual crop, non-irrigated	Raw	land	mm2	47.3984
1898	Transformation, to annual crop, non-irrigated, extensive	Raw	land	mm2	3.84361
1899	Transformation, to annual crop, non-irrigated, intensive	Raw	land	mm2	148.369
1900	Transformation, to dump site	Raw	land	mm2	8.84043
1901	Transformation, to dump site, inert material landfill	Raw	land	mm2	0.0746673
1902	Transformation, to dump site, residual material landfill	Raw	land	mm2	23.8259
1903	Transformation, to dump site, sanitary landfill	Raw	land	mm2	0.417722
1904	Transformation, to dump site, slag compartment	Raw	land	mm2	0.100841
1905	Transformation, to forest, extensive	Raw	land	mm2	39.4167
1906	Transformation, to forest, intensive	Raw	land	mm2	271.444
1907	Transformation, to forest, secondary (non-use)	Raw	land	mm2	3.911e-19
1908	Transformation, to forest, unspecified	Raw	land	mm2	26.5679
1909	Transformation, to grassland, natural (non-use)	Raw	land	mm2	0.000184759
1910	Transformation, to grassland, natural, for livestock grazing	Raw	land	mm2	3.06893e-11
1911	Transformation, to heterogeneous, agricultural	Raw	land	mm2	0.0254846
1912	Transformation, to industrial area	Raw	land	mm2	2.76556
1913	Transformation, to inland waterbody, unspecified	Raw	land	mm2	6.84742e-05
1914	Transformation, to mineral extraction site	Raw	land	mm2	11.8574
1915	Transformation, to pasture, man made	Raw	land	mm2	6.57502
1916	Transformation, to pasture, man made, extensive	Raw	land	mm2	3.78953e-11
1917	Transformation, to pasture, man made, intensive	Raw	land	mm2	0.00176959
1918	Transformation, to permanent crop	Raw	land	dm2	13.3412
1919	Transformation, to permanent crop, irrigated	Raw	land	mm2	1.02582
1920	Transformation, to permanent crop, irrigated, intensive	Raw	land	mm2	0.000258844
1921	Transformation, to permanent crop, non-irrigated	Raw	land	mm2	0.888081
1922	Transformation, to seabed, drilling and mining	Raw	land	mm2	0.738276
1923	Transformation, to seabed, infrastructure	Raw	land	mm2	0.00085284
1924	Transformation, to seabed, unspecified	Raw	land	mm2	0.000350198
1925	Transformation, to shrub land, sclerophyllous	Raw	land	mm2	24.4191
1926	Transformation, to traffic area, rail network	Raw	land	mm2	0.00056967
1927	Transformation, to traffic area, rail/road embankment	Raw	land	mm2	2.49639
1928	Transformation, to traffic area, road network	Raw	land	mm2	0.0517149
1929	Transformation, to unspecified	Raw	land	mm2	1.95296
1930	Transformation, to unspecified, natural (non-use)	Raw	land	mm2	0.000103817
1931	Transformation, to urban, discontinuously built	Raw	land	mm2	0.00222908
1932	Transformation, to urban/industrial fallow (non-use)	Raw	land	mm2	0.0422669
1933	Transformation, to water bodies, artificial	Raw	land	mm2	8.72512
1934	Transformation, to wetland, inland (non-use)	Raw	land	mm2	1.23848e-18
1935	Triadimenol	Soil	agricultural	pg	310.769
1936	Triallate	Soil	agricultural	pg	0.631377
1937	Triasulfuron	Soil	agricultural	pg	0.187074
1938	Tribenuron	Soil	agricultural	pg	32.3028
1939	Tribenuron-methyl	Soil	agricultural	pg	6.5216
1940	Tributyltin compounds	Water	ocean	ng	301.844
1941	Trichlorfon	Soil	agricultural	ng	774.535
1942	Trichloroethylene	Air		µg	1.62089
1943	Triclopyr	Soil	agricultural	ng	70.0566
1944	Triethylene glycol	Water		ng	158.08
1945	Trifloxystrobin	Air	low. pop.	ng	220.637
1946	Trifloxystrobin	Water		pg	395.191
1947	Trifloxystrobin	Water	groundwater	pg	109.984
1948	Trifloxystrobin	Water	river	pg	4.29726e-11
1949	Trifloxystrobin	Soil	agricultural	ng	350.953
1950	Trifloxystrobin	Soil	forestry	ng	12.369
1951	Triflumuron	Air	low. pop.	ng	21.4068
1952	Triflumuron	Water		pg	32.6507
1953	Triflumuron	Water	groundwater	pg	49.9356
1954	Triflumuron	Soil	agricultural	ng	126.066
1955	Triflumuron	Soil	forestry	ng	1.07929
1956	Trifluralin	Air	low. pop.	ng	262.631
1957	Trifluralin	Soil	agricultural	µg	1.78187
1958	Trimethylamine	Air	high. pop.	ng	6.71863
1959	Trimethylamine	Water	river	ng	16.1247
1960	Trinexapac-ethyl	Soil	agricultural	ng	2.60359
1961	Trioctyltin	Water	ocean	pg	4.07494e-17
1962	Triphenyltin	Water	ocean	pg	1.73185e-17
1963	Tungsten	Air	low. pop.	ng	2.47061
1964	Tungsten	Water	groundwater	µg	4.77012
1965	Tungsten	Water	river	µg	20.7753
1966	Tungsten	Soil	agricultural	ng	220.03
1967	Ulexite	Raw	in ground	µg	10.9321
1968	Uranium	Raw	in ground	mg	6.298
1969	Uranium	Air		pg	0.879877
1970	Uranium	Air	high. pop.	ng	801.542
1971	Uranium	Air	low. pop.	pg	970.724
1972	Uranium-234	Air	low. pop.	mBq	36.5211
1973	Uranium-234	Water	river	mBq	27.3532
1974	Uranium-235	Air	low. pop.	µBq	488.297
1975	Uranium-235	Water	river	mBq	30.52
1976	Uranium-238	Air		µBq	72.2129
1977	Uranium-238	Air	high. pop.	mBq	3.48045
1978	Uranium-238	Air	low. pop.	mBq	43.9116
1979	Uranium-238	Water		µBq	44.9691
1980	Uranium-238	Water	groundwater	µBq	472.671
1981	Uranium-238	Water	ocean	mBq	93.4722
1982	Uranium-238	Water	river	mBq	60.8243
1983	Uranium alpha	Air	low. pop.	mBq	55.6211
1984	Uranium alpha	Water	river	mBq	922.099
1985	Urea	Water		pg	497.81
1986	Urea	Water	river	ng	30.0499
1987	Vanadium	Raw	in ground	µg	8.20469
1988	Vanadium (V)	Air		µg	425.932
1989	Vanadium (V)	Air	high. pop.	µg	252.899
1990	Vanadium (V)	Air	low. pop.	µg	14.4434
1991	Vanadium (V)	Water		ng	816.503
1992	Vanadium (V)	Water	groundwater	µg	4.88116
1993	Vanadium (V)	Water	ocean	ng	14.9762
1994	Vanadium (V)	Water	river	µg	36.1238
1995	Vanadium (V)	Soil		µg	4.04746
1996	Vanadium (V)	Soil	agricultural	µg	130.82
1997	Vanadium (V)	Soil	industrial	µg	84.874
1998	Vinclozolin	Soil	agricultural	pg	0.812375
1999	VOC, volatile organic compounds, unspecified origin	Air		mg	1.2811
[truncated: 871 more rows]

## Sheet: Enzymatic
No	Substance	Compartment	Subcompartment	Unit	Total
1	1-Butanol	Air	high. pop.	µg	1.78184
2	1-Butanol	Water		pg	20.3215
3	1-Butanol	Water	river	µg	9.44278
4	1-Methyl-2-pyrrolidinone	Air		pg	3.01151
5	1-Pentanol	Air	high. pop.	ng	-1.17026
6	1-Pentanol	Water	river	ng	-2.80868
7	1-Pentene	Air	high. pop.	ng	-0.455018
8	1-Pentene	Water	river	ng	-2.12249
9	1-Propanol	Air	high. pop.	ng	310.47
10	1-Propanol	Air	low. pop.	pg	0.300786
11	1-Propanol	Water	river	ng	-14.8719
12	1,3-Dioxolan-2-one	Water		µg	5.08809
13	1,4-Butanediol	Air	high. pop.	µg	3.77448
14	1,4-Butanediol	Air	low. pop.	pg	20.9856
15	1,4-Butanediol	Water	river	µg	8.68131
16	2-Aminopropanol	Air	high. pop.	ng	-1.56791
17	2-Aminopropanol	Water	river	ng	-3.7595
18	2-Butene, 2-methyl-	Air	high. pop.	pg	-1.09766
19	2-Butene, 2-methyl-	Water	river	pg	-2.63442
20	2-Chlorobenzaldehyde	Water		pg	21.9257
21	2-Methyl-1-propanol	Air	high. pop.	µg	1.5166
22	2-Methyl-1-propanol	Air	low. pop.	pg	303.903
23	2-Methyl-1-propanol	Water	river	µg	3.6399
24	2-Methyl-4-chlorophenoxyacetic acid	Air	low. pop.	pg	-310.233
25	2-Methyl-4-chlorophenoxyacetic acid	Water	groundwater	pg	-908.453
26	2-Methyl-4-chlorophenoxyacetic acid	Water	river	pg	-0.312703
27	2-Methyl-4-chlorophenoxyacetic acid	Soil	agricultural	µg	-3.9013
28	2-Nitrobenzoic acid	Air	high. pop.	ng	-4.39473
29	2-Propanol	Air		µg	2.45097
30	2-Propanol	Air	high. pop.	µg	1.92748
31	2-Propanol	Air	low. pop.	ng	4.76629
32	2-Propanol	Water		ng	41.4742
33	2-Propanol	Water	river	ng	975.844
34	2,4-D	Air	low. pop.	µg	-1.19049
35	2,4-D	Water		ng	2.68231
36	2,4-D	Water	groundwater	ng	255.504
37	2,4-D	Soil	agricultural	mg	22.7706
38	2,4-D	Soil	forestry	ng	45.0669
39	2,4-D ester	Air	low. pop.	pg	10.0101
40	2,4-D ester	Water	groundwater	pg	1.17278
41	2,4-D ester	Water	river	pg	0.00448725
42	2,4-D ester	Soil	agricultural	pg	45.982
43	2,4-D, dimethylamine salt	Air	low. pop.	pg	0.857402
44	2,4-D, dimethylamine salt	Water	groundwater	pg	5.32973
45	2,4-D, dimethylamine salt	Water	river	pg	0.0217824
46	2,4-D, dimethylamine salt	Soil	agricultural	pg	171.015
47	2,4-Di-tert-butylphenol	Water		pg	73.4209
48	4-Methyl-2-pentanol	Water	river	ng	5.92131
49	4-Methyl-2-pentanone	Air	high. pop.	ng	167.355
50	4-Methyl-2-pentanone	Air	low. pop.	pg	104.164
51	4-Methyl-2-pentanone	Water		ng	13.2406
52	4-Methyl-2-pentanone	Water	river	µg	1.14811
53	Abamectin	Air	low. pop.	ng	2.70117
54	Abamectin	Water		pg	5.02976
55	Abamectin	Water	groundwater	pg	204.916
56	Abamectin	Soil	agricultural	ng	32.1466
57	Abamectin	Soil	forestry	pg	87.5551
58	Acenaphthene	Air		ng	277.575
59	Acenaphthene	Air	high. pop.	pg	3.20409e-07
60	Acenaphthene	Air	low. pop.	ng	3.0839
61	Acenaphthene	Water	ocean	ng	94.5596
62	Acenaphthene	Water	river	ng	398.733
63	Acenaphthylene	Air		ng	8.05455
64	Acenaphthylene	Water	ocean	ng	46.8297
65	Acenaphthylene	Water	river	ng	92.4311
66	Acephate	Air	low. pop.	µg	1.84427
67	Acephate	Water		ng	2.69603
68	Acephate	Water	groundwater	ng	29.5766
69	Acephate	Soil	agricultural	µg	8.19256
70	Acephate	Soil	forestry	ng	102.49
71	Acetaldehyde	Air		µg	319.208
72	Acetaldehyde	Air	high. pop.	mg	1.0248
73	Acetaldehyde	Air	low. pop.	mg	88.9182
74	Acetaldehyde	Water	river	µg	578.024
75	Acetamide	Air	low. pop.	ng	-61.2926
76	Acetamide	Soil	agricultural	ng	14.765
77	Acetamiprid	Air	low. pop.	ng	51.587
78	Acetamiprid	Water		pg	21.1651
79	Acetamiprid	Water	groundwater	pg	27.7308
80	Acetamiprid	Soil	agricultural	ng	96.4202
81	Acetamiprid	Soil	forestry	ng	4.71819
82	Acetic acid	Air		µg	229.732
83	Acetic acid	Air	high. pop.	µg	663.706
84	Acetic acid	Air	low. pop.	mg	286.818
85	Acetic acid	Water		pg	16.464
86	Acetic acid	Water	river	mg	1.24423
87	Acetochlor	Soil	agricultural	µg	3.51066
88	Acetone	Air		µg	1.74499
89	Acetone	Air	high. pop.	µg	85.7588
90	Acetone	Air	low. pop.	mg	84.708
91	Acetone	Water		ng	31.6004
92	Acetone	Water	river	µg	24.2171
93	Acetonitrile	Air	low. pop.	mg	24.5709
94	Acetonitrile	Water	river	ng	-8.69762
95	Acetyl chloride	Water	river	ng	-2.2064
96	Acidity, unspecified	Water		ng	664.021
97	Acidity, unspecified	Water	river	µg	195.922
98	Acifluorfen	Air	low. pop.	ng	-34.1798
99	Acifluorfen	Soil	agricultural	ng	-1.46513
100	Aclonifen	Soil	agricultural	pg	-121.462
101	Acrinathrin	Soil	agricultural	pg	0.194555
102	Acrolein	Air		µg	105.213
103	Acrolein	Air	high. pop.	µg	10.2517
104	Acrolein	Air	low. pop.	µg	10.3701
105	Acrolein	Water		pg	78.8712
106	Acrylate	Water	river	ng	43.6973
107	Acrylic acid	Air	high. pop.	ng	18.463
108	Acrylonitrile	Air		pg	562.729
109	Acrylonitrile	Water		pg	13.5031
110	Actinides, radioactive, unspecified	Air	low. pop.	mBq	8.50419
111	Actinides, radioactive, unspecified	Water	ocean	mBq	3.06155
112	Aerosols, radioactive, unspecified	Air	low. pop.	µBq	439.447
113	Alachlor	Air	low. pop.	ng	-241.884
114	Alachlor	Soil	agricultural	ng	56.5868
115	Aldehydes, unspecified	Air		ng	319.41
116	Aldehydes, unspecified	Air	high. pop.	ng	38.4024
117	Aldehydes, unspecified	Air	low. pop.	µg	6.30307
118	Aldicarb	Soil	agricultural	ng	106.175
119	Aldrin	Soil	agricultural	µg	6.11731
120	Alkylbenzene (C10-C15)	Air	low. pop.	ng	78.74
121	Alkylbenzene (C10-C15)	Soil	agricultural	ng	600.312
122	Alkylbenzene (C10-C15)	Soil	forestry	ng	1.6744
123	Allyl chloride	Water		µg	-1.21142
124	Alpha-cypermethrin	Air	low. pop.	ng	8.9747
125	Alpha-cypermethrin	Water		pg	13.7441
126	Alpha-cypermethrin	Soil	agricultural	ng	86.1588
127	Alpha-cypermethrin	Soil	forestry	pg	254.881
128	Aluminium	Raw	in ground	mg	120.217
129	Aluminium	Air		mg	1.04599
130	Aluminium	Air	high. pop.	µg	698.703
131	Aluminium	Air	low. pop.	ng	927.907
132	Aluminium	Water		µg	58.2943
133	Aluminium	Water	groundwater	µg	24.9473
134	Aluminium	Water	ocean	µg	14.2616
135	Aluminium	Water	river	µg	23.3786
136	Aluminium	Soil		µg	555.717
137	Aluminium	Soil	agricultural	µg	566.063
138	Aluminium	Soil	industrial	µg	61.6732
139	Aluminium (III)	Air		mg	9.35198
140	Aluminium (III)	Air	high. pop.	mg	3.16247
141	Aluminium (III)	Air	low. pop.	mg	2.60396
142	Aluminium (III)	Water		µg	3.91882
143	Aluminium (III)	Water	groundwater	µg	522.331
144	Aluminium (III)	Water	ocean	µg	18.6074
145	Aluminium (III)	Water	river	mg	3.34747
146	Aluminium (III)	Soil		mg	2.78766
147	Aluminium (III)	Soil	agricultural	mg	62.2433
148	Aluminium (III)	Soil	industrial	µg	429.769
149	Aluminium hydroxide	Water		ng	4.39362
150	Ametryn	Soil	agricultural	ng	2.27956
151	Amidosulfuron	Soil	agricultural	pg	52.3739
152	Amine oxides	Air		pg	93.7025
153	Ammonia	Air		mg	21.8189
154	Ammonia	Air	high. pop.	mg	41.8779
155	Ammonia	Air	low. pop.	g	2.60625
156	Ammonia	Soil	industrial	µg	1.50439
157	Ammonium carbonate	Air	high. pop.	µg	19.2183
158	Ammonium sulfate	Water		ng	36.2303
159	Ammonium, ion	Water		mg	64.1611
160	Ammonium, ion	Water	groundwater	µg	224.199
161	Ammonium, ion	Water	ocean	mg	6.47915
162	Ammonium, ion	Water	river	mg	17.6739
163	Anhydrite	Raw	in ground	µg	901.302
164	Aniline	Air	high. pop.	µg	41.9586
165	Aniline	Water		µg	12.7342
166	Aniline	Water	groundwater	pg	8.07836
167	Aniline	Water	river	µg	100.708
168	Anthracene	Air		pg	48.3663
169	Anthracene	Water	river	ng	45.348
170	Anthranilic acid	Air	high. pop.	ng	-3.42776
171	Anthraquinone	Soil	agricultural	µg	-1.12221
172	Antimony	Raw	in ground	µg	12.4831
173	Antimony-122	Water	river	µBq	152.611
174	Antimony-124	Air	low. pop.	nBq	95.7276
175	Antimony-124	Water	river	mBq	48.4837
176	Antimony-125	Air	low. pop.	µBq	3.95032
177	Antimony-125	Water	river	mBq	7.32745
178	Antimony, ion	Air		mg	2.39251
179	Antimony, ion	Air	high. pop.	µg	5.95492
180	Antimony, ion	Air	low. pop.	µg	8.0586
181	Antimony, ion	Water		ng	35.3886
182	Antimony, ion	Water	groundwater	µg	11.1771
183	Antimony, ion	Water	river	µg	280.453
184	Antimony, ion	Soil		ng	410.202
185	Antimony, ion	Soil	agricultural	ng	449.033
186	Antimony, ion	Soil	industrial	µg	1.43077
187	AOX, Adsorbable Organic Halogen	Water		µg	7.87857
188	AOX, Adsorbable Organic Halogen	Water	groundwater	pg	140.297
189	AOX, Adsorbable Organic Halogen	Water	ocean	ng	42.6644
190	AOX, Adsorbable Organic Halogen	Water	river	µg	10.5824
191	Argon-40/kg	Raw	in air	mg	580.336
192	Argon-40/kg	Air		mg	5.69314
193	Argon-41	Air	low. pop.	mBq	101.359
194	Arsenic	Raw	in ground	µg	8.75275
195	Arsenic, ion	Air		µg	14.4431
196	Arsenic, ion	Air	high. pop.	µg	29.2634
197	Arsenic, ion	Air	low. pop.	µg	75.9932
198	Arsenic, ion	Water		ng	847.126
199	Arsenic, ion	Water	groundwater	µg	121.081
200	Arsenic, ion	Water	ocean	µg	2.0058
201	Arsenic, ion	Water	river	µg	760.014
202	Arsenic, ion	Soil		ng	975.972
203	Arsenic, ion	Soil	agricultural	µg	20.8324
204	Arsenic, ion	Soil	industrial	ng	175.063
205	Arsine	Air	high. pop.	pg	0.215229
206	Asulam	Soil	agricultural	µg	2.11662
207	Atrazine	Air	low. pop.	ng	-190.128
208	Atrazine	Water		pg	2.35222
209	Atrazine	Water	groundwater	pg	120.231
210	Atrazine	Water	river	pg	0.356396
211	Atrazine	Soil	agricultural	µg	305.134
212	Atrazine	Soil	forestry	pg	52.8546
213	Azadirachtin	Soil	agricultural	ng	577.335
214	Azinphos-methyl	Soil	agricultural	ng	5.04295
215	Azoxystrobin	Air	low. pop.	ng	97.3284
216	Azoxystrobin	Water		pg	304.707
217	Azoxystrobin	Water	groundwater	ng	1.14855
218	Azoxystrobin	Soil	agricultural	µg	0.390015
219	Azoxystrobin	Soil	forestry	ng	9.9099
220	Barite	Raw	in ground	µg	148.728
221	Barite	Water		µg	497.998
222	Barite	Water	ocean	µg	870.042
223	Barium	Raw	in ground	mg	75.5896
224	Barium-140	Air	low. pop.	µBq	13.4348
225	Barium-140	Water	river	µBq	34.82
226	Barium (II)	Air		µg	925.484
227	Barium (II)	Air	high. pop.	µg	47.7512
228	Barium (II)	Air	low. pop.	µg	34.6533
229	Barium (II)	Water		µg	452.579
230	Barium (II)	Water	groundwater	µg	24.7959
231	Barium (II)	Water	ocean	mg	5.17083
232	Barium (II)	Water	river	mg	10.3072
233	Barium (II)	Soil		µg	32.2205
234	Barium (II)	Soil	agricultural	µg	37.238
235	Barium (II)	Soil	industrial	µg	38.4461
236	Barium sulfide	Water		pg	-95.3812
237	Basalt	Raw	in ground	mg	2.01812
238	Benfluralin	Soil	agricultural	pg	302.387
239	Benomyl	Soil	agricultural	µg	145.968
240	Bensulfuron methyl ester	Soil	agricultural	pg	8.67075
241	Bentazone	Air	low. pop.	ng	-104.831
242	Bentazone	Water	groundwater	ng	-1.93801
243	Bentazone	Water	river	pg	-1.20102
244	Bentazone	Soil	agricultural	ng	-55.3912
245	Benzal chloride	Air		pg	2.69846
246	Benzal chloride	Air	high. pop.	ng	60.9372
247	Benzal chloride	Water	river	ng	146.247
248	Benzaldehyde	Air		µg	81.025
249	Benzaldehyde	Air	high. pop.	µg	5.34663
250	Benzaldehyde	Air	low. pop.	µg	95.4337
251	Benzaldehyde	Water		pg	9.10304
252	Benzene	Air		µg	666.53
253	Benzene	Air	high. pop.	mg	14.08
254	Benzene	Air	low. pop.	mg	55.9814
255	Benzene	Air	stratosphere + troposphere	pg	-17.9376
256	Benzene	Water		µg	5.79693
257	Benzene	Water	ocean	µg	149.531
258	Benzene	Water	river	µg	491.281
259	Benzene, 1-methyl-2-nitro-	Air	high. pop.	ng	-3.79492
260	Benzene, 1,2-dichloro-	Air	high. pop.	ng	43.0879
261	Benzene, 1,2-dichloro-	Water	river	µg	-0.171217
262	Benzene, chloro-	Water	river	µg	7.69181
263	Benzene, ethyl-	Air		µg	6.61288
264	Benzene, ethyl-	Air	high. pop.	µg	447.235
265	Benzene, ethyl-	Air	low. pop.	mg	3.31112
266	Benzene, ethyl-	Water		ng	297.664
267	Benzene, ethyl-	Water	ocean	µg	53.7901
268	Benzene, ethyl-	Water	river	µg	106.493
269	Benzene, hexachloro-	Air		ng	1.88041
270	Benzene, hexachloro-	Air	high. pop.	pg	884.215
271	Benzene, hexachloro-	Air	low. pop.	pg	4.43565e-05
272	Benzene, hexachloro-	Water		pg	0.879957
273	Benzene, pentachloro-	Air		pg	6.29985e-05
274	Benzene, pentachloro-	Air	high. pop.	ng	1.97904
275	Benzene, pentachloro-	Water		pg	1.44393
276	Benzene, pentachloronitro-	Soil	agricultural	ng	51.9818
277	Benzo(a)anthracene	Air		pg	52.9411
278	Benzo(a)anthracene	Water	river	pg	171.125
279	Benzo(a)pyrene	Air		ng	168.416
280	Benzo(a)pyrene	Air	high. pop.	µg	7.07936
281	Benzo(a)pyrene	Air	low. pop.	µg	7.85384
282	Benzo(a)pyrene	Water	river	pg	20.7916
283	Benzo(b)fluoranthene	Air		pg	23.2764
284	Benzo(b)fluoranthene	Water	river	pg	20.2783
285	Benzo(g,h,i)perylene	Air		pg	19.4103
286	Benzo(g,h,i)perylene	Water	river	pg	2.8535
287	Benzo(k)fluoranthene	Air		pg	16.343
288	Benzo(k)fluoranthene	Water	river	pg	9.54019
289	Benzovindiflupyr	Water		pg	56.8115
290	Benzovindiflupyr	Water	groundwater	pg	3.52846e-08
291	Benzovindiflupyr	Soil	agricultural	pg	3.17649e-07
292	Benzovindiflupyr	Soil	forestry	ng	1.61123
293	Benzyl alcohol	Water	river	pg	44.9275
294	Beryllium	Raw	in ground	ng	10.517
295	Beryllium (II)	Air		ng	133.278
296	Beryllium (II)	Air	high. pop.	ng	461.707
297	Beryllium (II)	Air	low. pop.	ng	104.618
298	Beryllium (II)	Water		ng	31.5168
299	Beryllium (II)	Water	groundwater	ng	474.579
300	Beryllium (II)	Water	river	ng	283.414
301	Beryllium (II)	Soil		ng	196.544
302	Beryllium (II)	Soil	agricultural	ng	23.2703
303	Beryllium (II)	Soil	industrial	ng	38.1238
304	Beta-cyfluthrin	Air	low. pop.	ng	1.67513
305	Beta-cyfluthrin	Water		pg	16.8982
306	Beta-cyfluthrin	Water	groundwater	pg	0.1484
307	Beta-cyfluthrin	Soil	agricultural	ng	28.4645
308	Beta-cyfluthrin	Soil	forestry	pg	264.514
309	Bicarbonate, ion	Water		pg	819.607
310	Bicarbonate, ion	Water	ocean	mg	100.46
311	Bifenox	Soil	agricultural	ng	-287.414
312	Bifenthrin	Air	low. pop.	ng	18.5215
313	Bifenthrin	Water		pg	56.492
314	Bifenthrin	Water	groundwater	pg	0.083582
315	Bifenthrin	Soil	agricultural	ng	38.2562
316	Bifenthrin	Soil	forestry	pg	552.664
317	Bisphenol A	Water		ng	-40.3899
318	Bitertanol	Soil	agricultural	ng	-121.196
319	BOD5 (Biological Oxygen Demand)	Water		g	2.66347
320	BOD5 (Biological Oxygen Demand)	Water	groundwater	µg	134.488
321	BOD5 (Biological Oxygen Demand)	Water	ocean	mg	234.882
322	BOD5 (Biological Oxygen Demand)	Water	river	g	1.58796
323	Borate	Water		ng	45.3542
324	Borate	Water	river	µg	-0.460172
325	Borax	Raw	in ground	µg	10.704
326	Boric acid	Air	high. pop.	pg	0.0054531
327	Boron	Raw	in ground	mg	2.14754
328	Boron	Air		µg	1.87582
329	Boron	Air	high. pop.	µg	340.208
330	Boron	Air	low. pop.	µg	638.129
331	Boron	Water		µg	24.3619
332	Boron	Water	groundwater	µg	42.6056
333	Boron	Water	ocean	mg	3.63924
334	Boron	Water	river	mg	1.36588
335	Boron	Soil		µg	5.53431
336	Boron	Soil	agricultural	µg	3.48155
337	Boron	Soil	industrial	ng	710.174
338	Boron trifluoride	Air	high. pop.	pg	37.1489
339	Boscalid	Soil	agricultural	pg	91.936
340	Bromacil	Soil	agricultural	pg	89.249
341	Bromate	Water	river	mg	4.0331
342	Bromide	Water	river	mg	24.7066
343	Bromine	Raw	in water	mg	21.8757
344	Bromine	Air		µg	16.0974
345	Bromine	Air	high. pop.	µg	874.91
346	Bromine	Air	low. pop.	µg	178.519
347	Bromine	Water		µg	676.963
348	Bromine	Water	groundwater	µg	17.6826
349	Bromine	Water	ocean	mg	1.40302
350	Bromine	Water	river	mg	3.50757
351	Bromine	Soil		µg	2.74181
352	Bromine	Soil	industrial	µg	1.72637
353	Bromopropane	Air		pg	123.585
354	Bromopropane	Water		pg	4.3707
355	Bromoxynil	Air	low. pop.	pg	-303.602
356	Bromoxynil	Water	groundwater	pg	-79.8719
357	Bromoxynil	Water	river	pg	0.0110717
358	Bromoxynil	Soil	agricultural	ng	-414.048
359	Bromuconazole	Soil	agricultural	pg	0.488265
360	Buprofezin	Soil	agricultural	pg	19.5317
361	Butadiene	Air		ng	312.152
362	Butadiene	Air	high. pop.	ng	-0.451294
363	Butadiene	Air	low. pop.	pg	-4.59199
364	Butadiene	Air	stratosphere + troposphere	pg	-16.993
365	Butane	Air		µg	23.676
366	Butane	Air	high. pop.	mg	2.01861
367	Butane	Air	low. pop.	mg	17.4682
368	Butene	Air		ng	22.0933
369	Butene	Air	high. pop.	µg	17.0396
370	Butene	Water	river	µg	6.78214
371	Butyl acetate	Water	river	µg	6.87183
372	Butylcarbamate, iodopropynyl	Air	low. pop.	pg	1.38657
373	Butylcarbamate, iodopropynyl	Water	river	pg	5.61965
374	Butyric acid, 4-(2,4-dichlorophenoxy)-	Air	low. pop.	pg	-113.547
375	Butyric acid, 4-(2,4-dichlorophenoxy)-	Water	groundwater	pg	-809.202
376	Butyric acid, 4-(2,4-dichlorophenoxy)-	Water	river	pg	-3.31767
377	Butyric acid, 4-(2,4-dichlorophenoxy)-	Soil	agricultural	ng	-26.0414
378	Butyrolactone	Water		pg	61.9349
379	Cadmium	Raw	in ground	µg	189.578
380	Cadmium (II)	Air		µg	19.2566
381	Cadmium (II)	Air	high. pop.	µg	12.6363
382	Cadmium (II)	Air	low. pop.	µg	21.8843
383	Cadmium (II)	Air	stratosphere + troposphere	pg	0.106688
384	Cadmium (II)	Water		ng	237.934
385	Cadmium (II)	Water	groundwater	µg	2.02112
386	Cadmium (II)	Water	ocean	µg	1.19922
387	Cadmium (II)	Water	river	µg	230.426
388	Cadmium (II)	Soil		ng	661.14
389	Cadmium (II)	Soil	agricultural	µg	56.5713
390	Cadmium (II)	Soil	forestry	ng	252.972
391	Cadmium (II)	Soil	industrial	µg	3.45152
392	Calcite	Raw	in ground	g	30.9262
393	Calcium	Raw	in ground	mg	205.724
394	Calcium	Air		µg	255.573
395	Calcium	Air	high. pop.	mg	84.9581
396	Calcium	Air	low. pop.	mg	1.8361
397	Calcium	Water		mg	10.2653
398	Calcium	Water	groundwater	mg	28.3638
399	Calcium	Water	ocean	mg	713.248
400	Calcium	Water	river	g	1.13007
401	Calcium	Soil		µg	725.035
402	Calcium	Soil	agricultural	mg	854.47
403	Calcium	Soil	industrial	µg	743.29
404	Captan	Soil	agricultural	ng	37.8514
405	Carbamic acid, [(dibutylamino)thio]methyl-, 2,3-dihydro-2,2-dimethyl-7-benzofuranyl ester	Soil	agricultural	pg	32.5936
406	Carbaryl	Air	low. pop.	ng	-28.5525
407	Carbaryl	Water	groundwater	pg	0.0107145
408	Carbaryl	Water	river	pg	0.000133427
409	Carbaryl	Soil	agricultural	ng	1.0221
410	Carbendazim	Air	low. pop.	ng	619.541
411	Carbendazim	Water		ng	1.1504
412	Carbendazim	Water	groundwater	ng	9.39395
413	Carbendazim	Soil	agricultural	µg	4.79361
414	Carbendazim	Soil	forestry	ng	32.1542
415	Carbetamide	Soil	agricultural	ng	6.36949
416	Carbofuran	Soil	agricultural	mg	80.0252
417	Carbon	Air	high. pop.	ng	41.5316
418	Carbon	Water		pg	-0.120794
419	Carbon	Water	groundwater	ng	142.118
420	Carbon	Soil		µg	336.787
421	Carbon	Soil	agricultural	g	1.66819
422	Carbon	Soil	industrial	mg	20.3543
423	Carbon-14	Air	low. pop.	Bq	4.27683
424	Carbon-14	Water	river	mBq	4.59061
425	Carbon dioxide	Air		g	1.72697
426	Carbon dioxide, biogenic	Air		mg	510.06
427	Carbon dioxide, biogenic	Air	high. pop.	kg	1.88559
428	Carbon dioxide, biogenic	Air	low. pop.	g	13.0108
429	Carbon dioxide, fossil	Air		g	130.362
430	Carbon dioxide, fossil	Air	high. pop.	g	769.121
431	Carbon dioxide, fossil	Air	low. pop.	g	308.203
432	Carbon dioxide, fossil	Air	stratosphere + troposphere	µg	33.1978
433	Carbon dioxide, in air	Raw	in air	kg	4.66528
434	Carbon dioxide, land transformation	Air		kg	2.12184
435	Carbon dioxide, land transformation	Air	low. pop.	kg	1.12154
436	Carbon dioxide, non-fossil, resource correction	Raw	in air	g	8.24993
437	Carbon dioxide, to soil or biomass stock	Soil		g	11.7393
438	Carbon dioxide, to soil or biomass stock	Soil	agricultural	mg	15.813
439	Carbon disulfide	Air		pg	297.126
440	Carbon disulfide	Air	high. pop.	ng	36.2408
441	Carbon disulfide	Air	low. pop.	mg	1.02303
442	Carbon disulfide	Water	river	ng	51.3572
443	Carbon monoxide, biogenic	Air		mg	2.92419
444	Carbon monoxide, biogenic	Air	high. pop.	mg	146.057
445	Carbon monoxide, biogenic	Air	low. pop.	mg	164.862
446	Carbon monoxide, fossil	Air		mg	198.943
447	Carbon monoxide, fossil	Air	high. pop.	mg	530.111
448	Carbon monoxide, fossil	Air	low. pop.	mg	663.746
449	Carbon monoxide, fossil	Air	stratosphere + troposphere	ng	20.53
450	Carbon monoxide, land transformation	Air	low. pop.	g	14.1965
451	Carbon, organic, in soil or biomass stock	Raw	in ground	g	319.009
452	Carbonate	Water		µg	111.341
453	Carbonate	Water	ocean	mg	12.0212
454	Carbonate	Water	river	mg	34.3429
455	Carbonyl sulfide	Air		µg	58.5179
456	Carboxin	Water	groundwater	pg	1.59515e-08
457	Carboxin	Soil	agricultural	pg	1.43105e-07
458	Carboxylic acids, unspecified	Water		pg	106.352
459	Carboxylic acids, unspecified	Water	ocean	mg	7.41828
460	Carboxylic acids, unspecified	Water	river	mg	14.6192
461	Carfentrazone-ethyl	Air	low. pop.	ng	1.6704
462	Carfentrazone-ethyl	Water		pg	7.34685
463	Carfentrazone-ethyl	Water	groundwater	pg	2.63214e-09
464	Carfentrazone-ethyl	Soil	agricultural	ng	43.9969
465	Carfentrazone-ethyl	Soil	forestry	pg	136.147
466	Carnallite	Raw	in water	mg	3.95345
467	Cerium	Raw	in ground	µg	550.932
468	Cerium-141	Air	low. pop.	µBq	3.24459
469	Cerium-141	Water	river	µBq	42.0859
470	Cerium-144	Water	river	µBq	81.3698
471	Cesium-134	Air	low. pop.	nBq	155.395
472	Cesium-134	Water	river	mBq	1.1878
473	Cesium-136	Water	river	µBq	47.4376
474	Cesium-137	Air	low. pop.	µBq	3.91962
475	Cesium-137	Water	ocean	mBq	350.825
476	Cesium-137	Water	river	mBq	20.8615
477	Cesium (I)	Water	ocean	µg	2.00432
478	Cesium (I)	Water	river	µg	3.97262
479	Chloramine	Air	high. pop.	ng	-6.61814
480	Chloramine	Water	river	ng	-59.024
481	Chlorantraniliprole	Air	low. pop.	pg	4.99629
482	Chlorantraniliprole	Water		pg	0.0048369
483	Chlorantraniliprole	Water	groundwater	pg	0.0789094
484	Chlorantraniliprole	Soil	agricultural	pg	32.6043
485	Chlorantraniliprole	Soil	forestry	pg	0.352803
486	Chlorate	Water	river	mg	31.0189
487	Chlorfenvinphos	Soil	agricultural	pg	18.8141
488	Chloridazon	Soil	agricultural	pg	43.5751
489	Chloride	Water		mg	149.279
490	Chloride	Water	groundwater	mg	529.395
491	Chloride	Water	ocean	g	17.7135
492	Chloride	Water	river	g	67.5129
493	Chloride	Soil		µg	42.3217
494	Chloride	Soil	agricultural	mg	9.55656
495	Chloride	Soil	industrial	µg	485.053
496	Chlorides, unspecified	Water		mg	4.00933
497	Chlorimuron-ethyl	Air	low. pop.	ng	-26.5126
498	Chlorimuron-ethyl	Water		pg	43.4068
499	Chlorimuron-ethyl	Water	groundwater	ng	7.65194
500	Chlorimuron-ethyl	Soil	agricultural	ng	209.182
501	Chlorimuron-ethyl	Soil	forestry	ng	1.5811
502	Chlorinated solvents, unspecified	Air	low. pop.	ng	26.7462
503	Chlorinated solvents, unspecified	Water	river	mg	1.07237
504	Chlorine	Air		mg	2.05432
505	Chlorine	Air	high. pop.	mg	4.00954
506	Chlorine	Air	low. pop.	ng	744.912
507	Chlorine	Water		µg	6.00848
508	Chlorine	Water	groundwater	µg	71.3552
509	Chlorine	Water	river	mg	60.2361
510	Chlorine	Soil		µg	71.3552
511	Chlormequat	Soil	agricultural	ng	87.7277
512	Chloroacetic acid	Air	high. pop.	µg	35.753
513	Chloroacetic acid	Water		pg	66.8079
514	Chloroacetic acid	Water	river	µg	125.066
515	Chloroacetyl chloride	Water	river	ng	-5.01381
516	Chloroethylene	Air		ng	228.314
517	Chloroethylene	Air	high. pop.	µg	2.48504
518	Chloroethylene	Water		pg	375.839
519	Chloroethylene	Water	river	µg	8.82042
520	Chloroform	Air		ng	20.7316
521	Chloroform	Air	high. pop.	ng	382.51
522	Chloroform	Air	low. pop.	ng	401.959
523	Chloroform	Water		pg	113.224
524	Chloroform	Water	river	ng	-2.44235
525	Chloropicrin	Soil	agricultural	ng	2.07526
526	Chlorosilane, trimethyl-	Air	high. pop.	ng	2.21337
527	Chlorosulfonic acid	Air		ng	2.42306
528	Chlorosulfonic acid	Air	high. pop.	ng	-12.6831
529	Chlorosulfonic acid	Water	river	ng	-31.6283
530	Chlorothalonil	Soil	agricultural	µg	1.47248
531	Chlorpyrifos	Air	low. pop.	µg	23.1862
532	Chlorpyrifos	Water		ng	34.2834
533	Chlorpyrifos	Water	groundwater	ng	41.8505
534	Chlorpyrifos	Soil	agricultural	µg	216.628
535	Chlorpyrifos	Soil	forestry	ng	668.917
536	Chlorpyrifos methyl	Soil	agricultural	µg	-44.0319
537	Chlorsulfuron	Soil	agricultural	pg	0.673109
538	Chlortoluron	Soil	agricultural	µg	-1.72926
539	Choline chloride	Soil	agricultural	pg	92.7959
540	Chromium	Raw	in ground	mg	10.1487
541	Chromium-51	Air	low. pop.	nBq	207.913
542	Chromium-51	Water	river	mBq	3.85389
543	Chromium (III)	Air		µg	45.5739
544	Chromium (III)	Air	high. pop.	µg	65.3219
545	Chromium (III)	Air	low. pop.	µg	31.0642
546	Chromium (III)	Air	stratosphere + troposphere	pg	0.00134954
547	Chromium (III)	Water		µg	10.6609
548	Chromium (III)	Water	groundwater	µg	3.44908
549	Chromium (III)	Water	ocean	µg	3.65985
550	Chromium (III)	Water	river	µg	18.8421
551	Chromium (III)	Soil		µg	5.06671
552	Chromium (III)	Soil	agricultural	µg	811.709
553	Chromium (III)	Soil	forestry	µg	2.88581
554	Chromium (III)	Soil	industrial	µg	8.1083
555	Chromium (IV)	Air	high. pop.	pg	0.0573294
556	Chromium (VI)	Air		ng	37.9452
557	Chromium (VI)	Air	high. pop.	µg	1.59683
558	Chromium (VI)	Air	low. pop.	µg	1.82563
559	Chromium (VI)	Water		ng	118.023
560	Chromium (VI)	Water	groundwater	µg	18.786
561	Chromium (VI)	Water	river	mg	1.92675
562	Chromium (VI)	Soil		µg	1.40832
563	Chromium, ion	Air		ng	864.973
564	Chromium, ion	Air	high. pop.	µg	2.18167
565	Chromium, ion	Air	low. pop.	µg	22.1937
566	Chromium, ion	Air	stratosphere + troposphere	pg	0.532019
567	Chromium, ion	Water		µg	1.83796
568	Chromium, ion	Water	groundwater	µg	6.5345
569	Chromium, ion	Water	ocean	ng	-414.771
570	Chromium, ion	Water	river	µg	-6.44481
571	Chromium, ion	Soil		ng	406.342
572	Chromium, ion	Soil	agricultural	µg	12.8052
573	Chromium, ion	Soil	forestry	ng	5.22886
574	Chromium, ion	Soil	industrial	ng	531.351
575	Chrysene	Air		pg	210.785
576	Chrysene	Water	river	pg	110.375
577	Chrysotile	Raw	in ground	µg	589.785
578	Cinidon-ethyl	Soil	agricultural	pg	63.4841
579	Cinnabar	Raw	in ground	ng	4.25992
580	Clay, bentonite	Raw	in ground	mg	28.1946
581	Clay, unspecified	Raw	in ground	g	4.43547
582	Clethodim	Air	low. pop.	µg	12.0287
583	Clethodim	Water		ng	17.2825
584	Clethodim	Water	groundwater	pg	4.4726e-08
585	Clethodim	Soil	agricultural	µg	109.011
586	Clethodim	Soil	forestry	ng	333.63
587	Clodinafop-propargyl	Soil	agricultural	pg	13.8801
588	Clomazone	Soil	agricultural	ng	103.599
589	Clopyralid	Soil	agricultural	ng	-23.234
590	Cloquintocet-mexyl	Soil	agricultural	pg	2.40613
591	Cloransulam-methyl	Air	low. pop.	ng	-29.7327
592	Cloransulam-methyl	Soil	agricultural	ng	-18.6464
593	Clothianidin	Soil	agricultural	ng	40.3375
594	Coal, brown	Raw	in ground	g	23.5865
595	Coal, hard	Raw	in ground	g	61.4889
596	Cobalt	Raw	in ground	mg	1.48567
597	Cobalt	Air		ng	102.854
598	Cobalt	Air	high. pop.	ng	770.959
599	Cobalt	Air	low. pop.	ng	637.426
600	Cobalt	Water		ng	71.0205
601	Cobalt	Water	groundwater	ng	463.017
602	Cobalt	Water	ocean	pg	115.599
603	Cobalt	Water	river	ng	792.527
604	Cobalt	Soil		ng	146.149
605	Cobalt	Soil	agricultural	ng	475.84
606	Cobalt	Soil	industrial	ng	231.243
607	Cobalt-57	Water	river	mBq	1.50585
608	Cobalt-58	Air	low. pop.	µBq	2.91392
609	Cobalt-58	Water	river	mBq	195.009
610	Cobalt-60	Air	low. pop.	µBq	14.6715
611	Cobalt-60	Water	river	mBq	74.598
612	Cobalt (II)	Air		µg	11.2217
613	Cobalt (II)	Air	high. pop.	µg	15.2907
614	Cobalt (II)	Air	low. pop.	µg	26.8638
615	Cobalt (II)	Water		ng	36.4398
616	Cobalt (II)	Water	groundwater	µg	10.8158
617	Cobalt (II)	Water	ocean	ng	27.8937
618	Cobalt (II)	Water	river	mg	10.9229
619	Cobalt (II)	Soil		µg	2.36309
620	Cobalt (II)	Soil	agricultural	µg	54.2082
621	Cobalt (II)	Soil	industrial	ng	499.574
622	Cobalt, Co 5.0E-2%, in mixed ore	Raw	in ground	ng	-13.4609
623	COD (Chemical Oxygen Demand)	Water		g	2.66614
624	COD (Chemical Oxygen Demand)	Water	groundwater	µg	543.068
625	COD (Chemical Oxygen Demand)	Water	ocean	mg	215.295
626	COD (Chemical Oxygen Demand)	Water	river	g	4.15064
627	Colemanite	Raw	in ground	mg	54.2464
628	Copper	Raw	in ground	mg	142.928
629	Copper oxychloride	Air	low. pop.	ng	4.87621
630	Copper oxychloride	Water		pg	20.1144
631	Copper oxychloride	Soil	agricultural	ng	11.2923
632	Copper oxychloride	Soil	forestry	pg	56.1406
633	Copper, 0.52% in sulfide, Cu 0.27% and Mo 8.2E-3% in crude ore	Raw	in ground	µg	849.588
634	Copper, 0.59% in sulfide, Cu 0.22% and Mo 8.2E-3% in crude ore	Raw	in ground	µg	471.272
635	Copper, 0.97% in sulfide, Cu 0.36% and Mo 4.1E-2% in crude ore	Raw	in ground	µg	-548.89
636	Copper, 0.99% in sulfide, Cu 0.36% and Mo 8.2E-3% in crude ore	Raw	in ground	mg	1.03209
637	Copper, 1.13% in sulfide, Cu 0.76% and Ni 0.76% in crude ore	Raw	in ground	µg	-8.61868
638	Copper, 1.18% in sulfide, Cu 0.39% and Mo 8.2E-3% in crude ore	Raw	in ground	µg	667.613
639	Copper, 1.42% in sulfide, Cu 0.81% and Mo 8.2E-3% in crude ore	Raw	in ground	µg	112.754
640	Copper, 2.19% in sulfide, Cu 1.83% and Mo 8.2E-3% in crude ore	Raw	in ground	µg	343.244
641	Copper, Cu 0.38%, Au 9.7E-4%, Ag 9.7E-4%, Zn 0.63%, Pb 0.014%, in ore	Raw	in ground	µg	831.603
642	Copper, Cu 3.2E+0%, Pt 2.5E-4%, Pd 7.3E-4%, Rh 2.0E-5%, Ni 2.3E+0% in ore	Raw	in ground	µg	20.2776
643	Copper, Cu 5.2E-2%, Pt 4.8E-4%, Pd 2.0E-4%, Rh 2.4E-5%, Ni 3.7E-2% in ore	Raw	in ground	ng	-489.93
644	Copper, Cu 6.8E-1%, in mixed ore	Raw	in ground	ng	-183.049
645	Copper, ion	Air		mg	1.42678
646	Copper, ion	Air	high. pop.	µg	455.096
647	Copper, ion	Air	low. pop.	µg	714.884
648	Copper, ion	Air	stratosphere + troposphere	pg	17.9281
649	Copper, ion	Water		µg	79.9226
650	Copper, ion	Water	groundwater	µg	40.3167
651	Copper, ion	Water	ocean	µg	6.09775
652	Copper, ion	Water	river	mg	2.95314
653	Copper, ion	Soil		µg	27.8111
654	Copper, ion	Soil	agricultural	mg	-14.4644
655	Copper, ion	Soil	forestry	µg	-3.76002
656	Copper, ion	Soil	industrial	µg	30.4952
657	Cu-HDO	Water		pg	0.221567
658	Cumene	Air		pg	202.056
659	Cumene	Air	high. pop.	µg	7.65409
660	Cumene	Air	low. pop.	ng	22.3359
661	Cumene	Water		µg	116.89
662	Cumene	Water	river	µg	18.3927
663	Cyanide	Air		ng	17.4539
664	Cyanide	Air	high. pop.	mg	1.01468
665	Cyanide	Air	low. pop.	mg	464.131
666	Cyanide	Water		ng	882.114
667	Cyanide	Water	groundwater	pg	5.38947
668	Cyanide	Water	ocean	µg	3.41826
669	Cyanide	Water	river	mg	2.26696
670	Cyanoacetic acid	Air	high. pop.	ng	-10.3869
671	Cyclohexane	Air	high. pop.	ng	2.67487
672	Cyclohexane	Air	low. pop.	pg	206.573
673	Cyclohexane	Water	river	pg	575.367
674	Cycloxydim	Soil	agricultural	pg	12.2063
675	Cyhalothrin, gamma-	Air	low. pop.	ng	-68.3983
676	Cyhalothrin, gamma-	Soil	agricultural	ng	-2.93219
677	Cymoxanil	Soil	agricultural	ng	2.36497
678	Cypermethrin	Air	low. pop.	ng	4.66305
679	Cypermethrin	Water		pg	2.01367
680	Cypermethrin	Water	groundwater	pg	0.353626
681	Cypermethrin	Soil	agricultural	mg	11.2959
682	Cypermethrin	Soil	forestry	pg	386.954
683	Cyproconazole	Air	low. pop.	ng	67.9977
684	Cyproconazole	Water		pg	98.5789
685	Cyproconazole	Water	groundwater	pg	373.818
686	Cyproconazole	Soil	agricultural	ng	58.4992
687	Cyproconazole	Soil	forestry	ng	3.93608
688	Cyprodinil	Soil	agricultural	µg	-3.43065
689	Decanoic acid	Water		pg	28.2477
690	Deltamethrin	Water	groundwater	pg	2.58857e-10
691	Deltamethrin	Soil	agricultural	ng	-13.5876
692	Desmedipham	Soil	agricultural	ng	199.797
693	Diafenthiuron	Soil	agricultural	pg	414.441
694	Diatomite	Raw	in ground	ng	9.37314
695	Diazinon	Soil	agricultural	ng	19.2831
696	Dibenz(a,h)anthracene	Air		pg	-14.5798
697	Dibenz(a,h)anthracene	Water	river	pg	1.99788
698	Dibutyltin	Water	ocean	pg	9.16224e-05
699	Dicamba	Air	low. pop.	ng	-19.0992
700	Dicamba	Water	groundwater	pg	9.76528
701	Dicamba	Water	river	pg	0.0390614
702	Dicamba	Soil	agricultural	ng	38.6007
703	Dichlorprop	Air	low. pop.	pg	1.22814
704	Dichlorprop	Water	groundwater	pg	1.27937
705	Dichlorprop	Water	river	pg	0.00537703
706	Dichlorprop	Soil	agricultural	pg	50.987
707	Dichlorprop-P	Soil	agricultural	µg	1.29282
708	Dichlorvos	Soil	agricultural	pg	168.863
709	Dichromate	Water		ng	42.8091
710	Dichromate	Water	river	ng	607.83
711	Diclofop	Soil	agricultural	µg	-1.78719
712	Diclofop-methyl	Soil	agricultural	µg	-1.79955
713	Dicrotophos	Soil	agricultural	pg	-1.93816e-05
714	Diethanolamine	Water		pg	600.208
715	Diethyl ether	Air	high. pop.	pg	0.107541
716	Diethylamine	Air	high. pop.	µg	18.6075
717	Diethylamine	Water	river	µg	44.6587
718	Diethylene glycol	Air	high. pop.	pg	3.33686
719	Diethylene glycol	Air	low. pop.	pg	775.61
720	Diethylene glycol	Water		pg	46.4428
721	Diethylene glycol	Water	river	pg	47.9759
722	Difenoconazole	Air	low. pop.	ng	9.2365
723	Difenoconazole	Water		pg	35.3764
724	Difenoconazole	Water	groundwater	pg	42.8034
725	Difenoconazole	Soil	agricultural	ng	-207.269
726	Difenoconazole	Soil	forestry	pg	409.292
727	Diflubenzuron	Air	low. pop.	ng	3.06509
728	Diflubenzuron	Water		pg	14.0871
729	Diflubenzuron	Water	groundwater	pg	1.15115
730	Diflubenzuron	Soil	agricultural	µg	-77.7668
731	Diflubenzuron	Soil	forestry	pg	265.263
732	Diflufenican	Soil	agricultural	µg	-1.38564
733	Diflufenzopyr-sodium	Soil	agricultural	ng	3.11425
734	Diisobutyl ketone	Water	river	ng	383.638
735	Dimethachlor	Soil	agricultural	ng	252.683
736	Dimethenamid	Air	low. pop.	pg	2.67282
737	Dimethenamid	Water	groundwater	pg	0.943343
738	Dimethenamid	Water	river	pg	0.0117918
739	Dimethenamid	Soil	agricultural	ng	81.4181
740	Dimethoate	Water	groundwater	pg	4.35433e-10
741	Dimethoate	Soil	agricultural	ng	19.42
742	Dimethomorph	Soil	agricultural	pg	521.026
743	Dimethyl carbonate	Air		ng	494.433
744	Dimethyl ether	Air		ng	14.645
745	Dimethyl hexanediol	Water		pg	23.3746
746	Dimethyl hexynediol	Water		pg	51.1552
747	Dimethyl malonate	Air	high. pop.	ng	-13.0252
748	Dimethylamine	Air		pg	707.563
749	Dimethylamine	Air	high. pop.	ng	33.0364
750	Dimethylamine	Water	river	µg	18.1679
751	Dimethyldichlorosilane	Air		pg	736.737
752	Dimethyldichlorosilane	Water		pg	11.7457
753	Dinitrogen monoxide	Air		mg	8.5886
754	Dinitrogen monoxide	Air	high. pop.	mg	51.0089
755	Dinitrogen monoxide	Air	low. pop.	mg	781.249
756	Dinitrogen monoxide	Air	stratosphere + troposphere	pg	-26.9735
757	Dinitrogen tetroxide	Air		pg	146.392
758	Dioxin, 2,3,7,8 Tetrachlorodibenzo-p-	Air		pg	22.8708
759	Dioxin, 2,3,7,8 Tetrachlorodibenzo-p-	Air	high. pop.	pg	996.301
760	Dioxin, 2,3,7,8 Tetrachlorodibenzo-p-	Air	low. pop.	pg	38.4692
761	Dioxin, 2,3,7,8 Tetrachlorodibenzo-p-	Water		pg	0.000314624
762	Dioxin, 2,3,7,8 Tetrachlorodibenzo-p-	Soil		pg	0.178252
763	Dioxin, 2,3,7,8 Tetrachlorodibenzo-p-	Soil	industrial	pg	3.35432
764	Diphenylether compounds	Water		pg	22.6835
765	Diphenyltin	Water	ocean	pg	0.00580275
766	Dipropylamine	Air	high. pop.	µg	11.8927
767	Dipropylamine	Water	river	µg	28.5427
768	Dipropylthiocarbamic acid S-ethyl ester	Soil	agricultural	ng	206.656
769	Diquat	Soil	agricultural	ng	246.674
770	Diquat dibromide	Air	low. pop.	ng	957.505
771	Diquat dibromide	Water		ng	1.82008
772	Diquat dibromide	Water	groundwater	pg	10.9042
773	Diquat dibromide	Soil	agricultural	µg	7.01184
774	Diquat dibromide	Soil	forestry	ng	40.1331
775	Discarded fish, demersal	Water	ocean	ng	23.3459
776	Discarded fish, pelagic	Water	ocean	ng	58.0253
777	Dithianone	Soil	agricultural	pg	523.739
778	Diuron	Air	low. pop.	ng	26.0709
779	Diuron	Water		pg	13.8022
780	Diuron	Soil	agricultural	µg	3.21305
781	Diuron	Soil	forestry	pg	659.441
782	DOC, Dissolved Organic Carbon	Water		mg	695.67
783	DOC, Dissolved Organic Carbon	Water	groundwater	µg	530.414
784	DOC, Dissolved Organic Carbon	Water	ocean	mg	70.6706
785	DOC, Dissolved Organic Carbon	Water	river	mg	769.74
786	Dodecanoic acid	Air		pg	74.3982
787	Dodecanoic acid	Water		ng	1.29504
788	Dodecanol	Water		pg	72.0161
789	Dolomite	Raw	in ground	g	13.3221
790	Dysprosium	Raw	in ground	µg	1.45769
791	EDTA	Water		ng	12.9406
792	Emamectin benzoate	Water		pg	52.9035
793	Emamectin benzoate	Water	groundwater	pg	1.3436
794	Emamectin benzoate	Soil	agricultural	ng	369.815
795	Emamectin benzoate	Soil	forestry	ng	3.91056
796	Endosulfan	Soil	agricultural	µg	-23.2401
797	Endothall	Soil	agricultural	ng	2.75145
798	Energy, geothermal, converted	Raw	in ground	kJ	3.81343
799	Energy, gross calorific value, in biomass	Raw	biotic	MJ	72.602
800	Energy, gross calorific value, in biomass, primary forest	Raw	biotic	MJ	3.24281
801	Energy, kinetic (in wind), converted	Raw	in air	kJ	272.325
802	Energy, potential (in hydropower reservoir), converted	Raw	in water	kJ	192.606
803	Energy, solar, converted	Raw	in air	kJ	22.4512
804	Epichlorohydrin	Water		ng	-18.0067
805	Epoxiconazole	Air	low. pop.	ng	1.47955
806	Epoxiconazole	Water		pg	3.89745
807	Epoxiconazole	Water	groundwater	pg	8.42329
808	Epoxiconazole	Soil	agricultural	ng	-101.338
809	Epoxiconazole	Soil	forestry	pg	153.008
810	Esfenvalerate	Air	low. pop.	ng	-35.6445
811	Esfenvalerate	Soil	agricultural	ng	1.3087
812	Ethaboxam	Water	groundwater	pg	8.29187e-09
813	Ethaboxam	Soil	agricultural	pg	7.45791e-08
814	Ethalfluralin	Water	groundwater	pg	2.65278e-08
815	Ethalfluralin	Soil	agricultural	ng	84.2423
816	Ethane	Air		µg	2.35036
817	Ethane	Air	high. pop.	µg	664.14
818	Ethane	Air	low. pop.	mg	194.363
819	Ethane, 1,1-difluoro-, HFC-152a	Air	high. pop.	µg	19.7624
820	Ethane, 1,1-difluoro-, HFC-152a	Air	low. pop.	ng	11.8259
821	Ethane, 1,1,1-trichloro-, HCFC-140	Air		pg	14.1046
822	Ethane, 1,1,1-trichloro-, HCFC-140	Air	low. pop.	ng	82.0746
823	Ethane, 1,1,1-trichloro-, HCFC-140	Water	river	pg	9.10119e-05
824	Ethane, 1,1,1-trifluoro-, HFC-143a	Air	low. pop.	pg	0.0127814
825	Ethane, 1,1,1,2-tetrafluoro-, HFC-134a	Air		ng	315.452
826	Ethane, 1,1,1,2-tetrafluoro-, HFC-134a	Air	high. pop.	ng	11.3329
827	Ethane, 1,1,1,2-tetrafluoro-, HFC-134a	Air	low. pop.	µg	1.2431
828	Ethane, 1,1,2-trichloro-1,2,2-trifluoro-, CFC-113	Air		ng	13.0159
829	Ethane, 1,1,2-trichloro-1,2,2-trifluoro-, CFC-113	Air	high. pop.	pg	876.322
830	Ethane, 1,2-dichloro-	Air		µg	62.0812
831	Ethane, 1,2-dichloro-	Air	high. pop.	µg	3.53117
832	Ethane, 1,2-dichloro-	Air	low. pop.	ng	163.689
833	Ethane, 1,2-dichloro-	Water		pg	943.543
834	Ethane, 1,2-dichloro-	Water	river	µg	-3.4024
835	Ethane, 1,2-dichloro-1,1,2,2-tetrafluoro-, CFC-114	Air	low. pop.	ng	-4.03223
836	Ethane, 2-chloro-1,1,1,2-tetrafluoro-, HCFC-124	Air		ng	13.0159
837	Ethane, chloro-	Air		ng	17.0507
838	Ethane, hexafluoro-, HFC-116	Air		ng	110.423
839	Ethane, hexafluoro-, HFC-116	Air	high. pop.	ng	197.115
840	Ethane, pentafluoro-, HFC-125	Air	low. pop.	pg	0.165946
841	Ethanol	Air		pg	-271.455
842	Ethanol	Air	high. pop.	µg	142.238
843	Ethanol	Air	low. pop.	mg	2.50205
844	Ethanol	Water		ng	-1.20196
845	Ethanol	Water	river	µg	296.396
846	Ethanol, 2-ethoxy-	Air	low. pop.	pg	189.986
847	Ethanol, 2-ethoxy-	Water	river	pg	11.7517
848	Ethephon	Air	low. pop.	pg	3.54764e-05
849	Ethephon	Water	groundwater	pg	2.34139e-06
850	Ethephon	Water	river	pg	1.41893e-08
851	Ethephon	Soil	agricultural	µg	-3.06384
852	Ethofumesate	Soil	agricultural	µg	3.58133
853	Ethoprop	Soil	agricultural	ng	47.8802
854	Ethyl acetate	Air	high. pop.	µg	28.7359
855	Ethyl acetate	Water	river	µg	47.6309
856	Ethyl cellulose	Air	high. pop.	ng	18.7538
857	Ethylamine	Air	high. pop.	ng	141.127
858	Ethylamine	Water	river	ng	338.706
859	Ethylene	Air		µg	113.684
860	Ethylene	Air	high. pop.	mg	1.82145
861	Ethylene	Air	low. pop.	mg	268.19
862	Ethylene	Water	river	µg	45.2391
863	Ethylene diamine	Air	high. pop.	ng	11.2609
864	Ethylene diamine	Water	river	ng	27.0942
865	Ethylene oxide	Air		ng	35.0854
866	Ethylene oxide	Air	high. pop.	µg	19.4933
867	Ethylene oxide	Air	low. pop.	pg	-44.3886
868	Ethylene oxide	Air	stratosphere + troposphere	pg	-164.275
869	Ethylene oxide	Water		pg	5.47456
870	Ethylene oxide	Water	groundwater	ng	86.5945
871	Ethylene oxide	Water	river	µg	44.1844
872	Ethyne	Air		µg	10.4541
873	Ethyne	Air	high. pop.	µg	208.261
874	Ethyne	Air	low. pop.	mg	5.46032
875	Europium	Raw	in ground	µg	2.66299
876	Feldspar	Raw	in ground	ng	378.303
877	Fenamiphos	Soil	agricultural	pg	246.619
878	Fenbuconazole	Soil	agricultural	pg	138.748
879	Fenoxaprop	Air	low. pop.	ng	-46.6559
880	Fenoxaprop	Soil	agricultural	ng	-36.6754
881	Fenoxaprop-P ethyl ester	Soil	agricultural	ng	-16.3776
882	Fenoxaprop ethyl ester	Soil	agricultural	ng	-148.93
883	Fenpiclonil	Soil	agricultural	ng	32.1795
884	Fenpropidin	Soil	agricultural	µg	-3.25706
885	Fenpropimorph	Soil	agricultural	ng	-241.281
886	Fentin hydroxide	Soil	agricultural	ng	8.28497
887	Fipronil	Air	low. pop.	ng	82.7669
888	Fipronil	Water		pg	133.297
889	Fipronil	Water	groundwater	ng	1.43736
890	Fipronil	Soil	agricultural	µg	4.85578
891	Fipronil	Soil	forestry	ng	4.48445
892	Fish, demersal, in ocean	Raw	biotic	ng	243.952
893	Fish, pelagic, in ocean	Raw	biotic	ng	845.989
894	Florasulam	Soil	agricultural	ng	-30.51
895	Fluazifop	Soil	agricultural	pg	11.3753
896	Fluazifop-p-butyl	Air	low. pop.	ng	-66.9482
897	Fluazifop-P-butyl	Soil	agricultural	ng	47.8319
898	Fluazinam	Air	low. pop.	ng	74.3714
899	Fluazinam	Water		pg	418.339
900	Fluazinam	Water	groundwater	ng	2.92665
901	Fluazinam	Soil	agricultural	ng	65.9358
902	Fluazinam	Soil	forestry	ng	2.80614
903	Flucarbazone sodium salt	Soil	agricultural	pg	0.0420688
904	Fludioxonil	Air	low. pop.	pg	294.042
905	Fludioxonil	Water		pg	0.415455
906	Fludioxonil	Water	groundwater	pg	0.00631039
907	Fludioxonil	Soil	agricultural	ng	-68.8529
908	Fludioxonil	Soil	forestry	pg	20.2344
909	Flufenacet	Air	low. pop.	ng	-25.1019
910	Flufenacet	Soil	agricultural	µg	-1.22147
911	Flumetsulam	Air	low. pop.	ng	-5.87307
912	Flumetsulam	Soil	agricultural	ng	5.19836
913	Flumiclorac-pentyl	Air	low. pop.	ng	-10.0495
914	Flumiclorac-pentyl	Soil	agricultural	pg	-430.595
915	Flumioxazin	Air	low. pop.	ng	-91.6073
916	Flumioxazin	Water		pg	11.5754
917	Flumioxazin	Water	groundwater	pg	218.9
918	Flumioxazin	Soil	agricultural	ng	248.123
919	Flumioxazin	Soil	forestry	pg	530.456
920	Fluoranthene	Air		ng	1.66781
921	Fluoranthene	Water	river	ng	898.404
922	Fluorene	Air		ng	11.0261
923	Fluorene	Water	river	ng	331.126
924	Fluoride	Water		mg	1.22968
925	Fluoride	Water	groundwater	µg	246.472
926	Fluoride	Water	ocean	mg	4.96301
927	Fluoride	Water	river	mg	546.705
928	Fluoride	Soil		µg	1.97048
929	Fluoride	Soil	industrial	µg	8.08839
930	Fluorine	Raw	in ground	mg	105.71
931	Fluorine	Air		µg	8.57994
932	Fluorine	Air	high. pop.	µg	760.478
933	Fluorine	Air	low. pop.	µg	4.70376
934	Fluorine	Water	river	µg	65.6992
935	Fluorine, 4.5% in apatite, 3% in crude ore	Raw	in ground	µg	-891.527
936	Fluorspar	Raw	in ground	mg	101.125
937	Fluosilicic acid	Air	high. pop.	ng	717.023
938	Fluosilicic acid	Water		µg	-8.87121
939	Fluosilicic acid	Water	river	µg	1.29064
940	Flupyrsulfuron-methyl	Soil	agricultural	pg	0.0653111
941	Fluquinconazole	Soil	agricultural	pg	119.031
942	Flurochloridone	Soil	agricultural	pg	0.517265
943	Fluroxypyr	Soil	agricultural	ng	-51.116
944	Flurtamone	Soil	agricultural	µg	-1.26966
945	Flusilazole	Soil	agricultural	ng	-138.394
946	Flutolanil	Soil	agricultural	ng	9.42095
947	Fluxapyroxad	Water		pg	0.000183518
948	Fluxapyroxad	Water	groundwater	pg	0.133177
949	Fluxapyroxad	Soil	agricultural	pg	0.755857
950	Fluxapyroxad	Soil	forestry	pg	0.0229099
951	Folpet	Soil	agricultural	pg	3.92642
952	Fomesafen	Air	low. pop.	ng	-377.955
953	Fomesafen	Soil	agricultural	ng	-149.045
954	Foramsulfuron	Soil	agricultural	pg	583.93
955	Formaldehyde	Air		µg	761.054
956	Formaldehyde	Air	high. pop.	mg	2.42387
957	Formaldehyde	Air	low. pop.	mg	198.501
958	Formaldehyde	Air	stratosphere + troposphere	pg	-141.612
959	Formaldehyde	Water		µg	12.567
960	Formaldehyde	Water	river	µg	154.524
961	Formamide	Air	high. pop.	ng	-2.14026
962	Formamide	Water	river	ng	-5.13662
963	Formate	Water	river	µg	-1.97847
964	Formic acid	Air	high. pop.	ng	12.4824
965	Formic acid	Air	low. pop.	mg	150.156
966	Formic acid	Water	river	ng	-1.49115
967	Fosetyl	Soil	agricultural	pg	18.9429
968	Fosetyl-aluminium	Soil	agricultural	pg	855.001
969	Fungicides, unspecified	Water	ocean	ng	180.141
970	Fungicides, unspecified	Soil	agricultural	ng	28.6466
971	Furan	Air		pg	0.0327819
972	Furan	Air	low. pop.	mg	655.225
973	Furathiocarb	Soil	agricultural	pg	40.2799
974	Furfural	Air		pg	6.91908
975	Gadolinium	Raw	in ground	µg	7.1825
976	Gallium	Raw	in ground	µg	34.363
977	Gangue	Raw	in ground	g	199.743
978	Gangue, bauxite	Raw	in ground	mg	229.025
979	Gas, mine, off-gas, process, coal mining/m3	Raw	in ground	cm3	491.436
980	Gas, natural/m3	Raw	in ground	l	225.407
981	Gibberellic acid	Air	low. pop.	pg	1.45324
982	Gibberellic acid	Water		pg	0.00599902
983	Gibberellic acid	Soil	agricultural	pg	10.1053
984	Gibberellic acid	Soil	forestry	pg	0.016778
985	Glucose	Water		pg	196.975
986	Glufosinate	Soil	agricultural	µg	1.02221
987	Glutaraldehyde	Water	ocean	ng	107.413
988	Glyphosate	Air	low. pop.	µg	-64.7097
989	Glyphosate	Water		ng	31.9475
990	Glyphosate	Water	groundwater	ng	-40.0847
991	Glyphosate	Water	river	pg	-308.047
992	Glyphosate	Soil	agricultural	mg	158.887
993	Glyphosate	Soil	forestry	ng	538.113
994	Glyphosate	Soil	industrial	ng	300.275
995	Gold	Raw	in ground	µg	3.54935
996	Gold, Au 1.0E-7%, in mixed ore	Raw	in ground	pg	-2.77684
997	Gold, Au 1.1E-4%, Ag 4.2E-3%, in ore	Raw	in ground	ng	-17.2904
998	Gold, Au 1.3E-4%, Ag 4.6E-5%, in ore	Raw	in ground	ng	5.79856
999	Gold, Au 2.1E-4%, Ag 2.1E-4%, in ore	Raw	in ground	ng	1.25483
1000	Gold, Au 4.3E-4%, in ore	Raw	in ground	ng	3.37937
1001	Gold, Au 4.9E-5%, in ore	Raw	in ground	ng	16.9499
1002	Gold, Au 5.4E-4%, Ag 1.5E-5%, in ore	Raw	in ground	pg	95.3767
1003	Gold, Au 6.7E-4%, in ore	Raw	in ground	ng	18.0797
1004	Gold, Au 6.8E-4%, Ag 1.5E-4%, in ore	Raw	in ground	pg	129.608
1005	Gold, Au 7.1E-4%, in ore	Raw	in ground	ng	8.37094
1006	Gold, Au 9.7E-4%, Ag 9.7E-4%, Zn 0.63%, Cu 0.38%, Pb 0.014%, in ore	Raw	in ground	ng	20.2622
1007	Gold, Au 9.7E-5%, Ag 7.6E-5%, in ore	Raw	in ground	pg	468.884
1008	Granite	Raw	in ground	mg	96.2432
1009	Graphite	Raw	in ground	µg	244.575
1010	Gravel	Raw	in ground	g	5.18842
1011	Gypsum	Raw	in ground	mg	493.374
1012	Hafnium	Raw	in ground	µg	92.8805
1013	Halosulfuron-methyl	Soil	agricultural	pg	2.46425
1014	Haloxyfop- (R) Methylester	Soil	agricultural	ng	1.43877
1015	Haloxyfop-ethoxyethyl	Air	low. pop.	ng	11.5391
1016	Haloxyfop-ethoxyethyl	Water		pg	15.2444
1017	Haloxyfop-ethoxyethyl	Water	groundwater	pg	52.1237
1018	Heat, waste	Air		kJ	54.3925
1019	Heat, waste	Air	high. pop.	kJ	273.141
1020	Heat, waste	Air	low. pop.	kJ	14.1756
1021	Heat, waste	Water		kJ	11.487
1022	Heat, waste	Water	river	kJ	45.4825
1023	Heat, waste	Soil	agricultural	kJ	69.7111
1024	Heat, waste	Soil	industrial	kJ	5.91405
1025	Helium	Air		µg	24.7307
1026	Helium	Air	low. pop.	mg	2.57707
1027	Heptane	Air		µg	17.7427
1028	Heptane	Air	high. pop.	mg	3.78761
1029	Herbicides, unspecified	Soil	agricultural	ng	-140.553
1030	Hexaconazole	Soil	agricultural	pg	496.047
1031	Hexane	Air		ng	269.011
1032	Hexane	Air	high. pop.	g	2.64481
1033	Hexane	Air	low. pop.	µg	604.15
1034	Hexazinone	Soil	agricultural	pg	41.3313
1035	Holmium	Raw	in ground	µg	-11.348
1036	Hydramethylnon	Soil	agricultural	pg	0.952537
1037	Hydrazine	Water		pg	3.58361
1038	Hydrocarbons, aliphatic, alkanes, cyclic	Air	high. pop.	mg	19.3192
1039	Hydrocarbons, aliphatic, alkanes, cyclic	Air	low. pop.	µg	2.37324
1040	Hydrocarbons, aliphatic, alkanes, unspecified	Air		µg	198.48
1041	Hydrocarbons, aliphatic, alkanes, unspecified	Air	high. pop.	mg	13.7154
1042	Hydrocarbons, aliphatic, alkanes, unspecified	Air	low. pop.	µg	147.17
1043	Hydrocarbons, aliphatic, alkanes, unspecified	Water	ocean	µg	260.562
1044	Hydrocarbons, aliphatic, alkanes, unspecified	Water	river	µg	516.44
1045	Hydrocarbons, aliphatic, unsaturated	Air		µg	126.357
1046	Hydrocarbons, aliphatic, unsaturated	Air	high. pop.	mg	43.3835
1047	Hydrocarbons, aliphatic, unsaturated	Air	low. pop.	µg	128.72
1048	Hydrocarbons, aliphatic, unsaturated	Water		pg	0.000330518
1049	Hydrocarbons, aliphatic, unsaturated	Water	ocean	µg	24.0519
1050	Hydrocarbons, aliphatic, unsaturated	Water	river	µg	57.4282
1051	Hydrocarbons, aromatic	Air		µg	111.871
1052	Hydrocarbons, aromatic	Air	high. pop.	mg	6.42798
1053	Hydrocarbons, aromatic	Air	low. pop.	µg	6.11781
1054	Hydrocarbons, aromatic	Water	ocean	mg	1.04347
1055	Hydrocarbons, aromatic	Water	river	mg	2.06617
1056	Hydrocarbons, chlorinated	Air		ng	178.811
1057	Hydrocarbons, chlorinated	Air	high. pop.	µg	917.022
1058	Hydrocarbons, chlorinated	Air	low. pop.	ng	830.981
1059	Hydrocarbons, unspecified	Air	low. pop.	µg	-87.6233
1060	Hydrocarbons, unspecified	Water		µg	56.9611
1061	Hydrocarbons, unspecified	Water	ocean	µg	498.566
1062	Hydrocarbons, unspecified	Water	river	mg	5.53991
1063	Hydrocarbons, unspecified	Soil		µg	4.112
1064	Hydrochloric acid	Air		mg	1.93263
1065	Hydrochloric acid	Air	high. pop.	mg	23.8931
1066	Hydrochloric acid	Air	low. pop.	mg	16.3057
1067	Hydrochloric acid	Air	stratosphere + troposphere	pg	-0.773248
1068	Hydrochloric acid	Water		µg	391.204
1069	Hydrogen	Air		mg	2.42178
1070	Hydrogen	Air	high. pop.	mg	15.7973
1071	Hydrogen	Water	river	mg	215.676
1072	Hydrogen-3, Tritium	Air	low. pop.	Bq	12.0986
1073	Hydrogen-3, Tritium	Water	ocean	Bq	728.888
1074	Hydrogen-3, Tritium	Water	river	Bq	590.044
1075	Hydrogen fluoride	Air		µg	71.4384
1076	Hydrogen fluoride	Air	high. pop.	µg	749.117
1077	Hydrogen fluoride	Air	low. pop.	mg	2.23734
1078	Hydrogen peroxide	Air	high. pop.	ng	6.53272
1079	Hydrogen peroxide	Water		pg	12.7496
1080	Hydrogen peroxide	Water	river	µg	20.311
1081	Hydrogen sulfide	Air		µg	321.242
1082	Hydrogen sulfide	Air	high. pop.	mg	1.26114
1083	Hydrogen sulfide	Air	low. pop.	mg	1.96021
1084	Hydrogen sulfide	Water	groundwater	mg	14.3307
1085	Hydrogen sulfide	Water	river	µg	2.98644
1086	Hydroxide	Water		µg	1.01704
1087	Hydroxide	Water	river	ng	-270.931
1088	Hypochlorite	Water		pg	7.86979
1089	Hypochlorite	Water	ocean	µg	21.0612
1090	Hypochlorite	Water	river	µg	21.7598
1091	Imazamox	Air	low. pop.	ng	-15.0331
1092	Imazamox	Water	groundwater	pg	7.81673e-08
1093	Imazamox	Soil	agricultural	ng	30.6364
1094	Imazapyr	Soil	agricultural	pg	77.8579
1095	Imazaquin	Air	low. pop.	ng	-47.9272
1096	Imazaquin	Soil	agricultural	ng	-2.05388
1097	Imazethapyr	Air	low. pop.	ng	-95.5715
1098	Imazethapyr	Water		pg	85.708
1099	Imazethapyr	Water	groundwater	pg	2.38799e-08
1100	Imazethapyr	Soil	agricultural	ng	104.516
1101	Imazethapyr	Soil	forestry	pg	692.931
1102	Imidacloprid	Air	low. pop.	ng	253.273
1103	Imidacloprid	Water		pg	423.907
1104	Imidacloprid	Water	groundwater	ng	15.0211
1105	Imidacloprid	Soil	agricultural	µg	0.706853
1106	Imidacloprid	Soil	forestry	ng	13.7814
1107	Indeno(1,2,3-cd)pyrene	Air		pg	3.02558
1108	Indeno(1,2,3-cd)pyrene	Water	river	pg	31.3586
1109	Indium	Raw	in ground	ng	-76.2852
1110	Indoxacarb	Air	low. pop.	pg	206.583
1111	Indoxacarb	Soil	agricultural	ng	5.58981
1112	Indoxacarb	Soil	forestry	pg	4.48347
1113	Insecticides, unspecified	Soil	agricultural	pg	32.3909
1114	Iodide	Water	groundwater	µg	1.79147
1115	Iodide	Water	ocean	mg	2.33284
1116	Iodide	Water	river	mg	5.48893
1117	Iodide	Soil	industrial	pg	159.886
1118	Iodine	Raw	in water	mg	9.1923
1119	Iodine	Air		ng	846.38
1120	Iodine	Air	high. pop.	µg	7.76082
1121	Iodine	Air	low. pop.	µg	93.5432
1122	Iodine-129	Air	low. pop.	mBq	1.88487
1123	Iodine-131	Air	low. pop.	mBq	25.8105
1124	Iodine-131	Water	river	mBq	9.48185
1125	Iodine-133	Air	low. pop.	µBq	307.247
1126	Iodine-133	Water	river	µBq	88.4293
1127	Iodosulfuron	Soil	agricultural	pg	7.93542
1128	Iodosulfuron-methyl-sodium	Soil	agricultural	pg	0.0407541
1129	Ioxynil	Soil	agricultural	ng	-429.644
1130	Iprodione	Soil	agricultural	ng	152.45
1131	Iron	Raw	in ground	mg	722.151
1132	Iron-59	Water	river	mBq	37.5106
1133	Iron, ion	Air		mg	5.10325
1134	Iron, ion	Air	high. pop.	mg	1.7344
1135	Iron, ion	Air	low. pop.	µg	10.1052
1136	Iron, ion	Water		µg	718.974
1137	Iron, ion	Water	groundwater	mg	38.9524
1138	Iron, ion	Water	ocean	µg	477.724
1139	Iron, ion	Water	river	mg	476.575
1140	Iron, ion	Soil		mg	9.94797
1141	Iron, ion	Soil	agricultural	mg	130.262
1142	Iron, ion	Soil	industrial	µg	689.877
1143	Isocyanic acid	Air	high. pop.	ng	643.896
1144	Isoprene	Air		pg	0.437926
1145	Isoprene	Air	low. pop.	mg	2.18408
1146	Isopropylamine	Air	high. pop.	ng	173.04
1147	Isopropylamine	Water	river	ng	415.287
1148	Isoproturon	Soil	agricultural	µg	-7.50122
1149	Isoxaflutole	Soil	agricultural	ng	93.9587
1150	Kaolin	Soil	agricultural	pg	88.018
1151	Kaolinite	Raw	in ground	mg	3.04629
1152	Kieserite	Raw	in ground	µg	3.84232
1153	Kresoxim-methyl	Soil	agricultural	ng	123.782
1154	Krypton	Raw	in air	ng	4.82151
1155	Krypton-85	Air	low. pop.	mBq	321.996
1156	Krypton-85m	Air	low. pop.	Bq	1.77567
1157	Krypton-87	Air	low. pop.	mBq	45.2698
1158	Krypton-88	Air	low. pop.	mBq	58.8539
1159	Krypton-89	Air	low. pop.	mBq	24.2975
1160	Lactic acid	Air	high. pop.	µg	9.31604
1161	Lactic acid	Water	river	µg	22.3587
1162	Lactofen	Air	low. pop.	ng	-48.2655
1163	Lactofen	Soil	agricultural	ng	-2.06838
1164	Lambda-cyhalothrin	Air	low. pop.	ng	53.9572
1165	Lambda-cyhalothrin	Water		pg	79.1226
1166	Lambda-cyhalothrin	Water	groundwater	pg	0.981362
1167	Lambda-cyhalothrin	Water	river	pg	1.422e-12
1168	Lambda-cyhalothrin	Soil	agricultural	ng	-16.7282
1169	Lambda-cyhalothrin	Soil	forestry	ng	3.36411
1170	Lanthanum	Raw	in ground	µg	365.62
1171	Lanthanum-140	Air	low. pop.	µBq	1.14388
1172	Lanthanum-140	Water	river	µBq	116.298
1173	Laterite	Raw	in ground	mg	4.94266
1174	Lead	Raw	in ground	mg	358.265
1175	Lead-210	Air		µBq	324.817
1176	Lead-210	Air	high. pop.	mBq	18.2743
1177	Lead-210	Air	low. pop.	mBq	50.245
1178	Lead-210	Water		µBq	913.9
1179	Lead-210	Water	groundwater	µBq	751.719
1180	Lead-210	Water	ocean	Bq	1.92133
1181	Lead-210	Water	river	Bq	3.73383
1182	Lead (II)	Air		µg	345.294
1183	Lead (II)	Air	high. pop.	µg	411.09
1184	Lead (II)	Air	low. pop.	µg	281.88
1185	Lead (II)	Air	stratosphere + troposphere	pg	231.175
1186	Lead (II)	Water		µg	11.8918
1187	Lead (II)	Water	groundwater	µg	27.1047
1188	Lead (II)	Water	ocean	µg	3.50434
1189	Lead (II)	Water	river	µg	533.461
1190	Lead (II)	Soil		µg	25.6166
1191	Lead (II)	Soil	agricultural	µg	499.785
1192	Lead (II)	Soil	forestry	ng	215.454
1193	Lead (II)	Soil	industrial	µg	25.8418
1194	Lead, Pb 0.014%, Au 9.7E-4%, Ag 9.7E-4%, Zn 0.63%, Cu 0.38%, in ore	Raw	in ground	µg	100.508
1195	Lenacil	Soil	agricultural	ng	108.541
1196	Linuron	Soil	agricultural	µg	-9.61478
1197	Lithium	Raw	in ground	ng	-336.124
1198	Lithium	Air	high. pop.	pg	5.71894
1199	Lithium	Water		mg	3.39418
1200	Lithium	Water	groundwater	ng	1.94192
1201	Lithium	Water	river	ng	-593.385
1202	Lithium	Soil		ng	1.94192
1203	Lithium (I)	Air	high. pop.	pg	1.37488
1204	Lithium (I)	Water		ng	588.619
1205	Lithium (I)	Water	groundwater	ng	176.872
1206	Lithium (I)	Water	ocean	µg	530.599
1207	Lithium (I)	Water	river	mg	1.04094
1208	Lithium (I)	Soil		ng	176.872
1209	Lufenuron	Soil	agricultural	ng	11.8973
1210	Lufenuron	Soil	forestry	pg	168.379
1211	m-Xylene	Air		µg	62.8232
1212	m-Xylene	Air	high. pop.	mg	1.66984
1213	m-Xylene	Air	low. pop.	ng	1.60132
1214	m-Xylene	Water		ng	95.6708
1215	m-Xylene	Water	river	ng	-2.24787
1216	Magnesite	Raw	in ground	g	27.2464
1217	Magnesium	Raw	in ground	mg	170.535
1218	Magnesium	Air		µg	14.6891
1219	Magnesium	Air	high. pop.	mg	6.57881
1220	Magnesium	Air	low. pop.	mg	1.60859
1221	Magnesium	Water		mg	1.98111
1222	Magnesium	Water	groundwater	mg	11.6339
1223	Magnesium	Water	ocean	g	1.0541
1224	Magnesium	Water	river	mg	749.151
1225	Magnesium	Soil		µg	155.773
1226	Magnesium	Soil	agricultural	mg	96.3635
1227	Magnesium	Soil	industrial	µg	161.537
1228	Malathion	Soil	agricultural	ng	910.864
1229	Maleic anhydride	Water		pg	46.5022
1230	Maleic hydrazide	Soil	agricultural	ng	52.3702
1231	Mancozeb	Air	low. pop.	µg	1.4512
1232	Mancozeb	Water		ng	2.5442
1233	Mancozeb	Water	groundwater	ng	8.45464
1234	Mancozeb	Soil	agricultural	µg	3.81512
1235	Mancozeb	Soil	forestry	ng	56.3824
1236	Mandipropamid	Soil	agricultural	pg	113.086
1237	Maneb	Soil	agricultural	ng	1.21918
1238	Manganese	Raw	in ground	mg	11.5764
1239	Manganese-54	Air	low. pop.	nBq	106.474
1240	Manganese-54	Water	river	mBq	2.84923
1241	Manganese (II)	Air		µg	80.8878
1242	Manganese (II)	Air	high. pop.	mg	2.47297
1243	Manganese (II)	Air	low. pop.	µg	41.3699
1244	Manganese (II)	Water		µg	12.3591
1245	Manganese (II)	Water	groundwater	µg	628.078
1246	Manganese (II)	Water	ocean	µg	151.715
1247	Manganese (II)	Water	river	mg	2.34642
1248	Manganese (II)	Soil		µg	15.2799
1249	Manganese (II)	Soil	agricultural	mg	59.8586
1250	Manganese (II)	Soil	industrial	µg	15.768
1251	MCPB	Air	low. pop.	pg	1.68659
1252	MCPB	Water	groundwater	pg	0.0179665
1253	MCPB	Water	river	pg	3.88621
1254	MCPB	Soil	agricultural	µg	163.452
1255	Mecoprop	Soil	agricultural	pg	38.4289
1256	Mecoprop-P	Soil	agricultural	ng	1.79878
1257	Mefenpyr	Soil	agricultural	ng	-297.841
1258	Mefenpyr-diethyl	Soil	agricultural	ng	-166.735
1259	Mepiquat chloride	Soil	agricultural	µg	-1.17571
1260	Mercury	Raw	in ground	µg	5.64742
1261	Mercury (II)	Air		µg	1.25217
1262	Mercury (II)	Air	high. pop.	µg	7.95032
1263	Mercury (II)	Air	low. pop.	µg	5.34186
1264	Mercury (II)	Air	stratosphere + troposphere	pg	0.000744722
1265	Mercury (II)	Water		ng	29.0822
1266	Mercury (II)	Water	groundwater	ng	72.1984
1267	Mercury (II)	Water	ocean	ng	126.471
1268	Mercury (II)	Water	river	µg	23.0991
1269	Mercury (II)	Soil		ng	7.11082
1270	Mercury (II)	Soil	agricultural	ng	580.678
1271	Mercury (II)	Soil	industrial	ng	43.632
1272	Mesosulfuron-methyl (prop)	Soil	agricultural	pg	0.224812
1273	Mesotrione	Air	low. pop.	pg	5.30487
1274	Mesotrione	Water		pg	0.00458562
1275	Mesotrione	Soil	agricultural	ng	186.248
1276	Mesotrione	Soil	forestry	pg	0.180204
1277	Metalaxil	Soil	agricultural	ng	313.175
1278	Metalaxyl-M	Air	low. pop.	pg	117.723
1279	Metalaxyl-M	Water		pg	0.167539
1280	Metalaxyl-M	Water	groundwater	pg	5.19649
1281	Metalaxyl-M	Soil	agricultural	ng	11.9279
1282	Metalaxyl-M	Soil	forestry	pg	8.25082
1283	Metaldehyde (tetramer)	Soil	agricultural	µg	-3.5715
1284	Metam-sodium dihydrate	Soil	agricultural	µg	8.81653
1285	Metamitron	Soil	agricultural	µg	5.6327
1286	Metazachlor	Soil	agricultural	ng	596.45
1287	Metconazole	Soil	agricultural	ng	24.6045
1288	Methane	Air	high. pop.	ng	-138.291
1289	Methane, biogenic	Air		mg	42.4482
1290	Methane, biogenic	Air	high. pop.	mg	19.9981
1291	Methane, biogenic	Air	low. pop.	mg	322.843
1292	Methane, bromo-, Halon 1001	Air		ng	23.429
1293	Methane, bromo-, Halon 1001	Air	high. pop.	pg	20.9619
1294	Methane, bromochlorodifluoro-, Halon 1211	Air	low. pop.	ng	427.681
1295	Methane, bromotrifluoro-, Halon 1301	Air	high. pop.	pg	0.445788
1296	Methane, bromotrifluoro-, Halon 1301	Air	low. pop.	µg	1.15444
1297	Methane, chlorodifluoro-, HCFC-22	Air		pg	0.0025001
1298	Methane, chlorodifluoro-, HCFC-22	Air	high. pop.	ng	95.0141
1299	Methane, chlorodifluoro-, HCFC-22	Air	low. pop.	µg	3.74464
1300	Methane, dichloro-, HCC-30	Air		ng	-268.171
1301	Methane, dichloro-, HCC-30	Air	high. pop.	ng	37.019
1302	Methane, dichloro-, HCC-30	Air	low. pop.	µg	1.18905
1303	Methane, dichloro-, HCC-30	Water	river	µg	1.2033
1304	Methane, dichlorodifluoro-, CFC-12	Air		pg	0.410399
1305	Methane, dichlorodifluoro-, CFC-12	Air	high. pop.	ng	54.4732
1306	Methane, dichlorodifluoro-, CFC-12	Air	low. pop.	pg	163.351
1307	Methane, dichlorofluoro-, HCFC-21	Air	high. pop.	pg	241.023
1308	Methane, fossil	Air		mg	14.4881
1309	Methane, fossil	Air	high. pop.	g	1.90019
1310	Methane, fossil	Air	low. pop.	g	2.17549
1311	Methane, fossil	Air	stratosphere + troposphere	pg	-44.9558
1312	Methane, land transformation	Air	low. pop.	mg	928.235
1313	Methane, monochloro-, R-40	Air		ng	1.26942
1314	Methane, monochloro-, R-40	Air	low. pop.	µg	2.17374
1315	Methane, tetrachloro-, CFC-10	Air		ng	11.029
1316	Methane, tetrachloro-, CFC-10	Air	high. pop.	µg	33.0351
1317	Methane, tetrachloro-, CFC-10	Water		pg	69.3749
1318	Methane, tetrafluoro-, CFC-14	Air		µg	1.92497
1319	Methane, tetrafluoro-, CFC-14	Air	high. pop.	ng	285.443
1320	Methane, trichlorofluoro-, CFC-11	Air	high. pop.	pg	265.87
1321	Methane, trifluoro-, HFC-23	Air	high. pop.	ng	76.6892
1322	Methane, trifluoro-, HFC-23	Air	low. pop.	µg	14.1425
1323	Methanesulfonic acid	Air	high. pop.	ng	-10.4963
1324	Methanol	Air		µg	189.975
1325	Methanol	Air	high. pop.	µg	141.233
1326	Methanol	Air	low. pop.	mg	273.086
1327	Methanol	Water		µg	5.72817
1328	Methanol	Water	ocean	ng	714.588
1329	Methanol	Water	river	mg	1.21274
1330	Methiocarb	Soil	agricultural	pg	9.58648
1331	Methomyl	Air	low. pop.	ng	111.977
1332	Methomyl	Water		pg	94.6804
1333	Methomyl	Water	groundwater	ng	7.00803
1334	Methomyl	Water	river	pg	2.09867e-08
1335	Methomyl	Soil	agricultural	ng	585.241
1336	Methomyl	Soil	forestry	ng	6.60991
1337	Methoxyfenozide	Air	low. pop.	ng	3.07354
1338	Methoxyfenozide	Water		pg	5.53968
1339	Methoxyfenozide	Water	groundwater	pg	34.7799
1340	Methoxyfenozide	Soil	agricultural	ng	13.6672
1341	Methoxyfenozide	Soil	forestry	pg	154.051
1342	Methyl acetate	Air		ng	12.5461
1343	Methyl acetate	Air	high. pop.	ng	-1.01759
1344	Methyl acetate	Water	river	ng	-2.44222
1345	Methyl acrylate	Air	high. pop.	ng	20.9498
1346	Methyl acrylate	Water	river	ng	409.26
1347	Methyl borate	Air	high. pop.	ng	12.3881
1348	Methyl ethyl ketone	Air		pg	0.602651
1349	Methyl ethyl ketone	Air	high. pop.	µg	8.76215
1350	Methyl ethyl ketone	Air	low. pop.	ng	1.24971
1351	Methyl ethyl ketone	Water	river	pg	0.089225
1352	Methyl formate	Air		pg	97.6621
1353	Methyl formate	Air	high. pop.	ng	-16.103
1354	Methyl formate	Water	river	ng	-6.42901
1355	Methyl lactate	Air	high. pop.	µg	10.2275
1356	Methylamine	Air		pg	60.9144
1357	Methylamine	Air	high. pop.	µg	6.79297
1358	Methylamine	Water	river	µg	16.3024
1359	Methylpentane	Water	river	pg	23.5592
1360	Metiram	Soil	agricultural	ng	30.3212
1361	Metolachlor	Air	low. pop.	ng	-790.549
1362	Metolachlor	Water		pg	0.0112538
1363	Metolachlor	Water	groundwater	pg	-274.854
1364	Metolachlor	Water	river	pg	-3.69917
1365	Metolachlor	Soil	agricultural	µg	189.919
1366	Metolachlor	Soil	forestry	pg	0.26666
1367	Metosulam	Soil	agricultural	pg	0.128771
1368	Metribuzin	Air	low. pop.	ng	-313.037
1369	Metribuzin	Water	groundwater	pg	3.48512e-08
1370	Metribuzin	Soil	agricultural	µg	-1.49887
1371	Metsulfuron-methyl	Air	low. pop.	pg	838.293
1372	Metsulfuron-methyl	Water		pg	1.58344
1373	Metsulfuron-methyl	Water	groundwater	pg	130.401
1374	Metsulfuron-methyl	Soil	agricultural	ng	-91.4826
1375	Metsulfuron-methyl	Soil	forestry	pg	44.709
1376	Mineral oil	Soil	agricultural	µg	6.2935
1377	Molinate	Soil	agricultural	pg	738.448
1378	Molybdenum	Raw	in ground	mg	1.14684
1379	Molybdenum-99	Water	river	µBq	13.7467
1380	Molybdenum (VI)	Air		µg	239.149
1381	Molybdenum (VI)	Air	high. pop.	µg	3.6866
1382	Molybdenum (VI)	Air	low. pop.	µg	1.03536
1383	Molybdenum (VI)	Water		ng	433.733
1384	Molybdenum (VI)	Water	groundwater	µg	88.2476
1385	Molybdenum (VI)	Water	ocean	ng	24.8283
1386	Molybdenum (VI)	Water	river	µg	128.655
1387	Molybdenum (VI)	Soil		ng	608.802
1388	Molybdenum (VI)	Soil	agricultural	µg	12.0129
1389	Molybdenum (VI)	Soil	industrial	ng	76.3572
1390	Molybdenum, 0.010% in sulfide, Mo 8.2E-3% and Cu 1.83% in crude ore	Raw	in ground	µg	9.96678
1391	Molybdenum, 0.014% in sulfide, Mo 8.2E-3% and Cu 0.81% in crude ore	Raw	in ground	µg	2.31411
1392	Molybdenum, 0.016% in sulfide, Mo 8.2E-3% and Cu 0.27% in crude ore	Raw	in ground	µg	20.3693
1393	Molybdenum, 0.022% in sulfide, Mo 8.2E-3% and Cu 0.22% in crude ore	Raw	in ground	µg	10.5264
1394	Molybdenum, 0.022% in sulfide, Mo 8.2E-3% and Cu 0.36% in crude ore	Raw	in ground	µg	15.8084
1395	Molybdenum, 0.025% in sulfide, Mo 8.2E-3% and Cu 0.39% in crude ore	Raw	in ground	µg	13.3183
1396	Monobutyltin (III)	Water	ocean	pg	0.0157794
1397	Monocrotophos	Soil	agricultural	µg	-9.50267
1398	Monoethanolamine	Air	high. pop.	µg	364.886
1399	Monoethanolamine	Air	low. pop.	pg	0.0743542
1400	Monoethanolamine	Water		pg	798.088
1401	Monophenyltin	Water	ocean	pg	1.73064e-05
1402	Monosodium acid methanearsonate	Soil	agricultural	pg	-9.88842e-06
1403	Myclobutanil	Soil	agricultural	ng	1.15499
1404	Naphthalene	Air		ng	217.732
1405	Naphthalene	Water	river	ng	66.3963
1406	Napropamide	Soil	agricultural	ng	293.785
1407	Neodymium	Raw	in ground	µg	176.794
1408	Nickel	Raw	in ground	mg	158.71
1409	Nickel (II)	Air		µg	183.524
1410	Nickel (II)	Air	high. pop.	µg	191.19
1411	Nickel (II)	Air	low. pop.	mg	1.36779
1412	Nickel (II)	Air	stratosphere + troposphere	pg	0.744722
1413	Nickel (II)	Water		µg	12.0055
1414	Nickel (II)	Water	groundwater	µg	63.3213
1415	Nickel (II)	Water	ocean	µg	6.97526
1416	Nickel (II)	Water	river	mg	5.03428
1417	Nickel (II)	Soil		µg	5.44874
1418	Nickel (II)	Soil	agricultural	µg	505.298
1419	Nickel (II)	Soil	forestry	µg	1.73347
1420	Nickel (II)	Soil	industrial	µg	4.06515
1421	Nickel, 1.13% in sulfide, Ni 0.76% and Cu 0.76% in crude ore	Raw	in ground	µg	-16.7586
1422	Nickel, 1.98% in silicates, 1.04% in crude ore	Raw	in ground	µg	566.965
1423	Nickel, Ni 2.3E+0%, Pt 2.5E-4%, Pd 7.3E-4%, Rh 2.0E-5%, Cu 3.2E+0% in ore	Raw	in ground	µg	14.6386
1424	Nickel, Ni 2.5E+0%, in mixed ore	Raw	in ground	ng	-659.425
1425	Nickel, Ni 3.7E-2%, Pt 4.8E-4%, Pd 2.0E-4%, Rh 2.4E-5%, Cu 5.2E-2% in ore	Raw	in ground	ng	-698.683
1426	Nicosulfuron	Air	low. pop.	pg	7.97255
1427	Nicosulfuron	Water		pg	0.0123278
1428	Nicosulfuron	Water	groundwater	pg	2.06633
1429	Nicosulfuron	Soil	agricultural	ng	4.61597
1430	Nicosulfuron	Soil	forestry	pg	0.283753
1431	Niobium	Raw	in ground	µg	23.0732
1432	Niobium-95	Air	low. pop.	mBq	45.9062
1433	Niobium-95	Water	river	µBq	537.221
1434	Nitrate	Air		µg	105.255
1435	Nitrate	Air	high. pop.	pg	570.217
1436	Nitrate	Air	low. pop.	µg	14.3777
1437	Nitrate	Water		µg	184.071
1438	Nitrate	Water	groundwater	g	90.9583
1439	Nitrate	Water	ocean	µg	230.127
1440	Nitrate	Water	river	mg	167.455
1441	Nitrate	Soil		µg	206.062
1442	Nitric acid	Air		pg	1.20475
1443	Nitric acid	Air	high. pop.	µg	8.07477
1444	Nitric acid	Soil	industrial	ng	121.685
1445	Nitrite	Water		µg	2.46282
1446	Nitrite	Water	groundwater	µg	7.94659
1447	Nitrite	Water	ocean	µg	4.7503
1448	Nitrite	Water	river	µg	27.4311
1449	Nitrobenzene	Air	high. pop.	µg	69.6965
1450	Nitrobenzene	Water		pg	665.905
1451	Nitrobenzene	Water	river	µg	279.308
1452	Nitrogen dioxide	Water	river	ng	84.4239
1453	Nitrogen fluoride	Air	high. pop.	pg	0.106729
1454	Nitrogen monoxide	Air		ng	664.268
1455	Nitrogen oxides	Air		mg	457.519
1456	Nitrogen oxides	Air	high. pop.	g	1.9239
1457	Nitrogen oxides	Air	low. pop.	g	2.96725
1458	Nitrogen oxides	Air	stratosphere + troposphere	µg	2.01582
1459	Nitrogen, atmospheric	Raw	in air	g	31.2967
1460	Nitrogen, atmospheric	Air		g	4.67575
1461	Nitrogen, atmospheric	Water		µg	205.33
1462	Nitrogen, atmospheric	Water	groundwater	ng	1.47835
1463	Nitrogen, atmospheric	Water	ocean	µg	41.616
1464	Nitrogen, atmospheric	Water	river	mg	65.8259
1465	Nitrogen, atmospheric	Soil		µg	10.5055
1466	Nitrogen, atmospheric	Soil	industrial	µg	95.8855
1467	Nitrogen, organic bound	Water		µg	1.22801
1468	Nitrogen, organic bound	Water	groundwater	µg	238.634
1469	Nitrogen, organic bound	Water	ocean	ng	-301.891
1470	Nitrogen, organic bound	Water	river	µg	105.659
1471	NMVOC, non-methane volatile organic compounds	Air		mg	58.1387
1472	NMVOC, non-methane volatile organic compounds	Air	high. pop.	mg	371.388
1473	NMVOC, non-methane volatile organic compounds	Air	low. pop.	mg	867.725
1474	NMVOC, non-methane volatile organic compounds	Air	stratosphere + troposphere	ng	1.3984
1475	Noble gases, radioactive, unspecified	Air	low. pop.	kBq	18.1547
1476	Norflurazon	Soil	agricultural	pg	143.925
1477	Novaluron	Soil	agricultural	ng	1.48742
1478	o-Xylene	Air		µg	23.6591
1479	o-Xylene	Air	high. pop.	ng	3.70681
1480	o-Xylene	Water		ng	69.6873
1481	Occupation, annual crop	Raw	land	cm2a	-20.9827
1482	Occupation, annual crop, greenhouse	Raw	land	mm2a	0.000177343
1483	Occupation, annual crop, irrigated	Raw	land	mm2a	-143.418
1484	Occupation, annual crop, irrigated, intensive	Raw	land	mm2a	-0.0063566
1485	Occupation, annual crop, non-irrigated	Raw	land	mm2a	0.846879
1486	Occupation, annual crop, non-irrigated, extensive	Raw	land	mm2a	6.86138
1487	Occupation, annual crop, non-irrigated, intensive	Raw	land	cm2a	37.4608
1488	Occupation, construction site	Raw	land	mm2a	469.968
1489	Occupation, dump site	Raw	land	cm2a	17.9224
1490	Occupation, forest, extensive	Raw	land	cm2a	52.6624
1491	Occupation, forest, intensive	Raw	land	cm2a	197.589
1492	Occupation, grassland, natural (non-use)	Raw	land	mm2a	-0.842696
1493	Occupation, grassland, natural, for livestock grazing	Raw	land	mm2a	0.314975
1494	Occupation, industrial area	Raw		mm2a	69.2079
1495	Occupation, industrial area	Raw	land	mm2a	381.917
1496	Occupation, inland waterbody, unspecified	Raw	land	mm2a	0.00609549
1497	Occupation, mineral extraction site	Raw	land	mm2a	369.186
1498	Occupation, pasture, man made	Raw	land	mm2a	0.616657
1499	Occupation, pasture, man made, extensive	Raw	land	mm2a	828.849
1500	Occupation, pasture, man made, intensive	Raw	land	cm2a	10.867
1501	Occupation, permanent crop	Raw	land	m2a	1.56958
1502	Occupation, permanent crop, irrigated	Raw	land	mm2a	34.1173
1503	Occupation, permanent crop, irrigated, intensive	Raw	land	mm2a	0.0186402
1504	Occupation, permanent crop, non-irrigated	Raw	land	mm2a	37.9646
1505	Occupation, permanent crop, non-irrigated, intensive	Raw	land	mm2a	0.000395708
1506	Occupation, sea and ocean	Raw	land	mm2a	2.01675e-05
1507	Occupation, seabed, drilling and mining	Raw	land	mm2a	1.39636
1508	Occupation, seabed, infrastructure	Raw	land	mm2a	0.0842736
1509	Occupation, shrub land, sclerophyllous	Raw	land	mm2a	109.626
1510	Occupation, traffic area, rail network	Raw	land	mm2a	4.93309
1511	Occupation, traffic area, rail/road embankment	Raw	land	mm2a	298.701
1512	Occupation, traffic area, road network	Raw	land	mm2a	81.641
1513	Occupation, unspecified	Raw	land	mm2a	0.364531
1514	Occupation, unspecified, natural (non-use)	Raw	land	mm2a	0.135231
1515	Occupation, urban, continuously built	Raw	land	mm2a	0.000376803
1516	Occupation, urban, discontinuously built	Raw	land	mm2a	6.14159
1517	Occupation, urban, green areas	Raw	land	mm2a	0.00077621
1518	Occupation, urban/industrial fallow (non-use)	Raw	land	mm2a	1.55211
1519	Occupation, water bodies, artificial	Raw	land	cm2a	10.0575
1520	Octaethylene glycol monododecyl ether	Air		pg	96.3941
1521	Oil, crude	Raw	in ground	g	268.604
1522	Oils, biogenic	Water	ocean	ng	2.56835
1523	Oils, biogenic	Water	river	µg	-158.907
1524	Oils, biogenic	Soil		µg	3.2301
1525	Oils, biogenic	Soil	forestry	mg	11.2197
1526	Oils, biogenic	Soil	industrial	ng	10.1141
1527	Oils, unspecified	Water		µg	426.604
1528	Oils, unspecified	Water	groundwater	pg	327.301
1529	Oils, unspecified	Water	ocean	mg	67.9724
1530	Oils, unspecified	Water	river	mg	26.5839
1531	Oils, unspecified	Soil		mg	2.72192
1532	Oils, unspecified	Soil	forestry	mg	3.19699
1533	Oils, unspecified	Soil	industrial	mg	19.266
1534	Olivine	Raw	in ground	µg	314.012
1535	Orbencarb	Soil	agricultural	ng	185.851
1536	Organic carbon	Air	high. pop.	ng	103.296
1537	Organic carbon	Water	groundwater	ng	336.121
1538	Organic carbon	Soil		ng	336.121
1539	Organic carbon, placed in landfill	Waste		mg	448.094
1540	Oryzalin	Soil	agricultural	pg	60.7966
1541	Oxamyl	Soil	agricultural	ng	71.7666
1542	Oxydemeton methyl	Soil	agricultural	pg	555.163
1543	Oxyfluorfen	Soil	agricultural	ng	7.43118
1544	Oxygen	Raw	in air	g	22.7734
1545	Oxygen	Air		ng	842.561
1546	Oxygen	Water		pg	17.4929
1547	Oxygen	Water	river	mg	173.673
1548	Ozone	Air		mg	2.42221
1549	Ozone	Air	high. pop.	ng	16.5497
1550	PAH, polycyclic aromatic hydrocarbons	Air		µg	108.433
1551	PAH, polycyclic aromatic hydrocarbons	Air	high. pop.	µg	204.981
1552	PAH, polycyclic aromatic hydrocarbons	Air	low. pop.	mg	3.55832
1553	PAH, polycyclic aromatic hydrocarbons	Water		ng	37.1117
1554	PAH, polycyclic aromatic hydrocarbons	Water	groundwater	ng	536.441
1555	PAH, polycyclic aromatic hydrocarbons	Water	ocean	µg	43.7315
1556	PAH, polycyclic aromatic hydrocarbons	Water	river	µg	86.1323
1557	PAH, polycyclic aromatic hydrocarbons	Soil		ng	536.441
1558	Palladium	Raw	in ground	µg	4.09066
1559	Palladium (II)	Air		ng	37.3394
1560	Palladium, Pd 1.6E-6%, in mixed ore	Raw	in ground	pg	-44.0653
1561	Palladium, Pd 2.0E-4%, Pt 4.8E-4%, Rh 2.4E-5%, Ni 3.7E-2%, Cu 5.2E-2% in ore	Raw	in ground	ng	-1.36328
1562	Palladium, Pd 7.3E-4%, Pt 2.5E-4%, Rh 2.0E-5%, Ni 2.3E+0%, Cu 3.2E+0% in ore	Raw	in ground	ng	4.61943
1563	Paraffins	Air	high. pop.	pg	943.534
1564	Paraffins	Air	low. pop.	ng	37.1697
1565	Paraffins	Water	river	ng	4.19444
1566	Paraquat	Air	low. pop.	ng	-201.376
1567	Paraquat	Soil	agricultural	ng	135.236
1568	Parathion	Soil	agricultural	ng	1.98484
1569	Parathion, methyl	Air	low. pop.	ng	-38.6463
1570	Parathion, methyl	Soil	agricultural	ng	-1.65654
1571	Particulates	Air		µg	161.837
1572	Particulates, < 2.5 um	Air		mg	44.414
1573	Particulates, < 2.5 um	Air	high. pop.	mg	665.464
1574	Particulates, < 2.5 um	Air	low. pop.	g	1.42484
1575	Particulates, < 2.5 um	Air	stratosphere + troposphere	ng	1.79401
1576	Particulates, > 10 um	Air		mg	70.7978
1577	Particulates, > 10 um	Air	high. pop.	mg	67.9867
1578	Particulates, > 10 um	Air	low. pop.	mg	269.268
1579	Particulates, > 2.5 um, and < 10um	Air		mg	23.9916
1580	Particulates, > 2.5 um, and < 10um	Air	high. pop.	mg	83.635
1581	Particulates, > 2.5 um, and < 10um	Air	low. pop.	g	1.2238
1582	Peat	Raw	biotic	mg	290.055
1583	Pendimethalin	Air	low. pop.	µg	-2.12154
1584	Pendimethalin	Water	groundwater	pg	1.29823
1585	Pendimethalin	Water	river	pg	0.00217641
1586	Pendimethalin	Soil	agricultural	µg	-0.785177
1587	Penflufen	Water	groundwater	pg	2.87262e-10
1588	Penflufen	Soil	agricultural	pg	2.58337e-09
1589	Pentane	Air		mg	10.4049
1590	Pentane	Air	high. pop.	mg	3.21724
1591	Pentane	Air	low. pop.	mg	8.60969
1592	Pentane	Water		pg	5.65838
1593	Pentane, 2-methyl-	Air	high. pop.	ng	31.5885
1594	Pentane, 2-methyl-	Water	river	ng	70.8762
1595	Pentane, 2,2,4-trimethyl-	Air		ng	120.612
1596	Perlite	Raw	in ground	g	3.00005
1597	Permethrin	Air	low. pop.	ng	-31.5259
1598	Permethrin	Water		pg	7.08377
1599	Permethrin	Soil	agricultural	ng	2.0632
1600	Pesticides, unspecified	Water		pg	795.557
1601	Pesticides, unspecified	Water	groundwater	ng	3.20824
1602	Pesticides, unspecified	Soil		pg	0.0164355
1603	Pesticides, unspecified	Soil	agricultural	µg	1.90517
1604	Pesticides, unspecified	Soil	forestry	ng	16.7513
1605	Phenanthrene	Air		ng	25.828
1606	Phenanthrene	Water	river	ng	745.247
1607	Phenmedipham	Soil	agricultural	ng	673.602
1608	Phenol	Air		ng	31.5386
1609	Phenol	Air	high. pop.	µg	66.0146
1610	Phenol	Air	low. pop.	µg	820.962
1611	Phenol	Water		µg	6.30139
1612	Phenol	Water	groundwater	pg	15.2227
1613	Phenol	Water	ocean	µg	161.101
1614	Phenol	Water	river	µg	707.732
1615	Phenol, 2,4-dichloro-	Air		ng	11.8468
1616	Phenol, 2,4-dichloro-	Air	high. pop.	µg	6.55764
1617	Phenol, pentachloro-	Air		ng	2.33163
1618	Phenol, pentachloro-	Air	high. pop.	ng	112.885
1619	Phenol, pentachloro-	Air	low. pop.	µg	3.33168
1620	Phenol, pentachloro-	Soil		pg	66.763
1621	Phorate	Soil	agricultural	ng	86.5629
1622	Phosgene	Air		µg	18.0715
1623	Phosmet	Soil	agricultural	ng	9.5642
1624	Phosphate	Water		ng	56.097
1625	Phosphate	Water	groundwater	mg	37.5788
1626	Phosphate	Water	ocean	mg	2.47629
1627	Phosphate	Water	river	mg	292.011
1628	Phosphine	Air	high. pop.	pg	265.155
1629	Phosphoric acid	Air	high. pop.	pg	0.193064
1630	Phosphoric acid	Air	low. pop.	pg	15.9721
1631	Phosphoric acid	Water		pg	56.9872
1632	Phosphorus	Raw	in ground	g	2.12916
1633	Phosphorus	Air		µg	4.27724
1634	Phosphorus	Air	high. pop.	mg	4.63858
1635	Phosphorus	Air	low. pop.	ng	482.632
1636	Phosphorus	Water		µg	24.137
1637	Phosphorus	Water	groundwater	mg	10.9755
1638	Phosphorus	Water	ocean	ng	83.3535
1639	Phosphorus	Water	river	mg	56.2316
1640	Phosphorus	Soil		µg	26.2627
1641	Phosphorus	Soil	agricultural	mg	29.267
1642	Phosphorus	Soil	industrial	µg	25.4819
1643	Phosphorus oxychloride	Water		pg	102.171
1644	Phosphorus pentachloride	Water		pg	64.0359
1645	Phosphorus trichloride	Air		ng	8.26497
1646	Phosphorus trichloride	Air	high. pop.	ng	4.10397
1647	Phosphorus trichloride	Water		pg	2.78087
1648	Phosphorus, 18% in apatite, 4% in crude ore	Raw	in ground	mg	-2.02303
1649	Picloram	Soil	agricultural	pg	0.0841375
1650	Picoxystrobin	Soil	agricultural	ng	-244.885
1651	Picoxystrobin	Soil	forestry	pg	685.809
1652	Piperonyl butoxide	Soil	agricultural	pg	289.997
1653	Pirimicarb	Soil	agricultural	ng	3.09799
1654	Pirimiphos methyl	Soil	agricultural	pg	123.581
1655	Platinum	Raw	in ground	µg	2.0237
1656	Platinum	Air		ng	135.694
1657	Platinum	Air	high. pop.	ng	2.27019
1658	Platinum	Air	low. pop.	ng	21.4371
1659	Platinum, Pt 2.5E-4%, Pd 7.3E-4%, Rh 2.0E-5%, Ni 2.3E+0%, Cu 3.2E+0% in ore	Raw	in ground	ng	1.58348
1660	Platinum, Pt 4.7E-7%, in mixed ore	Raw	in ground	pg	-12.7462
1661	Platinum, Pt 4.8E-4%, Pd 2.0E-4%, Rh 2.4E-5%, Ni 3.7E-2%, Cu 5.2E-2% in ore	Raw	in ground	ng	-3.20798
1662	Plutonium-238	Air	low. pop.	nBq	0.257127
1663	Plutonium-alpha	Air	low. pop.	nBq	0.58943
1664	Polonium-210	Air		µBq	593.507
1665	Polonium-210	Air	high. pop.	mBq	33.4167
1666	Polonium-210	Air	low. pop.	mBq	79.6893
1667	Polonium-210	Water	groundwater	mBq	1.14378
1668	Polonium-210	Water	ocean	mBq	224.056
1669	Polonium-210	Water	river	mBq	6.85004
1670	Polychlorinated biphenyls	Air		ng	2.49193
1671	Polychlorinated biphenyls	Air	high. pop.	ng	8.44312
1672	Polychlorinated biphenyls	Air	low. pop.	ng	11.8246
1673	Polychlorinated biphenyls	Water		pg	-16.2914
1674	Potassium	Raw	in ground	g	9.35658
1675	Potassium-40	Air		µBq	79.8915
1676	Potassium-40	Air	high. pop.	mBq	5.23771
1677	Potassium-40	Air	low. pop.	mBq	11.6757
1678	Potassium-40	Water	groundwater	µBq	90.8544
1679	Potassium-40	Water	ocean	mBq	17.746
1680	Potassium-40	Water	river	mBq	8.43942
1681	Potassium (I)	Air		mg	1.70683
1682	Potassium (I)	Air	high. pop.	mg	337.43
1683	Potassium (I)	Air	low. pop.	µg	6.1499
1684	Potassium (I)	Water		pg	350.56
1685	Potassium (I)	Water	groundwater	mg	4.45012
1686	Potassium (I)	Water	ocean	mg	337.316
1687	Potassium (I)	Water	river	mg	733.106
1688	Potassium (I)	Soil		µg	284.639
1689	Potassium (I)	Soil	agricultural	mg	163.268
1690	Potassium (I)	Soil	industrial	µg	81.1602
1691	Potassium chloride	Raw	in ground	g	73.4616
1692	Praseodymium	Raw	in ground	µg	57.7229
1693	Primisulfuron	Soil	agricultural	ng	1.94649
1694	Prochloraz	Soil	agricultural	ng	1.28898
1695	Procymidone	Soil	agricultural	ng	40.3643
1696	Profenofos	Soil	agricultural	ng	949.725
1697	Prohexadione-calcium	Soil	agricultural	pg	0.0506971
1698	Prometryn	Soil	agricultural	pg	-8.25894e-06
1699	Pronamide	Soil	agricultural	pg	0.359433
1700	Propachlor	Soil	agricultural	ng	1.50796
1701	Propamocarb HCl	Soil	agricultural	pg	415.63
1702	Propanal	Air		µg	1.97909
1703	Propanal	Air	high. pop.	µg	19.7879
1704	Propanal	Air	low. pop.	µg	25.6711
1705	Propanal	Water	river	ng	-3.22759
1706	Propane	Air		µg	10.2252
1707	Propane	Air	high. pop.	mg	1.01629
1708	Propane	Air	low. pop.	mg	33.1283
1709	Propanil	Soil	agricultural	ng	1.91257
1710	Propargite	Soil	agricultural	ng	27.7647
1711	Propene	Air		ng	238.318
1712	Propene	Air	high. pop.	mg	328.901
1713	Propene	Air	low. pop.	mg	75.0875
1714	Propene	Water	river	mg	791.414
1715	Propiconazole	Air	low. pop.	ng	-27.8056
1716	Propiconazole	Water		pg	35.257
1717	Propiconazole	Water	groundwater	pg	-10.3682
1718	Propiconazole	Water	river	pg	0.482797
1719	Propiconazole	Soil	agricultural	µg	-1.31697
1720	Propiconazole	Soil	forestry	pg	409.297
1721	Propineb	Soil	agricultural	pg	3.86275
1722	Propionic acid	Air		ng	421.538
1723	Propionic acid	Air	high. pop.	µg	56.9171
1724	Propionic acid	Air	low. pop.	µg	20.0618
1725	Propionic acid	Water	river	µg	15.6614
1726	Propoxycarbazone-sodium (prop)	Soil	agricultural	pg	0.281065
1727	Propylamine	Air	high. pop.	ng	-0.405571
1728	Propylamine	Water	river	ng	-0.973419
1729	Propylene oxide	Air	high. pop.	ng	765.679
1730	Propylene oxide	Water	river	µg	1.81059
1731	Prosulfuron	Soil	agricultural	pg	345.907
1732	Protactinium-234	Air	low. pop.	mBq	1.65768
1733	Protactinium-234	Water	river	mBq	21.2061
1734	Prothioconazole	Air	low. pop.	ng	167.398
1735	Prothioconazole	Water		pg	300.859
1736	Prothioconazole	Water	groundwater	pg	54.9448
1737	Prothioconazole	Water	river	pg	4.98312e-09
1738	Prothioconazole	Soil	agricultural	ng	273.369
1739	Prothioconazole	Soil	forestry	ng	9.24229
1740	Pumice	Raw	in ground	µg	135.413
1741	Pymetrozine	Soil	agricultural	ng	2.66008
1742	Pyraclostrobin	Air	low. pop.	ng	62.2085
1743	Pyraclostrobin	Water		pg	183.272
1744	Pyraclostrobin	Water	groundwater	pg	97.1074
1745	Pyraclostrobin	Water	river	pg	0.000388036
1746	Pyraclostrobin	Soil	agricultural	ng	142.806
1747	Pyraclostrobin	Soil	forestry	ng	7.21276
1748	Pyraflufen-ethyl	Air		pg	5.70352e-10
1749	Pyraflufen-ethyl	Soil	agricultural	ng	855.045
1750	Pyrene	Air		pg	147.864
1751	Pyrene	Water	river	ng	676.798
1752	Pyrethrin	Soil	agricultural	pg	6.64777
1753	Pyrimethanil	Soil	agricultural	pg	40.4273
1754	Pyriproxyfen	Air	low. pop.	ng	18.0166
1755	Pyriproxyfen	Water		pg	15.2067
1756	Pyriproxyfen	Water	groundwater	pg	3.01066
1757	Pyriproxyfen	Soil	agricultural	ng	45.6843
1758	Pyriproxyfen	Soil	forestry	ng	1.32878
1759	Pyrithiobac sodium salt	Soil	agricultural	pg	-5.52666e-07
1760	Pyroxasulfone	Water	groundwater	pg	4.36348e-08
1761	Pyroxasulfone	Soil	agricultural	pg	3.93216e-07
1762	Quinclorac	Soil	agricultural	pg	31.9436
1763	Quinmerac	Soil	agricultural	pg	0.0260241
1764	Quinoxyfen	Soil	agricultural	pg	2.4579
1765	Quizalofop-P	Soil	agricultural	ng	5.80645
1766	Quizalofop-P-ethyl	Air	low. pop.	ng	4.50347
1767	Quizalofop-P-ethyl	Water		pg	6.88197
1768	Quizalofop-p-ethyl	Soil	agricultural	ng	40.461
1769	Quizalofop-p-ethyl	Soil	forestry	pg	127.881
1770	Quizalofop ethyl ester	Air	low. pop.	ng	-12.5168
1771	Quizalofop ethyl ester	Water	groundwater	pg	1.29085e-08
1772	Quizalofop ethyl ester	Soil	agricultural	ng	4.63014
1773	Radioactive species, alpha emitters	Water	river	mBq	13.2388
1774	Radioactive species, Nuclides, unspecified	Water	ocean	Bq	1.83039
1775	Radioactive species, Nuclides, unspecified	Water	river	mBq	7.23558
1776	Radioactive species, other beta emitters	Air		nBq	-1.81291e-05
1777	Radioactive species, other beta emitters	Air	high. pop.	mBq	15.037
1778	Radioactive species, other beta emitters	Air	low. pop.	µBq	17.7922
1779	Radium-224	Water	ocean	mBq	505.273
1780	Radium-224	Water	river	mBq	992.895
1781	Radium-226	Air		µBq	83.8313
1782	Radium-226	Air	high. pop.	mBq	4.71805
1783	Radium-226	Air	low. pop.	mBq	62.6099
1784	Radium-226	Water		mBq	4.18296
1785	Radium-226	Water	groundwater	µBq	843.135
1786	Radium-226	Water	ocean	Bq	12.3272
1787	Radium-226	Water	river	Bq	30.8559
1788	Radium-228	Air		µBq	24.8646
1789	Radium-228	Air	high. pop.	mBq	23.3454
1790	Radium-228	Air	low. pop.	mBq	3.11733
1791	Radium-228	Water		mBq	5.8836
1792	Radium-228	Water	ocean	Bq	2.00367
1793	Radium-228	Water	river	Bq	3.93317
1794	Radon-220	Air		mBq	1.74337
1795	Radon-220	Air	high. pop.	mBq	8.24606
1796	Radon-220	Air	low. pop.	mBq	295.888
1797	Radon-222	Air		µBq	979.154
1798	Radon-222	Air	high. pop.	mBq	4.80501
1799	Radon-222	Air	low. pop.	kBq	2.6766
1800	Raw Kiselgur in ground (Diatomaceous Earth)	Raw		g	1.87735
1801	residual wood, dry	Social		mm3	-0.684896
1802	Rhenium	Raw	in ground	ng	238.447
1803	Rhodium	Raw	in ground	ng	480.776
1804	Rhodium (III)	Air		ng	35.9374
1805	Rhodium, Rh 1.6E-7%, in mixed ore	Raw	in ground	pg	-4.32459
1806	Rhodium, Rh 2.0E-5%, Pt 2.5E-4%, Pd 7.3E-4%, Ni 2.3E+0%, Cu 3.2E+0% in ore	Raw	in ground	pg	126.45
1807	Rhodium, Rh 2.4E-5%, Pt 4.8E-4%, Pd 2.0E-4%, Ni 3.7E-2%, Cu 5.2E-2% in ore	Raw	in ground	pg	-160.612
1808	Rimsulfuron	Soil	agricultural	ng	3.22115
1809	Rotenone	Soil	agricultural	pg	3.72275
1810	Rubidium	Water	ocean	µg	20.0432
1811	Rubidium	Water	river	µg	39.7262
1812	Ruthenium-103	Air	low. pop.	nBq	2.77697
1813	Ruthenium-103	Water	river	µBq	48.305
1814	Saflufenacil	Water	groundwater	pg	4.36668e-08
1815	Saflufenacil	Soil	agricultural	pg	3.92713e-07
1816	Samarium	Raw	in ground	µg	13.6645
1817	Sand	Raw	in ground	mg	895.358
1818	Scandium	Raw	in ground	ng	197.593
1819	Scandium	Air		pg	0.575957
1820	Scandium	Air	high. pop.	ng	452.061
1821	Scandium	Air	low. pop.	ng	17.4695
1822	Scandium	Water	groundwater	µg	3.89768
1823	Scandium	Water	river	µg	21.9949
1824	Scandium	Soil		ng	553.163
1825	Scandium	Soil	agricultural	ng	621.774
1826	Sedaxane	Water	groundwater	pg	1.0083e-08
1827	Sedaxane	Soil	agricultural	pg	9.07211e-08
1828	Selenium	Raw	in ground	µg	180.71
1829	Selenium	Air		ng	130.528
1830	Selenium	Air	high. pop.	µg	1.0227
1831	Selenium	Air	low. pop.	µg	1.81127
1832	Selenium	Air	stratosphere + troposphere	pg	0.106418
1833	Selenium	Water		ng	14.8763
1834	Selenium	Water	groundwater	ng	407.45
1835	Selenium	Water	ocean	pg	-299.775
1836	Selenium	Water	river	µg	1.51349
1837	Selenium	Soil		ng	107.951
1838	Selenium	Soil	industrial	ng	15.2964
1839	Selenium (IV)	Air		µg	5.41421
1840	Selenium (IV)	Air	high. pop.	µg	4.82925
1841	Selenium (IV)	Air	low. pop.	µg	25.3222
1842	Selenium (IV)	Air	stratosphere + troposphere	pg	0.000269934
1843	Selenium (IV)	Water		µg	1.43257
1844	Selenium (IV)	Water	groundwater	µg	11.0952
1845	Selenium (IV)	Water	river	µg	24.5448
1846	Selenium (IV)	Soil		µg	3.09834
1847	Selenium (IV)	Soil	agricultural	ng	407.353
1848	Selenium (IV)	Soil	industrial	ng	99.5799
1849	Sethoxydim	Air	low. pop.	ng	-25.189
1850	Sethoxydim	Water	groundwater	pg	9.30041e-08
1851	Sethoxydim	Soil	agricultural	ng	26.2092
1852	Shale	Raw	in ground	g	20.1268
1853	Silicon	Raw	in ground	mg	23.4622
1854	Silicon	Air		mg	1.76353
1855	Silicon	Air	high. pop.	mg	33.6894
1856	Silicon	Air	low. pop.	µg	20.7987
1857	Silicon	Water		pg	17.4037
1858	Silicon	Water	groundwater	mg	4.07961
1859	Silicon	Water	ocean	ng	51.4162
1860	Silicon	Water	river	mg	35.4396
1861	Silicon	Soil		mg	5.42812
1862	Silicon	Soil	agricultural	mg	247.128
1863	Silicon	Soil	industrial	mg	1.32523
1864	Silicon dioxide	Water	river	ng	11.2079
1865	Silicon tetrachloride	Air	high. pop.	ng	1.32052
1866	Silicon tetrafluoride	Air	low. pop.	µg	2.35239
1867	Silthiofam	Soil	agricultural	pg	3.77729
1868	Silver	Raw	in ground	µg	896.834
1869	Silver-110	Air	low. pop.	nBq	528.398
1870	Silver-110	Water	river	mBq	11.5186
1871	Silver (I)	Air		ng	539.864
1872	Silver (I)	Air	high. pop.	ng	890.61
1873	Silver (I)	Air	low. pop.	ng	222.868
1874	Silver (I)	Water		µg	6.62027
1875	Silver (I)	Water	groundwater	ng	322.506
1876	Silver (I)	Water	ocean	µg	1.20259
1877	Silver (I)	Water	river	µg	6.07512
1878	Silver (I)	Soil		ng	93.4969
1879	Silver (I)	Soil	agricultural	µg	1.36517
1880	Silver (I)	Soil	industrial	ng	20.9244
1881	Silver, 0.007% in sulfide, Ag 0.004%, Pb, Zn, Cd, In	Raw	in ground	ng	-111.262
1882	Silver, Ag 1.5E-4%, Au 6.8E-4%, in ore	Raw	in ground	pg	29.0905
1883	Silver, Ag 1.5E-5%, Au 5.4E-4%, in ore	Raw	in ground	pg	2.66286
1884	Silver, Ag 1.8E-6%, in mixed ore	Raw	in ground	pg	-49.1637
1885	Silver, Ag 2.1E-4%, Au 2.1E-4%, in ore	Raw	in ground	ng	1.27773
1886	Silver, Ag 4.2E-3%, Au 1.1E-4%, in ore	Raw	in ground	ng	-647.651
1887	Silver, Ag 4.6E-5%, Au 1.3E-4%, in ore	Raw	in ground	ng	2.07101
1888	Silver, Ag 7.6E-5%, Au 9.7E-5%, in ore	Raw	in ground	pg	367.368
1889	Silver, Ag 9.7E-4%, Au 9.7E-4%, Zn 0.63%, Cu 0.38%, Pb 0.014%, in ore	Raw	in ground	µg	1.02473
1890	Simazine	Air	low. pop.	pg	35.5737
1891	Simazine	Water		pg	0.0677102
1892	Simazine	Water	groundwater	pg	0.766466
1893	Simazine	Soil	agricultural	ng	41.7423
1894	Simazine	Soil	forestry	pg	1.03628
1895	Sodium	Raw	in ground	µg	225.762
1896	Sodium	Air		µg	267.637
1897	Sodium	Air	high. pop.	mg	19.0983
1898	Sodium	Air	low. pop.	µg	11.0557
1899	Sodium	Water		mg	49.8562
1900	Sodium	Water	groundwater	mg	12.4955
1901	Sodium	Water	ocean	g	9.65204
1902	Sodium	Water	river	g	36.8972
1903	Sodium	Soil		µg	186.667
1904	Sodium	Soil	agricultural	µg	401.297
1905	Sodium	Soil	industrial	µg	342.881
1906	Sodium-24	Water	river	mBq	1.69379
1907	Sodium chlorate	Air	high. pop.	µg	6.05895
1908	Sodium chlorate	Water	groundwater	pg	-2.27112e-06
1909	Sodium chloride	Raw	in ground	g	28.1305
1910	Sodium dichromate	Air	high. pop.	ng	223.327
1911	Sodium formate	Air	high. pop.	ng	5.86129
1912	Sodium formate	Water	river	ng	14.0814
1913	Sodium hydroxide	Air		pg	-0.183625
1914	Sodium hydroxide	Air	high. pop.	ng	20.1769
1915	Sodium nitrate	Raw	in ground	µg	-0.668531
1916	Sodium sulfate	Raw	in ground	mg	10.3377
1917	Sodium tetrahydroborate	Air	high. pop.	pg	70.858
1918	Solids, inorganic	Water		µg	3.03328
1919	Solids, inorganic	Water	groundwater	mg	84.9641
1920	Solids, inorganic	Water	ocean	ng	234.714
1921	Solids, inorganic	Water	river	mg	160.493
1922	Spinosad	Soil	agricultural	pg	62.5373
1923	Spiroxamine	Soil	agricultural	ng	48.117
1924	Spodumene	Raw	in ground	µg	91.6571
1925	Steatite	Raw	in ground	pg	148.054
1926	Stibnite	Raw	in ground	pg	-2.62995
1927	Strontium	Raw	in ground	µg	646.532
1928	Strontium-89	Water	river	µBq	799.945
1929	Strontium-90	Water	ocean	mBq	39.0048
1930	Strontium-90	Water	river	mBq	675.459
1931	Strontium (II)	Air		µg	13.3499
1932	Strontium (II)	Air	high. pop.	µg	69.6738
1933	Strontium (II)	Air	low. pop.	µg	32.4703
1934	Strontium (II)	Water		µg	172.227
1935	Strontium (II)	Water	groundwater	µg	472.991
1936	Strontium (II)	Water	ocean	mg	23.7185
1937	Strontium (II)	Water	river	mg	27.9159
1938	Strontium (II)	Soil		µg	22.1774
1939	Strontium (II)	Soil	agricultural	µg	40.673
1940	Strontium (II)	Soil	industrial	µg	6.3901
1941	Styrene	Air		µg	33.2202
1942	Styrene	Air	high. pop.	µg	40.0336
1943	Styrene	Air	low. pop.	µg	55.8904
1944	Sulfadiazine	Water		pg	144.497
1945	Sulfate	Air		mg	1.42321
1946	Sulfate	Air	high. pop.	mg	402.19
1947	Sulfate	Air	low. pop.	µg	56.2624
1948	Sulfate	Water		mg	29.6189
1949	Sulfate	Water	groundwater	mg	454.543
1950	Sulfate	Water	ocean	g	2.21391
1951	Sulfate	Water	river	g	58.4397
1952	Sulfate	Soil		µg	344.042
1953	Sulfentrazone	Air	low. pop.	ng	-163.203
1954	Sulfentrazone	Water		pg	47.1509
1955	Sulfentrazone	Water	groundwater	ng	1.8977
1956	Sulfentrazone	Soil	agricultural	µg	1.72305
1957	Sulfentrazone	Soil	forestry	ng	2.84815
1958	Sulfide	Water		µg	18.0681
1959	Sulfide	Water	groundwater	pg	36.8629
1960	Sulfide	Water	ocean	ng	393.5
1961	Sulfide	Water	river	mg	16.7332
1962	Sulfite	Water		ng	1.10118
1963	Sulfite	Water	river	µg	122.294
1964	Sulfosate	Soil	agricultural	µg	-0.858392
1965	Sulfosulfuron	Soil	agricultural	pg	1.62201
1966	Sulfur	Raw	in ground	mg	90.7608
1967	Sulfur	Water		µg	53.8977
1968	Sulfur	Water	groundwater	µg	301.429
1969	Sulfur	Water	ocean	µg	11.1751
1970	Sulfur	Water	river	mg	650.931
1971	Sulfur	Soil		mg	1.17769
1972	Sulfur	Soil	agricultural	mg	28.0599
1973	Sulfur	Soil	industrial	mg	39.6538
1974	Sulfur dioxide	Air		mg	339.8
1975	Sulfur dioxide	Air	high. pop.	g	1.01901
1976	Sulfur dioxide	Air	low. pop.	g	1.76372
1977	Sulfur dioxide	Air	stratosphere + troposphere	ng	8.81406
1978	Sulfur hexafluoride	Air		µg	63.3632
1979	Sulfur hexafluoride	Air	high. pop.	pg	0.42685
1980	Sulfur hexafluoride	Air	low. pop.	pg	-35.5905
1981	Sulfur oxides	Air		µg	341.745
1982	Sulfur trioxide	Air		µg	26.4035
1983	Sulfur trioxide	Air	high. pop.	mg	10.9793
1984	Sulfuric acid	Air		µg	78.8182
1985	Sulfuric acid	Air	high. pop.	ng	6.13601
1986	Sulfuric acid	Air	low. pop.	ng	374.964
1987	Sulfuric acid	Water	river	mg	175.627
1988	Sulfuric acid	Soil	agricultural	µg	13.4957
1989	Suspended solids, unspecified	Water		g	-1.21777
1990	Suspended solids, unspecified	Water	groundwater	mg	6.74916
1991	Suspended solids, unspecified	Water	ocean	mg	5.26287
1992	Suspended solids, unspecified	Water	river	mg	50.8949
1993	t-Butyl methyl ether	Air	high. pop.	µg	8.83373
1994	t-Butyl methyl ether	Water		ng	722.318
1995	t-Butyl methyl ether	Water	ocean	pg	-682.317
1996	t-Butyl methyl ether	Water	river	ng	4.27593
1997	t-Butylamine	Air	high. pop.	ng	-6.41909
1998	t-Butylamine	Water	river	ng	-15.4059
1999	Talc	Raw	in ground	µg	170.722
[truncated: 1,407 more rows]
