# Supplementary material for: Does enzymatic catalysis lead to more sustainable chemicals production? A life cycle sustainability assessment of isopropyl palmitate
Source: Royal Society of Chemistry journal article supplement (doi:10.1039/d4gc04514a), 2024-01-01
Supplement: d4gc04514a3.pdf [file d4gc04514a3.pdf]

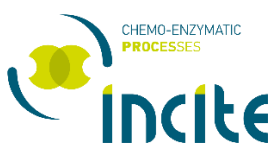

## ***Innovative Chemoenzymatic Integrated Processes***

### **1. General information:**

|                                                      |                   |                          |                   |                          |                   |                          |
|------------------------------------------------------|-------------------|--------------------------|-------------------|--------------------------|-------------------|--------------------------|
| Gender                                               | Woman             | <input type="checkbox"/> | Man               | <input type="checkbox"/> | Other             | <input type="checkbox"/> |
| Age                                                  | Between 15 and 30 | <input type="checkbox"/> | Between 30 and 60 | <input type="checkbox"/> | More than 60      | <input type="checkbox"/> |
| Originally from the area (Parents lived in the area) | Yes               | <input type="checkbox"/> | No                | <input type="checkbox"/> | Prefer not to say | <input type="checkbox"/> |

### **2. Questions about the INCITE project**

2.1. Before my visit, were you aware of the existence of the Incite project?

|                             |                                           |
|-----------------------------|-------------------------------------------|
| <input type="checkbox"/> No | <input type="checkbox"/> Yes, ...<br>How? |
|-----------------------------|-------------------------------------------|

2.2. I have explained the project to you and mentioned several advantages. Which of the following 3 benefits would you find most desirable?

|                                |                          |                 |                          |               |                          |
|--------------------------------|--------------------------|-----------------|--------------------------|---------------|--------------------------|
| Lower CO <sub>2</sub> emission | <input type="checkbox"/> | Waste reduction | <input type="checkbox"/> | Safer process | <input type="checkbox"/> |
|--------------------------------|--------------------------|-----------------|--------------------------|---------------|--------------------------|

2.3. Do you think that this new technology could somehow change the situation related to the environment?

|                             |                                   |
|-----------------------------|-----------------------------------|
| <input type="checkbox"/> No | <input type="checkbox"/> yes, ... |
|-----------------------------|-----------------------------------|

2.4. Do you think that the benefits of this innovative installation can also provide some added value for you as a neighbour of the factory?

|                             |                                   |
|-----------------------------|-----------------------------------|
| <input type="checkbox"/> No | <input type="checkbox"/> yes, ... |
|-----------------------------|-----------------------------------|

2.5. *Would you support the expansion of these kinds of green industry plants?*

No

yes, ...

2.6. *Would you support it even if the products being manufactured would be slightly more expensive?*

No

yes, ...

2.7. *What is your general opinion on this new emerging green industry, as in this project?*

No  
opinion

2.8. *Do you think Belgium and Europe are doing well in greening the industry?*

No

No, it can  
be better

No, ...

Yes, but it can  
beter

Yes, but it can  
go faster

yes, ...

**3. Questions about OLEON:**

3.1 Do you know the company Oleon?

No

yes...

3.2 What comes spontaneously to your mind when you think of Oleon?

3.3 Do you have any problem or concern related with Oleon's activities?

No

yes, ...

3.4 What do you think about Oleon trying out this new innovative technology for the production of sustainable oleochemicals?

No  
opinion

3.5 In your perspective, what are the pros and cons of having a company like Oleon nearby?

Pros.:

Do you know if there are people from the village who work in Oleon? How many?

Do you know of activities in Oelegem or Ranst that are supported by Oleon? (such as a football team, clubs, and the like...)

Cons.:

#### 4. Questions about communication

4.1. Are you familiar with the activities of the Oleon company?

Not at all

A little

A lot

4.2 Would you like to receive more information or be more involved?

No, I have enough information

No, it is not necessary

No, I am not interested

No ...

yes,...

#### 5. Other questions

5.1 Is there anything else that you consider important regarding the potential impact of the INCITE project on Oelegem, matters that I have not asked, but that you would like to mention or get addressed?
